# Supplementary material for: Cell-type-specific response to silicon treatment in soybean leaves revealed by single nucleus RNA-sequencing and targeted gene-editing
Source: Research Square preprint supplement (doi:10.21203/rs.3.rs-4618673/v1), 2024-07-19
Supplement: Supplementary file 1 [file 7da16dccc4ec154e8e6e3652.xlsx]

## Sheet: Supplemental Table S1A
Supplemental Table S1A_Cell type specific marker genes identified by SnRNA-seq in this study. List of genes discovered by FindAllMarkers fucntion in seurat package. The pct.1 (Si+) and pct.2 (Si-) are showing percentage of nuclei expressed corresponding genes in "cell type" and other cells.
p_val	avg_log2FC	pct.1	pct.2	p_val_adj	cluster	gene
1.233e-161	1.33629	0.595	0.063	3.37399e-157	1	Glyma.16G091100
1.82165e-132	1.21142	0.559	0.076	4.98475e-128	1	Glyma.02G001500
1.31817e-130	1.34069	0.585	0.098	3.60703e-126	1	Glyma.15G101800
5.8683e-123	1.0986	0.466	0.045	1.6058e-118	1	Glyma.05G163400
4.85195e-120	1.09807	0.585	0.107	1.32769e-115	1	Glyma.08G199500
3.15116e-113	1.01163	0.458	0.051	8.62283e-109	1	Glyma.15G184400
1.39883e-108	1.09851	0.595	0.133	3.82777e-104	1	Glyma.17G069100
6.44293e-104	0.964482	0.428	0.048	1.76304e-99	1	Glyma.11G200300
2.42122e-96	0.925529	0.413	0.051	6.62543e-92	1	Glyma.06G118550
1.47034e-95	0.946339	0.424	0.056	4.02345e-91	1	Glyma.10G010800
1.65422e-95	1.01751	0.472	0.081	4.5266e-91	1	Glyma.09G218100
2.13394e-93	0.871956	0.403	0.048	5.83931e-89	1	Glyma.20G187400
1.2951e-90	0.934095	0.426	0.063	3.54391e-86	1	Glyma.10G179400
1.18151e-86	0.898713	0.466	0.085	3.2331e-82	1	Glyma.08G269600
2.88458e-84	0.932151	0.661	0.228	7.89335e-80	1	Glyma.01G132500
3.5613e-84	0.766774	0.318	0.025	9.74513e-80	1	Glyma.17G023100
3.48895e-83	0.859299	0.333	0.033	9.54717e-79	1	Glyma.09G135700
2.57232e-82	0.844445	0.379	0.05	7.03889e-78	1	Glyma.17G259500
3.38166e-82	0.852387	0.413	0.065	9.25357e-78	1	Glyma.05G050100
1.65848e-81	0.982819	0.398	0.064	4.53826e-77	1	Glyma.08G070800
2.82131e-80	0.907292	0.627	0.212	7.72024e-76	1	Glyma.15G238600
9.78028e-80	0.804907	0.396	0.062	2.67628e-75	1	Glyma.07G270800
1.60189e-78	0.794617	0.309	0.029	4.38342e-74	1	Glyma.12G183400
1.7077e-78	0.76564	0.328	0.035	4.67294e-74	1	Glyma.09G054000
2.48138e-75	0.737507	0.328	0.037	6.79006e-71	1	Glyma.04G057800
1.71553e-71	0.690876	0.286	0.026	4.69437e-67	1	Glyma.15G005000
4.92983e-70	0.681989	0.297	0.032	1.349e-65	1	Glyma.17G120100
1.79771e-67	0.669739	0.282	0.029	4.91927e-63	1	Glyma.05G203300
2.78089e-66	0.636183	0.258	0.022	7.60963e-62	1	Glyma.18G110500
2.02059e-65	0.887431	0.379	0.078	5.52916e-61	1	Glyma.01G152900
3.89878e-64	0.642577	0.314	0.043	1.06686e-59	1	Glyma.07G069700
7.43882e-62	0.688144	0.303	0.044	2.03556e-57	1	Glyma.18G005800
9.06796e-62	0.79268	0.417	0.098	2.48136e-57	1	Glyma.09G084300
1.2043e-59	0.732265	0.737	0.43	3.29544e-55	1	Glyma.04G180400
5.2378e-59	0.678656	0.309	0.049	1.43327e-54	1	Glyma.16G137600
1.39589e-58	0.518273	0.216	0.015	3.81971e-54	1	Glyma.12G143000
8.9316e-57	0.573869	0.227	0.02	2.44404e-52	1	Glyma.10G203000
1.31171e-56	0.69772	0.244	0.027	3.58937e-52	1	Glyma.05G203000
2.95081e-56	0.550148	0.201	0.012	8.07459e-52	1	Glyma.15G065600
6.39578e-56	0.65476	0.258	0.032	1.75014e-51	1	Glyma.18G273000
2.45195e-55	0.558969	0.242	0.026	6.70951e-51	1	Glyma.04G185800
3.69952e-54	0.546031	0.261	0.033	1.01234e-49	1	Glyma.14G208900
1.45993e-53	0.543484	0.244	0.028	3.99496e-49	1	Glyma.01G016500
1.56801e-53	0.534998	0.218	0.02	4.2907e-49	1	Glyma.07G021000
2.71469e-52	0.529284	0.22	0.022	7.42847e-48	1	Glyma.03G147150
2.51913e-50	0.563672	0.244	0.032	6.89334e-46	1	Glyma.13G231300
1.97978e-49	0.639264	0.297	0.057	5.41747e-45	1	Glyma.19G250233
2.13743e-49	0.518291	0.22	0.025	5.84887e-45	1	Glyma.10G244600
4.74356e-48	0.560399	0.242	0.035	1.29803e-43	1	Glyma.06G211300
5.08776e-48	0.785647	0.369	0.101	1.39221e-43	1	Glyma.01G153300
4.57877e-47	0.595586	0.235	0.033	1.25293e-42	1	Glyma.15G089300
8.66317e-47	0.546063	0.227	0.03	2.37059e-42	1	Glyma.01G129100
9.25445e-47	0.559329	0.278	0.05	2.53239e-42	1	Glyma.07G014100
1.61609e-46	0.468042	0.201	0.021	4.42228e-42	1	Glyma.10G254300
2.00586e-46	0.670977	0.314	0.073	5.48884e-42	1	Glyma.04G017300
1.58511e-45	0.601764	0.318	0.072	4.33749e-41	1	Glyma.17G208200
5.07066e-45	0.559209	0.261	0.046	1.38754e-40	1	Glyma.14G050900
1.24847e-43	0.651546	0.614	0.313	3.41631e-39	1	Glyma.05G079700
2.21662e-43	0.594134	0.288	0.062	6.06557e-39	1	Glyma.13G352900
5.69375e-43	0.449961	0.201	0.025	1.55804e-38	1	Glyma.09G160000
1.46104e-42	0.640209	0.208	0.029	3.99798e-38	1	Glyma.12G009200
2.4273e-42	0.663346	0.441	0.158	6.64208e-38	1	Glyma.13G330400
3.75376e-42	0.561579	0.261	0.051	1.02718e-37	1	Glyma.13G327000
1.69788e-41	0.634942	0.396	0.135	4.64607e-37	1	Glyma.03G141200
5.75864e-41	0.479206	0.218	0.034	1.57579e-36	1	Glyma.05G011900
1.29884e-40	0.560359	0.28	0.063	3.55415e-36	1	Glyma.15G118400
2.95045e-40	0.579922	0.369	0.108	8.07361e-36	1	Glyma.16G210800
4.63426e-40	0.563564	0.288	0.069	1.26812e-35	1	Glyma.09G265200
6.73366e-40	0.509417	0.237	0.044	1.8426e-35	1	Glyma.02G163200
6.59754e-39	0.618766	0.392	0.132	1.80535e-34	1	Glyma.10G212300
2.38041e-37	0.460243	0.222	0.04	6.51375e-33	1	Glyma.06G258900
3.70972e-37	0.443193	0.201	0.031	1.01513e-32	1	Glyma.07G146800
1.14812e-36	0.524753	0.265	0.061	3.14171e-32	1	Glyma.10G274400
1.47582e-34	0.592157	0.318	0.098	4.03843e-30	1	Glyma.03G063600
1.29309e-33	0.499964	0.244	0.056	3.5384e-29	1	Glyma.19G068300
3.65157e-33	0.471364	0.222	0.047	9.99216e-29	1	Glyma.06G307100
9.19757e-33	0.537124	0.261	0.068	2.51682e-28	1	Glyma.11G213000
5.55972e-31	0.562725	0.299	0.095	1.52136e-26	1	Glyma.07G222000
2.77682e-30	0.555765	0.424	0.177	7.59848e-26	1	Glyma.16G178000
2.60549e-29	0.39559	0.203	0.044	7.12966e-25	1	Glyma.12G075100
4.56508e-29	0.430404	0.201	0.044	1.24919e-24	1	Glyma.09G027800
2.35687e-28	0.5438	0.352	0.133	6.44934e-24	1	Glyma.12G204400
1.32227e-27	0.498859	0.239	0.068	3.61827e-23	1	Glyma.03G252700
1.76869e-27	-0.625952	0.229	0.485	4.83985e-23	1	Glyma.18G226850
3.18642e-27	0.536599	0.411	0.18	8.71931e-23	1	Glyma.18G043600
4.87625e-27	0.606048	0.347	0.14	1.33434e-22	1	Glyma.16G135200
2.66134e-26	0.477244	0.301	0.108	7.28249e-22	1	Glyma.04G076000
3.13372e-26	0.41641	0.206	0.052	8.57511e-22	1	Glyma.20G054000
7.21793e-26	0.392009	0.21	0.053	1.97511e-21	1	Glyma.10G180100
1.74222e-25	0.46536	0.282	0.095	4.76742e-21	1	Glyma.02G101300
1.61895e-24	0.374654	0.203	0.053	4.4301e-20	1	Glyma.04G021000
7.06899e-24	0.44724	0.258	0.086	1.93436e-19	1	Glyma.09G027700
4.43197e-22	0.483012	0.572	0.348	1.21276e-17	1	Glyma.10G169600
1.66729e-21	-0.486636	0.335	0.544	4.56237e-17	1	Glyma.06G223500
2.57605e-21	0.455801	0.305	0.128	7.04911e-17	1	Glyma.16G107300
5.71972e-21	0.401125	0.246	0.088	1.56514e-16	1	Glyma.02G061400
8.81432e-21	0.447427	0.525	0.327	2.41195e-16	1	Glyma.17G104800
1.38278e-20	-0.510794	0.248	0.471	3.78384e-16	1	Glyma.04G156200
5.35147e-20	-0.559443	0.169	0.382	1.46438e-15	1	Glyma.05G068000
1.2368e-19	0.437378	0.311	0.133	3.38439e-15	1	Glyma.09G027900
1.38392e-19	0.436458	0.328	0.15	3.78696e-15	1	Glyma.20G066100
2.40793e-19	0.366315	0.214	0.073	6.58905e-15	1	Glyma.06G101800
1.23277e-18	-0.431798	0.335	0.538	3.37334e-14	1	Glyma.03G114600
1.47336e-18	-0.441764	0.335	0.53	4.0317e-14	1	Glyma.11G181100
2.20156e-18	0.426117	0.517	0.323	6.02434e-14	1	Glyma.14G142300
4.89141e-18	0.389403	0.21	0.074	1.33849e-13	1	Glyma.14G195200
6.51993e-18	-0.416737	0.396	0.566	1.78411e-13	1	Glyma.09G154700
8.79951e-18	0.364916	0.248	0.095	2.4079e-13	1	Glyma.13G091000
1.1751e-17	0.37498	0.261	0.106	3.21555e-13	1	Glyma.13G325900
4.74755e-17	0.415213	0.258	0.113	1.29912e-12	1	Glyma.05G216400
7.67971e-17	-0.458415	0.239	0.437	2.10148e-12	1	Glyma.07G091400
1.12796e-16	0.371383	0.271	0.117	3.08654e-12	1	Glyma.10G096800
1.7145e-16	0.378894	0.248	0.103	4.69156e-12	1	Glyma.19G079600
2.53818e-16	-0.339658	0.466	0.609	6.94548e-12	1	Glyma.07G112000
2.77594e-16	-0.407326	0.326	0.514	7.59609e-12	1	Glyma.14G003400
3.27543e-16	-0.413358	0.364	0.534	8.96288e-12	1	Glyma.08G173700
5.70596e-16	0.395127	0.208	0.08	1.56138e-11	1	Glyma.02G024200
8.87636e-16	0.403074	0.352	0.186	2.42893e-11	1	Glyma.02G001700
1.01154e-15	-0.451497	0.157	0.341	2.76798e-11	1	Glyma.07G019700
1.86315e-15	-0.342672	0.475	0.614	5.09832e-11	1	Glyma.05G022900
2.17239e-15	0.354916	0.227	0.092	5.94452e-11	1	Glyma.12G079500
3.1426e-15	-0.358374	0.445	0.616	8.59942e-11	1	Glyma.19G007700
4.68201e-15	0.36427	0.405	0.224	1.28118e-10	1	Glyma.13G027300
7.5617e-15	-0.390605	0.369	0.531	2.06918e-10	1	Glyma.03G136000
1.20617e-14	-0.340274	0.458	0.598	3.30057e-10	1	Glyma.18G036400
1.72517e-14	-0.409577	0.091	0.256	4.72075e-10	1	Glyma.18G226500
1.82224e-14	0.31458	0.21	0.084	4.98638e-10	1	Glyma.15G043600
2.08109e-14	-0.413033	0.193	0.376	5.69471e-10	1	Glyma.15G102000
3.20153e-14	0.33645	0.21	0.087	8.76068e-10	1	Glyma.12G010800
6.01931e-14	-0.390565	0.32	0.473	1.64712e-09	1	Glyma.02G309500
6.02037e-14	-0.378711	0.326	0.504	1.64741e-09	1	Glyma.02G047600
6.46832e-14	-0.410026	0.144	0.315	1.76999e-09	1	Glyma.16G089000
8.02926e-14	0.314582	0.216	0.091	2.19713e-09	1	Glyma.18G105900
8.47818e-14	0.345714	0.278	0.131	2.31997e-09	1	Glyma.08G309900
8.82069e-14	0.332587	0.229	0.101	2.41369e-09	1	Glyma.06G080100
1.00499e-13	0.315518	0.222	0.095	2.75005e-09	1	Glyma.16G087100
1.13739e-13	-0.43699	0.248	0.424	3.11235e-09	1	Glyma.14G109700
1.34274e-13	-0.390061	0.11	0.276	3.67428e-09	1	Glyma.01G214300
1.69224e-13	0.355048	0.292	0.149	4.63065e-09	1	Glyma.09G131100
1.76026e-13	0.405475	0.314	0.173	4.81678e-09	1	Glyma.14G026300
2.26176e-13	0.359949	0.341	0.189	6.18909e-09	1	Glyma.09G260600
2.67418e-13	0.293077	0.218	0.094	7.31763e-09	1	Glyma.17G096100
3.5461e-13	-0.391469	0.144	0.31	9.70354e-09	1	Glyma.17G228800
4.95251e-13	0.455877	0.398	0.255	1.3552e-08	1	Glyma.06G137000
5.27825e-13	-0.384117	0.165	0.34	1.44434e-08	1	Glyma.02G019600
6.97816e-13	-0.389738	0.144	0.307	1.9095e-08	1	Glyma.15G250800
7.68337e-13	-0.299658	0.542	0.646	2.10248e-08	1	Glyma.15G057600
9.57946e-13	0.301375	0.212	0.093	2.62132e-08	1	Glyma.10G065900
9.88527e-13	-0.335605	0.439	0.625	2.705e-08	1	Glyma.05G007100
1.22399e-12	-0.381993	0.265	0.433	3.34932e-08	1	Glyma.04G167900
1.28707e-12	0.31379	0.229	0.105	3.52194e-08	1	Glyma.08G259200
1.56749e-12	0.368735	0.472	0.331	4.28929e-08	1	Glyma.08G328800
1.7387e-12	-0.408649	0.068	0.203	4.75778e-08	1	Glyma.16G031600
1.87346e-12	-0.359733	0.112	0.269	5.12653e-08	1	Glyma.04G161600
2.35425e-12	-0.388708	0.178	0.343	6.44216e-08	1	Glyma.20G144700
2.73442e-12	0.331589	0.278	0.143	7.48247e-08	1	Glyma.11G242200
2.90149e-12	-0.386569	0.133	0.287	7.93965e-08	1	Glyma.13G357300
3.0026e-12	-0.399607	0.193	0.348	8.21632e-08	1	Glyma.10G271600
3.3602e-12	0.334371	0.275	0.143	9.19486e-08	1	Glyma.15G219300
4.05076e-12	-0.368536	0.15	0.31	1.10845e-07	1	Glyma.17G012000
4.29849e-12	-0.372134	0.14	0.295	1.17624e-07	1	Glyma.08G304200
5.32247e-12	-0.351962	0.333	0.49	1.45644e-07	1	Glyma.16G044900
5.3721e-12	-0.378091	0.271	0.423	1.47002e-07	1	Glyma.06G020400
5.8152e-12	0.292501	0.229	0.108	1.59127e-07	1	Glyma.13G131200
6.06874e-12	-0.389597	0.153	0.311	1.66065e-07	1	Glyma.03G014300
6.97554e-12	0.330315	0.235	0.115	1.90879e-07	1	Glyma.04G228300
7.00062e-12	-0.427822	0.093	0.23	1.91565e-07	1	Glyma.15G160300
7.06915e-12	-0.362725	0.265	0.427	1.9344e-07	1	Glyma.13G210800
7.15711e-12	0.346141	0.381	0.238	1.95847e-07	1	Glyma.12G155900
7.46438e-12	-0.356401	0.165	0.328	2.04255e-07	1	Glyma.08G302600
9.82989e-12	-0.358256	0.191	0.35	2.68985e-07	1	Glyma.02G061100
1.39915e-11	-0.346019	0.311	0.483	3.82862e-07	1	Glyma.19G130800
1.54264e-11	0.294673	0.237	0.116	4.22127e-07	1	Glyma.12G002800
1.65622e-11	-0.377483	0.195	0.355	4.53207e-07	1	Glyma.18G057900
1.8576e-11	-0.381733	0.28	0.42	5.08315e-07	1	Glyma.15G194300
2.17124e-11	0.279264	0.208	0.095	5.94138e-07	1	Glyma.09G285100
2.26256e-11	0.321835	0.271	0.146	6.19126e-07	1	Glyma.15G190500
2.37405e-11	0.283066	0.254	0.127	6.49635e-07	1	Glyma.09G234200
2.79128e-11	-0.347025	0.155	0.311	7.63807e-07	1	Glyma.08G214000
3.11606e-11	-0.348979	0.108	0.251	8.5268e-07	1	Glyma.03G261500
3.2001e-11	0.28814	0.212	0.1	8.75676e-07	1	Glyma.12G042800
4.43392e-11	-0.292477	0.443	0.562	1.2133e-06	1	Glyma.19G106800
4.98943e-11	-0.363358	0.146	0.294	1.36531e-06	1	Glyma.17G150100
5.1957e-11	-0.414461	0.087	0.215	1.42175e-06	1	Glyma.15G021400
5.42576e-11	0.306557	0.254	0.131	1.48471e-06	1	Glyma.10G142500
7.15185e-11	-0.31595	0.083	0.215	1.95703e-06	1	Glyma.05G166800
8.59908e-11	-0.348484	0.089	0.221	2.35305e-06	1	Glyma.01G030500
8.61793e-11	-0.357659	0.163	0.309	2.35821e-06	1	Glyma.09G087700
8.62671e-11	-0.367888	0.229	0.376	2.36061e-06	1	Glyma.10G042000
1.03855e-10	0.290826	0.301	0.165	2.84188e-06	1	Glyma.14G074700
1.30671e-10	0.292957	0.244	0.127	3.57569e-06	1	Glyma.14G217200
1.62234e-10	-0.304165	0.083	0.213	4.43937e-06	1	Glyma.14G110000
1.65998e-10	-0.328196	0.1	0.234	4.54238e-06	1	Glyma.02G035000
1.74445e-10	-0.346743	0.208	0.36	4.77352e-06	1	Glyma.01G180800
2.06502e-10	0.309866	0.227	0.116	5.65071e-06	1	Glyma.06G284900
2.08669e-10	0.289023	0.252	0.133	5.71001e-06	1	Glyma.09G199000
2.30552e-10	-0.353379	0.167	0.305	6.30882e-06	1	Glyma.11G111100
2.33908e-10	0.339563	0.314	0.183	6.40066e-06	1	Glyma.10G169300
2.58036e-10	0.325566	0.383	0.249	7.0609e-06	1	Glyma.13G142400
2.71232e-10	-0.328958	0.339	0.472	7.42198e-06	1	Glyma.09G250800
2.74275e-10	0.268658	0.606	0.486	7.50526e-06	1	Glyma.06G295700
2.85619e-10	-0.32682	0.299	0.451	7.81567e-06	1	Glyma.16G017400
2.96325e-10	0.253131	0.206	0.099	8.10865e-06	1	Glyma.17G163800
3.06605e-10	-0.331571	0.229	0.378	8.38994e-06	1	Glyma.19G123800
3.69863e-10	-0.334234	0.233	0.381	1.01209e-05	1	Glyma.07G060700
3.71516e-10	-0.344631	0.167	0.307	1.01662e-05	1	Glyma.13G129500
3.94223e-10	-0.334125	0.309	0.446	1.07875e-05	1	Glyma.06G150300
4.10026e-10	-0.327516	0.14	0.279	1.12199e-05	1	Glyma.03G144500
4.17679e-10	-0.321138	0.299	0.446	1.14294e-05	1	Glyma.10G177200
4.35707e-10	-0.316472	0.121	0.255	1.19227e-05	1	Glyma.09G167900
4.87135e-10	-0.330857	0.286	0.428	1.333e-05	1	Glyma.18G241700
5.5012e-10	-0.320593	0.186	0.335	1.50535e-05	1	Glyma.02G038100
6.0557e-10	-0.335797	0.21	0.349	1.65708e-05	1	Glyma.01G010200
6.89236e-10	-0.337655	0.081	0.2	1.88603e-05	1	Glyma.12G133700
7.22955e-10	0.283342	0.248	0.134	1.97829e-05	1	Glyma.02G232600
8.11422e-10	-0.325317	0.297	0.436	2.22037e-05	1	Glyma.04G055300
8.17474e-10	0.306155	0.487	0.335	2.23694e-05	1	Glyma.19G136400
8.45415e-10	-0.35232	0.21	0.341	2.31339e-05	1	Glyma.05G172300
8.46777e-10	-0.287608	0.419	0.54	2.31712e-05	1	Glyma.16G205200
8.88891e-10	-0.29556	0.104	0.235	2.43236e-05	1	Glyma.08G063800
9.18604e-10	-0.324587	0.131	0.271	2.51367e-05	1	Glyma.06G321900
1.02979e-09	-0.308442	0.112	0.246	2.81791e-05	1	Glyma.14G222500
1.132e-09	-0.283803	0.43	0.539	3.0976e-05	1	Glyma.12G037400
1.18919e-09	-0.329784	0.203	0.343	3.2541e-05	1	Glyma.12G219300
1.48843e-09	-0.327096	0.169	0.305	4.07293e-05	1	Glyma.13G302900
1.63998e-09	-0.32724	0.246	0.381	4.48763e-05	1	Glyma.16G016100
1.72304e-09	-0.316588	0.292	0.432	4.71494e-05	1	Glyma.04G008300
1.94941e-09	-0.362497	0.203	0.328	5.33438e-05	1	Glyma.15G174200
2.18176e-09	-0.324657	0.271	0.405	5.97016e-05	1	Glyma.13G282000
2.31211e-09	-0.322819	0.191	0.331	6.32687e-05	1	Glyma.18G114900
2.34931e-09	-0.311289	0.22	0.367	6.42865e-05	1	Glyma.01G089300
2.94661e-09	-0.288858	0.093	0.216	8.06312e-05	1	Glyma.19G181300
2.97848e-09	-0.304377	0.212	0.359	8.1503e-05	1	Glyma.14G021800
3.09446e-09	-0.354823	0.119	0.238	8.46769e-05	1	Glyma.15G160700
3.28452e-09	0.29561	0.358	0.227	8.98777e-05	1	Glyma.13G157300
3.53686e-09	-0.302988	0.1	0.218	9.67826e-05	1	Glyma.01G182700
3.56846e-09	0.264477	0.216	0.113	9.76473e-05	1	Glyma.14G200200
4.39281e-09	-0.317289	0.199	0.335	0.000120205	1	Glyma.08G175800
4.83606e-09	-0.283755	0.144	0.284	0.000132334	1	Glyma.02G292800
5.61368e-09	-0.351468	0.286	0.397	0.000153613	1	Glyma.08G126800
5.92084e-09	-0.313001	0.155	0.28	0.000162018	1	Glyma.06G015900
6.629e-09	-0.343827	0.201	0.33	0.000181396	1	Glyma.05G168400
6.92914e-09	-0.299403	0.146	0.277	0.000189609	1	Glyma.17G100700
7.15938e-09	0.316473	0.352	0.225	0.000195909	1	Glyma.06G263900
7.47064e-09	-0.306308	0.119	0.241	0.000204426	1	Glyma.03G159100
8.56921e-09	0.308702	0.367	0.246	0.000234488	1	Glyma.09G078700
9.11237e-09	-0.33199	0.155	0.281	0.000249351	1	Glyma.07G149600
9.8194e-09	0.295391	0.326	0.215	0.000268698	1	Glyma.08G008100
1.24943e-08	-0.308852	0.182	0.314	0.000341894	1	Glyma.18G116900
1.26498e-08	0.280402	0.248	0.142	0.00034615	1	Glyma.09G061900
1.5184e-08	-0.307462	0.252	0.382	0.000415496	1	Glyma.06G109200
1.71139e-08	-0.261821	0.415	0.521	0.000468304	1	Glyma.01G115900
1.72349e-08	-0.303525	0.14	0.262	0.000471615	1	Glyma.03G219400
1.93325e-08	-0.262837	0.097	0.216	0.000529015	1	Glyma.10G002600
1.9999e-08	-0.289556	0.123	0.241	0.000547252	1	Glyma.01G038600
2.09844e-08	-0.295886	0.142	0.265	0.000574216	1	Glyma.06G067000
2.18793e-08	-0.297432	0.15	0.28	0.000598706	1	Glyma.12G199400
2.41418e-08	-0.29103	0.208	0.34	0.000660618	1	Glyma.03G262300
2.42642e-08	0.271555	0.354	0.225	0.000663966	1	Glyma.05G215900
2.79209e-08	-0.262667	0.087	0.2	0.000764027	1	Glyma.11G151300
2.86224e-08	-0.284331	0.299	0.432	0.000783224	1	Glyma.02G048666
2.87718e-08	-0.298529	0.169	0.296	0.00078731	1	Glyma.12G092000
3.0224e-08	-0.294542	0.261	0.385	0.000827051	1	Glyma.09G210900
3.06946e-08	-0.298795	0.184	0.312	0.000839928	1	Glyma.02G282500
3.17297e-08	-0.277424	0.125	0.242	0.000868252	1	Glyma.05G048000
3.61794e-08	-0.286953	0.108	0.22	0.000990014	1	Glyma.15G275700
4.72291e-08	-0.263233	0.095	0.207	0.00129238	1	Glyma.01G199700
5.22909e-08	-0.299895	0.199	0.321	0.00143089	1	Glyma.04G065600
5.91831e-08	0.255065	0.252	0.147	0.00161949	1	Glyma.06G105000
6.08321e-08	-0.259827	0.131	0.251	0.00166461	1	Glyma.07G201300
7.76318e-08	-0.287899	0.203	0.328	0.00212432	1	Glyma.06G194900
7.84714e-08	0.279467	0.413	0.298	0.00214729	1	Glyma.06G127400
7.95036e-08	0.3002	0.318	0.211	0.00217554	1	Glyma.17G073200
8.49754e-08	0.266059	0.426	0.295	0.00232527	1	Glyma.02G268000
8.78929e-08	-0.29101	0.138	0.252	0.0024051	1	Glyma.03G246300
9.20357e-08	-0.296313	0.114	0.222	0.00251847	1	Glyma.09G073900
1.02808e-07	-0.304184	0.284	0.391	0.00281325	1	Glyma.15G253700
1.06653e-07	-0.313284	0.153	0.261	0.00291844	1	Glyma.11G160484
1.17384e-07	-0.268662	0.146	0.264	0.00321211	1	Glyma.07G055900
1.27059e-07	-0.262333	0.106	0.212	0.00347684	1	Glyma.09G066200
1.28622e-07	-0.280728	0.222	0.347	0.00351961	1	Glyma.18G030400
1.37414e-07	-0.279277	0.311	0.431	0.00376021	1	Glyma.11G111400
1.4457e-07	-0.275649	0.248	0.376	0.00395602	1	Glyma.01G026700
1.45872e-07	0.247939	0.258	0.156	0.00399164	1	Glyma.09G267100
1.54183e-07	-0.285681	0.271	0.387	0.00421907	1	Glyma.02G305400
1.55526e-07	-0.246952	0.108	0.216	0.00425582	1	Glyma.18G244900
1.6476e-07	-0.23497	0.095	0.202	0.00450849	1	Glyma.13G294300
1.71687e-07	0.241893	0.331	0.213	0.00469804	1	Glyma.07G091800
1.8073e-07	-0.263066	0.125	0.234	0.0049455	1	Glyma.15G016300
1.85742e-07	-0.275245	0.214	0.337	0.00508264	1	Glyma.07G047600
1.91959e-07	-0.28561	0.25	0.365	0.00525276	1	Glyma.08G180000
1.93037e-07	-0.298196	0.104	0.206	0.00528226	1	Glyma.06G264900
2.2658e-07	-0.279867	0.146	0.258	0.00620013	1	Glyma.04G066000
2.27983e-07	-0.286012	0.225	0.343	0.00623853	1	Glyma.02G141700
2.31376e-07	-0.291423	0.203	0.314	0.00633137	1	Glyma.10G032200
2.39856e-07	-0.255488	0.339	0.476	0.00656342	1	Glyma.03G137000
2.41377e-07	-0.264274	0.119	0.225	0.00660505	1	Glyma.14G010900
2.62439e-07	-0.268507	0.282	0.403	0.00718138	1	Glyma.19G139300
2.68728e-07	-0.277692	0.155	0.266	0.00735348	1	Glyma.04G015900
2.79088e-07	0.251307	0.347	0.234	0.00763697	1	Glyma.06G098300
2.98217e-07	-0.277334	0.309	0.421	0.0081604	1	Glyma.04G112800
3.00893e-07	-0.234294	0.095	0.2	0.00823363	1	Glyma.19G260600
3.12717e-07	0.258636	0.337	0.229	0.00855718	1	Glyma.04G012700
3.18448e-07	-0.26999	0.299	0.42	0.00871401	1	Glyma.13G129400
3.19159e-07	-0.24655	0.104	0.208	0.00873346	1	Glyma.10G281400
3.3115e-07	-0.268878	0.157	0.266	0.00906158	1	Glyma.16G024600
3.39756e-07	-0.269153	0.227	0.345	0.00929708	1	Glyma.07G048500
3.4329e-07	-0.276668	0.189	0.3	0.00939379	1	Glyma.10G042100
3.4347e-07	-0.25848	0.271	0.392	0.00939871	1	Glyma.03G119500
3.44037e-07	-0.273138	0.303	0.412	0.00941422	1	Glyma.15G261900
3.51527e-07	-0.268709	0.144	0.257	0.00961919	1	Glyma.16G095000
3.57951e-07	-0.277428	0.174	0.284	0.00979498	1	Glyma.19G161400
4.27996e-07	-0.270134	0.28	0.399	0.0117117	1	Glyma.07G038500
4.30008e-07	0.239439	0.278	0.177	0.0117667	1	Glyma.03G247400
4.4963e-07	0.240617	0.513	0.384	0.0123037	1	Glyma.04G229900
5.05439e-07	-0.244717	0.144	0.255	0.0138308	1	Glyma.20G212900
5.07766e-07	-0.210975	0.525	0.636	0.0138945	1	Glyma.16G065300
6.87615e-07	-0.245598	0.178	0.296	0.0188159	1	Glyma.18G150000
7.22189e-07	-0.258092	0.271	0.397	0.019762	1	Glyma.16G145800
7.34184e-07	-0.251666	0.186	0.307	0.0200902	1	Glyma.08G165500
7.40044e-07	0.224661	0.288	0.185	0.0202506	1	Glyma.15G212800
7.46373e-07	-0.254747	0.284	0.407	0.0204238	1	Glyma.14G094700
7.59965e-07	0.237367	0.468	0.354	0.0207957	1	Glyma.11G154900
9.11155e-07	-0.237436	0.114	0.216	0.0249329	1	Glyma.19G147400
9.95397e-07	-0.235844	0.127	0.231	0.0272381	1	Glyma.13G169500
9.98792e-07	-0.250959	0.191	0.307	0.0273309	1	Glyma.10G078400
1.05535e-06	-0.222631	0.117	0.223	0.0288786	1	Glyma.20G082800
1.15245e-06	-0.272513	0.229	0.335	0.0315358	1	Glyma.15G275600
1.27159e-06	-0.261522	0.261	0.369	0.0347957	1	Glyma.04G215800
1.34816e-06	-0.277373	0.18	0.286	0.0368909	1	Glyma.12G169600
1.38986e-06	-0.220708	0.114	0.215	0.0380321	1	Glyma.05G051300
1.39228e-06	-0.244093	0.117	0.218	0.0380984	1	Glyma.20G008600
1.68054e-06	-0.219661	0.123	0.228	0.0459862	1	Glyma.11G135900
1.84757e-06	-0.270728	0.282	0.389	0.050557	1	Glyma.05G092300
2.04077e-06	-0.236004	0.163	0.272	0.0558436	1	Glyma.20G243500
2.22932e-06	-0.259201	0.218	0.325	0.0610032	1	Glyma.03G230000
2.51856e-06	0.220043	0.356	0.245	0.0689178	1	Glyma.06G173500
2.78299e-06	-0.251528	0.169	0.272	0.0761537	1	Glyma.06G113200
3.46782e-06	-0.247064	0.163	0.264	0.0948934	1	Glyma.05G026200
3.57058e-06	-0.243029	0.303	0.409	0.0977052	1	Glyma.03G060300
3.80074e-06	-0.237513	0.201	0.313	0.104003	1	Glyma.10G293500
4.17826e-06	0.22084	0.468	0.367	0.114334	1	Glyma.19G186100
6.79709e-06	0.216833	0.449	0.346	0.185996	1	Glyma.09G083800
7.41543e-06	-0.224585	0.193	0.296	0.202916	1	Glyma.13G175100
1.19822e-05	-0.225348	0.252	0.357	0.327881	1	Glyma.13G028200
1.63114e-05	-0.231668	0.25	0.351	0.446345	1	Glyma.14G115500
5.17643e-40	0.693714	0.396	0.123	1.41648e-35	2	Glyma.16G031600
3.88621e-29	0.552488	0.245	0.062	1.06342e-24	2	Glyma.06G275000
1.60604e-25	0.425633	0.205	0.048	4.39478e-21	2	Glyma.11G020700
2.66068e-25	0.508906	0.288	0.097	7.28068e-21	2	Glyma.15G203900
3.79993e-22	0.45165	0.655	0.441	1.03981e-17	2	Glyma.20G247850
8.67236e-21	0.517311	0.569	0.339	2.3731e-16	2	Glyma.16G071500
1.10323e-18	0.389471	0.208	0.065	3.01888e-14	2	Glyma.07G102700
4.06597e-18	0.491136	0.307	0.133	1.11261e-13	2	Glyma.08G309900
8.15609e-17	0.442284	0.291	0.129	2.23183e-12	2	Glyma.08G291000
1.04141e-16	-0.513884	0.283	0.483	2.84972e-12	2	Glyma.04G020300
1.41388e-14	0.424933	0.464	0.294	3.86893e-10	2	Glyma.06G127400
8.17459e-14	0.392872	0.256	0.115	2.23689e-09	2	Glyma.14G049500
1.81103e-13	0.418979	0.278	0.132	4.95569e-09	2	Glyma.13G265700
2.21967e-13	-0.406272	0.367	0.546	6.0739e-09	2	Glyma.12G037400
2.3378e-13	0.358572	0.232	0.097	6.39714e-09	2	Glyma.16G033900
2.85935e-13	0.417832	0.264	0.125	7.82432e-09	2	Glyma.11G119500
6.29231e-13	-0.429247	0.286	0.471	1.72183e-08	2	Glyma.02G309500
7.51265e-13	-0.342408	0.518	0.645	2.05576e-08	2	Glyma.15G057600
1.22309e-12	0.392483	0.313	0.164	3.34688e-08	2	Glyma.11G096700
4.21287e-12	-0.316727	0.52	0.666	1.15281e-07	2	Glyma.11G221000
4.25092e-12	-0.419382	0.135	0.317	1.16322e-07	2	Glyma.18G116900
6.90224e-12	0.356401	0.205	0.088	1.88873e-07	2	Glyma.14G204700
1.42812e-11	-0.421365	0.245	0.419	3.90792e-07	2	Glyma.15G194300
2.31547e-11	-0.482361	0.065	0.21	6.33606e-07	2	Glyma.16G091100
2.6537e-11	-0.336966	0.442	0.593	7.26159e-07	2	Glyma.18G036400
4.13235e-11	-0.440917	0.24	0.4	1.13078e-06	2	Glyma.08G126800
4.74874e-11	-0.320367	0.606	0.762	1.29945e-06	2	Glyma.20G058901
6.27857e-11	-0.350046	0.412	0.552	1.71807e-06	2	Glyma.09G154700
1.02145e-10	-0.371036	0.329	0.499	2.7951e-06	2	Glyma.02G064700
1.59074e-10	-0.383284	0.102	0.255	4.35291e-06	2	Glyma.04G249700
1.67303e-10	-0.372429	0.173	0.35	4.57808e-06	2	Glyma.18G030400
3.34777e-10	0.328591	0.224	0.108	9.16082e-06	2	Glyma.11G034000
4.47356e-10	-0.314483	0.447	0.605	1.22414e-05	2	Glyma.19G007700
5.63035e-10	0.379706	0.28	0.159	1.54069e-05	2	Glyma.17G250800
5.88115e-10	-0.381171	0.17	0.329	1.60932e-05	2	Glyma.03G230000
8.41421e-10	0.356707	0.216	0.104	2.30246e-05	2	Glyma.09G053700
1.03618e-09	-0.36935	0.216	0.376	2.8354e-05	2	Glyma.07G060700
1.08291e-09	-0.377857	0.173	0.327	2.96328e-05	2	Glyma.07G019700
1.20246e-09	-0.352175	0.078	0.215	3.29041e-05	2	Glyma.01G030500
1.339e-09	-0.358456	0.111	0.257	3.66405e-05	2	Glyma.16G095000
1.54021e-09	0.357131	0.318	0.197	4.21464e-05	2	Glyma.18G226500
1.59814e-09	-0.366329	0.181	0.339	4.37316e-05	2	Glyma.05G172300
1.78783e-09	-0.355292	0.259	0.418	4.89221e-05	2	Glyma.13G210800
1.97876e-09	-0.367458	0.151	0.302	5.41467e-05	2	Glyma.13G129500
2.00789e-09	-0.350998	0.243	0.404	5.4944e-05	2	Glyma.19G139300
2.11703e-09	-0.374049	0.17	0.32	5.79303e-05	2	Glyma.04G065600
2.91246e-09	-0.363435	0.162	0.311	7.96965e-05	2	Glyma.06G055500
3.06828e-09	0.329871	0.526	0.406	8.39603e-05	2	Glyma.18G226850
3.56755e-09	-0.289029	0.461	0.602	9.76223e-05	2	Glyma.07G112000
3.67325e-09	-0.376922	0.146	0.287	0.000100515	2	Glyma.12G169600
3.85315e-09	0.297982	0.221	0.111	0.000105438	2	Glyma.08G222200
4.14059e-09	-0.357376	0.27	0.423	0.000113303	2	Glyma.18G241700
4.33178e-09	-0.338023	0.175	0.329	0.000118535	2	Glyma.02G038100
5.04583e-09	-0.328777	0.102	0.243	0.000138074	2	Glyma.03G261500
6.03278e-09	-0.339269	0.151	0.299	0.000165081	2	Glyma.16G189500
6.23403e-09	0.301598	0.256	0.138	0.000170588	2	Glyma.18G082800
8.43843e-09	-0.378081	0.183	0.326	0.000230909	2	Glyma.05G168400
8.72622e-09	-0.348505	0.291	0.435	0.000238784	2	Glyma.10G249000
9.22329e-09	-0.323158	0.383	0.52	0.000252386	2	Glyma.08G173700
1.03125e-08	-0.344491	0.092	0.221	0.00028219	2	Glyma.09G073900
1.10596e-08	-0.336632	0.307	0.438	0.000302636	2	Glyma.06G150300
1.11385e-08	-0.352619	0.113	0.246	0.000304795	2	Glyma.06G089700
1.12334e-08	-0.345288	0.148	0.291	0.000307391	2	Glyma.15G052400
1.15083e-08	-0.352031	0.245	0.393	0.000314914	2	Glyma.15G253700
1.329e-08	-0.347851	0.275	0.422	0.000363669	2	Glyma.04G112800
1.44591e-08	-0.338869	0.159	0.301	0.00039566	2	Glyma.16G089000
1.46226e-08	-0.332139	0.121	0.259	0.000400133	2	Glyma.03G219400
1.56076e-08	0.314423	0.442	0.321	0.000427085	2	Glyma.09G173400
2.07655e-08	-0.32487	0.173	0.327	0.000568226	2	Glyma.18G114900
2.23615e-08	-0.339227	0.259	0.4	0.000611901	2	Glyma.13G282000
2.37632e-08	-0.319733	0.275	0.428	0.000650256	2	Glyma.16G143600
2.43e-08	-0.326724	0.226	0.373	0.000664944	2	Glyma.01G026700
2.97296e-08	-0.3225	0.105	0.237	0.000813521	2	Glyma.11G099300
3.14444e-08	-0.297844	0.089	0.218	0.000860446	2	Glyma.20G008600
3.30412e-08	-0.26732	0.488	0.603	0.000904138	2	Glyma.05G022900
3.47515e-08	0.339041	0.296	0.178	0.000950939	2	Glyma.15G160300
3.56747e-08	-0.459605	0.111	0.23	0.000976202	2	Glyma.15G101800
3.78096e-08	-0.342586	0.205	0.341	0.00103462	2	Glyma.02G141700
3.83678e-08	-0.322501	0.146	0.284	0.0010499	2	Glyma.19G161400
4.18345e-08	-0.308456	0.342	0.479	0.00114476	2	Glyma.16G044900
4.39101e-08	-0.330693	0.229	0.369	0.00120156	2	Glyma.04G215800
4.68035e-08	-0.336374	0.199	0.345	0.00128073	2	Glyma.18G057900
4.83178e-08	-0.312702	0.278	0.427	0.00132217	2	Glyma.04G008300
4.9012e-08	-0.328811	0.28	0.412	0.00134116	2	Glyma.06G020400
5.33718e-08	-0.291227	0.097	0.224	0.00146047	2	Glyma.14G010900
7.73682e-08	-0.299704	0.124	0.256	0.0021171	2	Glyma.17G130100
8.82658e-08	-0.33362	0.288	0.427	0.00241531	2	Glyma.16G165200
1.03436e-07	-0.314822	0.143	0.274	0.00283043	2	Glyma.12G199400
1.30296e-07	-0.312893	0.199	0.333	0.00356543	2	Glyma.07G047600
1.43856e-07	-0.325717	0.121	0.246	0.00393647	2	Glyma.20G150600
1.56933e-07	-0.268246	0.089	0.21	0.00429431	2	Glyma.19G181300
1.71785e-07	-0.303908	0.162	0.298	0.00470072	2	Glyma.11G111100
1.99022e-07	-0.289914	0.124	0.256	0.00544604	2	Glyma.04G066000
2.04664e-07	-0.313955	0.197	0.328	0.00560044	2	Glyma.08G175800
2.07825e-07	-0.289386	0.129	0.259	0.00568692	2	Glyma.11G226900
2.12804e-07	-0.321793	0.253	0.389	0.00582317	2	Glyma.05G092300
2.21288e-07	-0.315087	0.178	0.314	0.00605532	2	Glyma.05G092000
2.21625e-07	-0.310051	0.291	0.417	0.00606456	2	Glyma.04G167900
2.32203e-07	-0.296614	0.337	0.465	0.00635401	2	Glyma.09G250800
2.35131e-07	-0.293636	0.108	0.229	0.00643412	2	Glyma.05G011200
2.38494e-07	-0.285515	0.156	0.295	0.00652616	2	Glyma.15G250800
2.68639e-07	-0.310236	0.218	0.349	0.00735104	2	Glyma.01G180800
3.20379e-07	-0.300363	0.208	0.341	0.00876685	2	Glyma.01G010200
3.3029e-07	-0.267385	0.429	0.558	0.00903806	2	Glyma.19G106800
3.57806e-07	0.290476	0.353	0.24	0.009791	2	Glyma.07G077700
3.80351e-07	-0.228227	0.539	0.651	0.0104079	2	Glyma.11G168010
4.07914e-07	-0.334571	0.199	0.321	0.0111621	2	Glyma.15G174200
5.09883e-07	-0.317318	0.199	0.322	0.0139524	2	Glyma.06G194900
5.60611e-07	-0.275613	0.137	0.26	0.0153406	2	Glyma.01G214300
5.67155e-07	-0.318353	0.213	0.332	0.0155196	2	Glyma.15G275600
5.99912e-07	-0.289252	0.146	0.271	0.016416	2	Glyma.06G113200
6.08347e-07	-0.216032	0.598	0.705	0.0166468	2	Glyma.11G218300
6.8704e-07	-0.304328	0.143	0.26	0.0188002	2	Glyma.06G321900
7.52386e-07	-0.25053	0.1	0.215	0.0205883	2	Glyma.17G137600
8.11557e-07	-0.282559	0.291	0.434	0.0222075	2	Glyma.03G094400
8.13753e-07	-0.284233	0.186	0.319	0.0222675	2	Glyma.14G213500
8.2269e-07	-0.307682	0.243	0.364	0.0225121	2	Glyma.10G042000
9.38936e-07	-0.280338	0.143	0.267	0.025693	2	Glyma.02G198400
1.13526e-06	0.283182	0.321	0.21	0.0310653	2	Glyma.07G065600
1.43989e-06	0.293301	0.296	0.193	0.0394011	2	Glyma.15G160700
1.48877e-06	-0.251462	0.399	0.504	0.0407387	2	Glyma.11G181100
1.53752e-06	-0.270169	0.175	0.304	0.0420728	2	Glyma.10G078400
1.73421e-06	-0.279777	0.296	0.414	0.047455	2	Glyma.13G129400
1.81176e-06	-0.249404	0.415	0.534	0.0495771	2	Glyma.16G205200
1.93322e-06	-0.278685	0.232	0.363	0.0529008	2	Glyma.11G061300
2.46043e-06	-0.27819	0.183	0.304	0.0673271	2	Glyma.02G282500
2.53981e-06	-0.231962	0.469	0.587	0.0694994	2	Glyma.15G274900
2.95619e-06	-0.258225	0.216	0.35	0.0808933	2	Glyma.10G174800
3.05762e-06	-0.277027	0.261	0.391	0.0836686	2	Glyma.16G145800
3.08992e-06	-0.282156	0.208	0.327	0.0845526	2	Glyma.20G144700
3.27488e-06	-0.260797	0.116	0.225	0.0896139	2	Glyma.06G067400
3.33299e-06	-0.231704	0.496	0.602	0.0912038	2	Glyma.05G007100
3.34405e-06	-0.257557	0.159	0.277	0.0915066	2	Glyma.01G145400
3.39727e-06	-0.267264	0.259	0.388	0.0929629	2	Glyma.03G119500
3.43309e-06	-0.262815	0.275	0.406	0.0939431	2	Glyma.08G274400
3.72445e-06	0.2573	0.313	0.209	0.101916	2	Glyma.09G054200
3.72551e-06	-0.27603	0.237	0.358	0.101945	2	Glyma.02G249600
3.73755e-06	-0.257933	0.146	0.262	0.102274	2	Glyma.05G026200
4.03536e-06	-0.260475	0.143	0.257	0.110424	2	Glyma.06G067000
4.263e-06	-0.248836	0.146	0.265	0.116653	2	Glyma.08G074000
4.4008e-06	-0.234788	0.102	0.209	0.120424	2	Glyma.10G193500
4.74763e-06	-0.231706	0.1	0.202	0.129914	2	Glyma.10G281400
4.86217e-06	-0.257859	0.283	0.41	0.133048	2	Glyma.15G261900
4.86645e-06	-0.282491	0.183	0.295	0.133165	2	Glyma.10G042100
5.6174e-06	-0.24986	0.412	0.547	0.153715	2	Glyma.19G187300
5.75537e-06	-0.245831	0.102	0.205	0.15749	2	Glyma.05G092200
5.77797e-06	-0.247837	0.191	0.313	0.158108	2	Glyma.08G302600
5.78607e-06	-0.219868	0.105	0.211	0.15833	2	Glyma.18G244900
6.79265e-06	0.242753	0.288	0.187	0.185874	2	Glyma.14G026300
7.05786e-06	-0.234137	0.404	0.511	0.193131	2	Glyma.03G114600
7.59175e-06	-0.258859	0.291	0.405	0.207741	2	Glyma.03G060300
7.61406e-06	-0.268504	0.162	0.271	0.208351	2	Glyma.08G204800
8.85299e-06	-0.256297	0.251	0.372	0.242253	2	Glyma.16G016100
1.06225e-05	-0.262503	0.183	0.296	0.290673	2	Glyma.09G087700
1.12871e-05	-0.236845	0.129	0.234	0.308859	2	Glyma.05G048000
1.52793e-05	-0.21381	0.14	0.254	0.418102	2	Glyma.05G055500
1.53483e-05	-0.201028	0.515	0.621	0.419991	2	Glyma.12G232200
1.63315e-05	-0.241013	0.291	0.413	0.446894	2	Glyma.13G245200
1.65324e-05	-0.257368	0.264	0.382	0.452392	2	Glyma.02G305400
1.98253e-05	-0.223666	0.135	0.239	0.542499	2	Glyma.12G232700
1.99671e-05	-0.251376	0.191	0.298	0.546381	2	Glyma.08G165500
2.11336e-05	-0.250096	0.143	0.244	0.578301	2	Glyma.03G246300
2.24762e-05	-0.232081	0.194	0.308	0.615038	2	Glyma.10G293500
2.28459e-05	-0.244677	0.186	0.293	0.625156	2	Glyma.17G012000
2.48599e-05	-0.248433	0.31	0.425	0.680265	2	Glyma.04G055300
2.52919e-05	-0.241687	0.267	0.384	0.692087	2	Glyma.08G328800
3.27278e-05	-0.255702	0.205	0.307	0.895564	2	Glyma.10G032200
4.16699e-05	-0.239415	0.261	0.377	1	2	Glyma.09G210900
4.91999e-05	-0.207455	0.178	0.289	1	2	Glyma.18G150000
5.68469e-05	-0.202911	0.154	0.257	1	2	Glyma.04G053700
7.41214e-05	-0.213055	0.391	0.519	1	2	Glyma.13G068600
8.32881e-05	-0.233994	0.283	0.391	1	2	Glyma.07G038500
0.000109236	-0.201787	0.186	0.291	1	2	Glyma.20G196900
0.000130005	-0.214698	0.291	0.4	1	2	Glyma.11G154900
0.000141024	-0.202534	0.175	0.276	1	2	Glyma.09G190300
0.00016096	-0.202419	0.251	0.369	1	2	Glyma.18G155400
0.000205464	-0.207385	0.41	0.515	1	2	Glyma.06G223500
1.14547e-73	0.635753	0.918	0.645	3.13445e-69	3	Glyma.11G218300
2.2669e-62	0.636285	0.886	0.6	6.20314e-58	3	Glyma.09G133950
8.83402e-55	0.598356	0.896	0.705	2.41734e-50	3	Glyma.20G058901
6.05568e-51	0.824726	0.652	0.321	1.65708e-46	3	Glyma.08G126800
5.17516e-47	0.833477	0.497	0.175	1.41613e-42	3	Glyma.20G150600
1.26645e-45	0.563326	0.794	0.591	3.46551e-41	3	Glyma.15G057600
4.08717e-41	0.625722	0.712	0.456	1.11841e-36	3	Glyma.08G173700
1.47781e-38	0.756982	0.544	0.257	4.04388e-34	3	Glyma.05G168400
1.68255e-38	0.657967	0.658	0.409	4.60413e-34	3	Glyma.04G020300
1.86136e-36	0.573847	0.316	0.078	5.09343e-32	3	Glyma.11G176000
2.4996e-36	0.657727	0.373	0.111	6.8399e-32	3	Glyma.18G065900
5.72503e-35	0.475069	0.788	0.613	1.5666e-30	3	Glyma.05G084525
1.30201e-34	0.535832	0.297	0.07	3.56283e-30	3	Glyma.09G067700
1.02706e-33	0.692586	0.497	0.22	2.81045e-29	3	Glyma.12G169600
1.16616e-33	0.644161	0.62	0.346	3.19108e-29	3	Glyma.15G194300
9.91242e-33	0.651677	0.411	0.147	2.71243e-28	3	Glyma.05G092200
1.32779e-32	0.53069	0.696	0.497	3.63338e-28	3	Glyma.09G154700
1.65648e-32	0.532904	0.699	0.481	4.53278e-28	3	Glyma.12G037400
2.39018e-32	0.643329	0.446	0.172	6.5405e-28	3	Glyma.11G099300
3.14305e-31	0.52588	0.313	0.086	8.60063e-27	3	Glyma.13G230600
3.32818e-31	0.430207	0.769	0.617	9.10723e-27	3	Glyma.11G221000
4.91405e-30	0.600535	0.418	0.155	1.34468e-25	3	Glyma.20G008600
1.20919e-29	0.447372	0.715	0.559	3.30884e-25	3	Glyma.05G022900
1.66844e-29	0.468324	0.715	0.539	4.56552e-25	3	Glyma.18G036400
3.0316e-29	0.60208	0.585	0.353	8.29566e-25	3	Glyma.06G020400
3.14688e-29	0.62113	0.509	0.244	8.61112e-25	3	Glyma.06G055500
3.89448e-29	0.624852	0.443	0.187	1.06569e-24	3	Glyma.03G246300
4.3213e-29	0.403621	0.215	0.043	1.18248e-24	3	Glyma.11G001000
4.34977e-29	0.650104	0.513	0.25	1.19027e-24	3	Glyma.05G092000
8.26921e-29	-0.867197	0.108	0.451	2.26279e-24	3	Glyma.10G169600
1.19863e-28	0.631012	0.582	0.325	3.27992e-24	3	Glyma.05G092300
3.5003e-28	0.636711	0.43	0.185	9.57822e-24	3	Glyma.06G089700
5.4961e-28	0.510636	0.706	0.49	1.50395e-23	3	Glyma.19G187300
1.45736e-27	0.580499	0.316	0.1	3.98793e-23	3	Glyma.10G094600
1.7433e-27	0.504994	0.285	0.08	4.77037e-23	3	Glyma.10G243800
4.10116e-27	0.594969	0.465	0.21	1.12224e-22	3	Glyma.06G113200
4.20959e-27	0.364198	0.203	0.04	1.15191e-22	3	Glyma.04G202300
4.51858e-27	0.596844	0.519	0.274	1.23646e-22	3	Glyma.05G172300
1.43909e-26	0.600606	0.402	0.161	3.93792e-22	3	Glyma.09G073900
2.42302e-26	0.524547	0.617	0.406	6.63036e-22	3	Glyma.02G309500
2.6545e-26	0.50046	0.316	0.101	7.26377e-22	3	Glyma.19G090000
7.24436e-26	-0.74971	0.114	0.418	1.98235e-21	3	Glyma.17G104800
8.99601e-26	0.552425	0.598	0.376	2.46167e-21	3	Glyma.10G249000
9.38435e-26	0.554063	0.354	0.127	2.56793e-21	3	Glyma.10G089500
2.50374e-25	0.570356	0.437	0.19	6.85122e-21	3	Glyma.04G249700
6.89454e-25	0.391983	0.222	0.053	1.88662e-20	3	Glyma.11G192500
8.24491e-25	0.486899	0.301	0.096	2.25614e-20	3	Glyma.11G228800
9.38605e-25	0.521039	0.351	0.13	2.5684e-20	3	Glyma.18G028400
2.49909e-24	0.595785	0.5	0.264	6.8385e-20	3	Glyma.15G174200
2.80449e-24	0.43892	0.272	0.08	7.67421e-20	3	Glyma.17G046500
2.86289e-24	0.566721	0.5	0.256	7.83402e-20	3	Glyma.04G065600
4.2827e-24	0.572225	0.468	0.239	1.17192e-19	3	Glyma.11G111100
7.6179e-24	-0.776097	0.123	0.426	2.08456e-19	3	Glyma.16G071500
1.38989e-23	-0.683737	0.158	0.471	3.80329e-19	3	Glyma.06G265000
1.99373e-23	0.338031	0.203	0.046	5.45564e-19	3	Glyma.08G327500
3.39866e-23	0.562406	0.503	0.277	9.3001e-19	3	Glyma.15G275600
4.47404e-23	-0.678658	0.253	0.527	1.22428e-18	3	Glyma.08G264900
4.50729e-23	0.513154	0.576	0.37	1.23337e-18	3	Glyma.02G048666
6.77617e-23	0.486277	0.332	0.121	1.85423e-18	3	Glyma.17G075900
7.2529e-23	-0.715546	0.12	0.414	1.98468e-18	3	Glyma.19G136400
8.96595e-23	0.352469	0.203	0.048	2.45344e-18	3	Glyma.06G153400
9.742e-23	-0.748922	0.063	0.345	2.6658e-18	3	Glyma.03G134200
1.01954e-22	0.547866	0.497	0.264	2.78986e-18	3	Glyma.07G019700
1.14404e-22	0.48795	0.342	0.128	3.13055e-18	3	Glyma.20G116100
1.87547e-22	0.374675	0.722	0.591	5.13203e-18	3	Glyma.16G065300
2.09337e-22	0.524474	0.516	0.282	5.7283e-18	3	Glyma.01G010200
2.24202e-22	0.541497	0.532	0.308	6.13507e-18	3	Glyma.10G042000
3.20435e-22	0.350731	0.218	0.056	8.76839e-18	3	Glyma.01G243300
3.97193e-22	-0.676464	0.108	0.397	1.08688e-17	3	Glyma.11G148362
4.94389e-22	0.453313	0.291	0.099	1.35285e-17	3	Glyma.07G135300
6.67478e-22	0.41143	0.269	0.084	1.82649e-17	3	Glyma.04G253300
8.78556e-22	0.435237	0.652	0.488	2.40408e-17	3	Glyma.16G205200
1.20251e-21	0.445089	0.266	0.086	3.29056e-17	3	Glyma.07G163600
1.36595e-21	0.423109	0.272	0.087	3.73778e-17	3	Glyma.01G201000
1.75284e-21	0.464799	0.301	0.105	4.79646e-17	3	Glyma.03G120300
1.98476e-21	0.46589	0.335	0.125	5.4311e-17	3	Glyma.10G089300
2.15245e-21	0.438136	0.31	0.11	5.88996e-17	3	Glyma.10G026600
2.73351e-21	0.390935	0.244	0.073	7.47998e-17	3	Glyma.05G178000
3.26485e-21	0.52742	0.44	0.217	8.93394e-17	3	Glyma.12G199400
3.28768e-21	-0.64286	0.136	0.418	8.99641e-17	3	Glyma.13G027800
3.82407e-21	0.407046	0.272	0.088	1.04642e-16	3	Glyma.13G177900
5.42618e-21	0.521819	0.453	0.224	1.48482e-16	3	Glyma.19G161400
5.49567e-21	0.351442	0.222	0.061	1.50383e-16	3	Glyma.02G206700
6.37502e-21	0.394596	0.241	0.072	1.74446e-16	3	Glyma.06G236200
1.18223e-20	0.527498	0.424	0.206	3.23507e-16	3	Glyma.06G321900
1.35358e-20	0.337904	0.206	0.054	3.70395e-16	3	Glyma.15G082000
1.56408e-20	0.467237	0.595	0.414	4.27994e-16	3	Glyma.09G250800
1.68938e-20	0.399673	0.69	0.544	4.62281e-16	3	Glyma.15G274900
1.84335e-20	0.391371	0.247	0.077	5.04413e-16	3	Glyma.06G175400
1.84741e-20	0.518254	0.538	0.336	5.05525e-16	3	Glyma.15G253700
2.77928e-20	0.45217	0.604	0.427	7.60522e-16	3	Glyma.16G044900
3.40704e-20	0.435501	0.285	0.101	9.32303e-16	3	Glyma.09G072100
3.62239e-20	0.371146	0.234	0.069	9.91232e-16	3	Glyma.19G012900
4.9729e-20	0.353869	0.215	0.061	1.36078e-15	3	Glyma.20G085900
5.26905e-20	0.343761	0.212	0.058	1.44182e-15	3	Glyma.11G060900
5.47962e-20	-0.614406	0.13	0.412	1.49944e-15	3	Glyma.09G083800
5.51723e-20	0.506495	0.484	0.266	1.50974e-15	3	Glyma.18G114900
5.61714e-20	0.337943	0.203	0.054	1.53707e-15	3	Glyma.03G103600
6.25595e-20	0.456223	0.329	0.13	1.71188e-15	3	Glyma.06G176900
8.4135e-20	0.428031	0.288	0.104	2.30227e-15	3	Glyma.01G182600
1.03582e-19	-0.631294	0.149	0.406	2.83443e-15	3	Glyma.14G142300
1.21058e-19	0.520146	0.475	0.27	3.31264e-15	3	Glyma.03G230000
1.32278e-19	0.396994	0.259	0.086	3.61965e-15	3	Glyma.09G077600
1.70442e-19	-0.605882	0.073	0.327	4.66397e-15	3	Glyma.06G202500
2.6825e-19	-0.635621	0.104	0.363	7.34038e-15	3	Glyma.06G127400
2.84242e-19	0.509614	0.503	0.297	7.77801e-15	3	Glyma.14G115500
3.11096e-19	0.417643	0.282	0.101	8.51282e-15	3	Glyma.08G364600
3.38839e-19	0.503088	0.449	0.236	9.27198e-15	3	Glyma.07G079000
3.63261e-19	-0.673234	0.051	0.29	9.94027e-15	3	Glyma.06G263900
3.74487e-19	0.458155	0.345	0.143	1.02475e-14	3	Glyma.11G151300
3.98306e-19	0.374154	0.222	0.066	1.08993e-14	3	Glyma.15G185000
4.11447e-19	0.399702	0.247	0.081	1.12588e-14	3	Glyma.19G190800
4.48816e-19	0.341317	0.234	0.072	1.22814e-14	3	Glyma.15G016400
5.24882e-19	0.495084	0.437	0.218	1.43629e-14	3	Glyma.08G204800
5.66686e-19	0.393124	0.25	0.083	1.55068e-14	3	Glyma.17G084300
6.95e-19	0.474496	0.377	0.171	1.9018e-14	3	Glyma.04G188700
8.00924e-19	0.488768	0.415	0.204	2.19165e-14	3	Glyma.11G226900
8.78774e-19	0.373205	0.25	0.082	2.40468e-14	3	Glyma.15G209000
9.82275e-19	0.407038	0.275	0.099	2.6879e-14	3	Glyma.03G152200
1.20513e-18	0.455768	0.32	0.132	3.29771e-14	3	Glyma.15G107900
1.24077e-18	0.377421	0.256	0.087	3.39525e-14	3	Glyma.01G205400
1.35516e-18	0.465917	0.547	0.358	3.70825e-14	3	Glyma.15G261900
1.36409e-18	0.445452	0.342	0.145	3.7327e-14	3	Glyma.04G035900
1.39391e-18	0.448083	0.32	0.129	3.8143e-14	3	Glyma.14G072400
1.43895e-18	0.327449	0.218	0.065	3.93756e-14	3	Glyma.12G182800
1.80423e-18	0.323617	0.231	0.071	4.9371e-14	3	Glyma.17G247300
2.01933e-18	-0.57258	0.057	0.302	5.5257e-14	3	Glyma.13G027300
2.25107e-18	0.445673	0.326	0.134	6.15982e-14	3	Glyma.19G216300
4.31229e-18	-0.553246	0.057	0.296	1.18001e-13	3	Glyma.06G098300
4.33459e-18	0.432217	0.31	0.126	1.18612e-13	3	Glyma.16G029300
5.36758e-18	0.465747	0.361	0.164	1.46878e-13	3	Glyma.15G275700
5.6326e-18	-0.600359	0.161	0.421	1.5413e-13	3	Glyma.05G079700
5.6992e-18	-0.571188	0.098	0.346	1.55953e-13	3	Glyma.12G073900
1.01377e-17	-0.644941	0.089	0.328	2.77407e-13	3	Glyma.06G259400
1.01642e-17	0.456192	0.389	0.184	2.78134e-13	3	Glyma.14G222500
1.30761e-17	-0.602192	0.028	0.245	3.57814e-13	3	Glyma.10G169300
1.33037e-17	0.463611	0.408	0.201	3.64041e-13	3	Glyma.17G130100
1.63976e-17	0.417489	0.285	0.11	4.48704e-13	3	Glyma.10G058500
1.84476e-17	0.339251	0.237	0.079	5.04799e-13	3	Glyma.04G226900
1.88983e-17	-0.584493	0.13	0.381	5.17132e-13	3	Glyma.09G173400
2.03414e-17	-0.569389	0.127	0.379	5.56623e-13	3	Glyma.05G046000
2.29554e-17	0.335076	0.25	0.086	6.28152e-13	3	Glyma.10G136300
4.92121e-17	0.444859	0.351	0.16	1.34664e-12	3	Glyma.10G002600
5.24298e-17	-0.548639	0.079	0.316	1.43469e-12	3	Glyma.18G129200
5.62211e-17	0.470149	0.44	0.245	1.53844e-12	3	Glyma.13G302900
5.85537e-17	-0.631498	0.184	0.42	1.60226e-12	3	Glyma.14G109700
6.19901e-17	0.475688	0.411	0.215	1.6963e-12	3	Glyma.02G198400
6.34476e-17	0.438548	0.551	0.391	1.73618e-12	3	Glyma.06G150300
6.51334e-17	0.337134	0.228	0.075	1.78231e-12	3	Glyma.12G223400
7.32389e-17	0.327618	0.215	0.069	2.00411e-12	3	Glyma.17G103100
7.69473e-17	0.372148	0.25	0.089	2.10559e-12	3	Glyma.05G001100
7.72216e-17	0.337133	0.218	0.071	2.11309e-12	3	Glyma.U031221
8.2167e-17	0.460996	0.497	0.311	2.24842e-12	3	Glyma.08G180000
8.31755e-17	0.458633	0.481	0.278	2.27601e-12	3	Glyma.07G047600
1.01786e-16	-0.553035	0.111	0.337	2.78526e-12	3	Glyma.15G046600
1.08778e-16	-0.548035	0.076	0.302	2.9766e-12	3	Glyma.10G221500
1.17146e-16	0.309849	0.222	0.072	3.20559e-12	3	Glyma.08G052800
1.24468e-16	-0.578647	0.047	0.265	3.40594e-12	3	Glyma.18G043600
1.42032e-16	0.456387	0.402	0.204	3.88656e-12	3	Glyma.03G219400
1.52896e-16	0.361321	0.259	0.095	4.18383e-12	3	Glyma.02G147300
1.61015e-16	0.382767	0.297	0.12	4.40601e-12	3	Glyma.15G208300
1.65471e-16	-0.517365	0.044	0.259	4.52793e-12	3	Glyma.14G016300
1.67475e-16	0.336013	0.699	0.573	4.58279e-12	3	Glyma.12G232100
1.85347e-16	0.459085	0.364	0.177	5.07183e-12	3	Glyma.06G067400
1.93104e-16	0.449165	0.304	0.129	5.28409e-12	3	Glyma.03G084500
2.24098e-16	0.459338	0.497	0.308	6.13221e-12	3	Glyma.02G249600
2.40892e-16	0.313743	0.225	0.075	6.59176e-12	3	Glyma.03G207500
2.4777e-16	0.456427	0.399	0.205	6.77999e-12	3	Glyma.08G175900
3.49367e-16	0.327468	0.218	0.073	9.56007e-12	3	Glyma.13G285600
3.49974e-16	0.427866	0.541	0.379	9.57668e-12	3	Glyma.11G111400
3.55102e-16	0.462656	0.478	0.287	9.71702e-12	3	Glyma.02G141700
5.14538e-16	0.322513	0.225	0.077	1.40798e-11	3	Glyma.10G117200
5.35731e-16	0.308663	0.212	0.069	1.46597e-11	3	Glyma.11G097200
5.65446e-16	-0.554227	0.066	0.287	1.54729e-11	3	Glyma.05G215900
6.75989e-16	-0.548391	0.066	0.285	1.84978e-11	3	Glyma.05G082200
6.82867e-16	0.452562	0.44	0.251	1.8686e-11	3	Glyma.08G165500
8.26388e-16	0.442754	0.535	0.371	2.26133e-11	3	Glyma.04G112800
8.60078e-16	0.438178	0.396	0.205	2.35352e-11	3	Glyma.05G055500
9.722e-16	-0.572393	0.171	0.398	2.66033e-11	3	Glyma.08G328800
1.02658e-15	0.45322	0.392	0.204	2.80913e-11	3	Glyma.04G066000
1.10665e-15	0.375116	0.266	0.104	3.02824e-11	3	Glyma.17G252600
1.10959e-15	0.349665	0.215	0.073	3.03628e-11	3	Glyma.01G029200
1.25718e-15	0.38558	0.282	0.115	3.44015e-11	3	Glyma.13G204800
1.47528e-15	0.352866	0.263	0.102	4.03697e-11	3	Glyma.20G175300
1.5442e-15	-0.548986	0.184	0.417	4.22555e-11	3	Glyma.17G226500
1.59297e-15	-0.529417	0.117	0.343	4.35901e-11	3	Glyma.17G128200
1.89505e-15	0.425946	0.373	0.187	5.18562e-11	3	Glyma.05G048000
2.06061e-15	-0.521006	0.073	0.286	5.63865e-11	3	Glyma.18G045200
2.19822e-15	0.440309	0.487	0.296	6.0152e-11	3	Glyma.01G180800
2.30157e-15	-0.526089	0.07	0.285	6.298e-11	3	Glyma.20G170000
2.49631e-15	0.376388	0.285	0.118	6.83091e-11	3	Glyma.05G066100
2.5182e-15	-0.634438	0.101	0.324	6.89081e-11	3	Glyma.03G053500
2.52743e-15	-0.502264	0.082	0.304	6.91607e-11	3	Glyma.12G155900
2.81419e-15	0.435782	0.377	0.19	7.70075e-11	3	Glyma.03G261500
2.9689e-15	0.421554	0.538	0.38	8.12409e-11	3	Glyma.04G055300
3.61115e-15	0.460234	0.44	0.262	9.88154e-11	3	Glyma.10G032200
3.81515e-15	0.378714	0.297	0.126	1.04398e-10	3	Glyma.11G245400
4.54638e-15	0.299809	0.741	0.612	1.24407e-10	3	Glyma.11G168010
4.85809e-15	0.281151	0.212	0.071	1.32937e-10	3	Glyma.05G016000
4.89031e-15	0.335175	0.623	0.519	1.33818e-10	3	Glyma.19G106800
5.3265e-15	-0.500004	0.063	0.274	1.45754e-10	3	Glyma.01G086201
5.65958e-15	0.395046	0.285	0.122	1.54869e-10	3	Glyma.16G040400
5.73126e-15	-0.518638	0.019	0.201	1.5683e-10	3	Glyma.09G027900
6.00647e-15	-0.579671	0.136	0.363	1.64361e-10	3	Glyma.09G248600
6.20869e-15	-0.469778	0.079	0.304	1.69895e-10	3	Glyma.06G173500
6.92761e-15	0.434453	0.456	0.267	1.89567e-10	3	Glyma.14G213500
7.14717e-15	-0.51165	0.032	0.219	1.95575e-10	3	Glyma.10G212300
7.45652e-15	-0.528115	0.085	0.292	2.0404e-10	3	Glyma.07G077700
7.60807e-15	0.274133	0.82	0.709	2.08187e-10	3	Glyma.13G012200
9.65931e-15	0.294968	0.228	0.081	2.64317e-10	3	Glyma.12G025400
1.11442e-14	0.314584	0.203	0.069	3.04949e-10	3	Glyma.07G219500
1.16637e-14	0.403155	0.285	0.125	3.19166e-10	3	Glyma.11G042200
1.21703e-14	0.323263	0.237	0.089	3.33028e-10	3	Glyma.06G309000
1.24688e-14	0.416352	0.535	0.367	3.41197e-10	3	Glyma.13G129400
1.28417e-14	-0.523579	0.082	0.288	3.51401e-10	3	Glyma.13G157300
1.29615e-14	-0.547335	0.051	0.245	3.54678e-10	3	Glyma.08G199500
1.70369e-14	-0.49303	0.038	0.224	4.66199e-10	3	Glyma.14G074700
1.73631e-14	0.445249	0.427	0.248	4.75124e-10	3	Glyma.10G042100
1.80372e-14	0.430755	0.392	0.209	4.93569e-10	3	Glyma.06G067000
1.87313e-14	0.426059	0.484	0.306	5.12565e-10	3	Glyma.13G028200
1.87587e-14	0.424979	0.497	0.321	5.13313e-10	3	Glyma.07G060700
1.90847e-14	0.321189	0.234	0.087	5.22233e-10	3	Glyma.20G206400
1.91556e-14	-0.617882	0.111	0.318	5.24175e-10	3	Glyma.18G195200
2.96283e-14	-0.58198	0.032	0.211	8.10749e-10	3	Glyma.16G091100
3.20576e-14	-0.516482	0.051	0.24	8.77223e-10	3	Glyma.15G160700
3.29582e-14	-0.434223	0.032	0.215	9.01869e-10	3	Glyma.06G181000
3.36876e-14	-0.533077	0.117	0.317	9.21827e-10	3	Glyma.18G281700
3.37528e-14	-0.503715	0.057	0.241	9.23613e-10	3	Glyma.18G149300
3.60035e-14	0.353224	0.285	0.122	9.852e-10	3	Glyma.19G227700
3.62908e-14	-0.489671	0.07	0.261	9.93061e-10	3	Glyma.08G186200
3.64179e-14	-0.496247	0.092	0.293	9.9654e-10	3	Glyma.08G237500
3.69955e-14	-0.468203	0.047	0.238	1.01234e-09	3	Glyma.04G117400
3.87544e-14	0.437881	0.465	0.294	1.06048e-09	3	Glyma.08G276350
4.21852e-14	0.42017	0.484	0.307	1.15435e-09	3	Glyma.15G102000
4.24775e-14	-0.493576	0.028	0.21	1.16235e-09	3	Glyma.12G204400
4.65482e-14	-0.425315	0.032	0.216	1.27374e-09	3	Glyma.15G192300
4.71054e-14	0.400424	0.326	0.156	1.28899e-09	3	Glyma.01G199700
4.84205e-14	0.310536	0.206	0.073	1.32498e-09	3	Glyma.20G132651
4.86385e-14	-0.474154	0.076	0.272	1.33094e-09	3	Glyma.02G034300
6.16194e-14	0.34513	0.266	0.11	1.68615e-09	3	Glyma.11G030400
6.19642e-14	-0.457742	0.06	0.252	1.69559e-09	3	Glyma.04G096300
7.0741e-14	0.301976	0.218	0.08	1.93576e-09	3	Glyma.15G080200
7.27736e-14	-0.454549	0.035	0.219	1.99138e-09	3	Glyma.20G066100
7.61297e-14	-0.49409	0.047	0.232	2.08321e-09	3	Glyma.06G261400
8.37151e-14	-0.436794	0.032	0.21	2.29078e-09	3	Glyma.18G099000
8.77376e-14	0.429056	0.418	0.239	2.40085e-09	3	Glyma.15G052400
8.86025e-14	0.40374	0.519	0.374	2.42452e-09	3	Glyma.18G241700
1.018e-13	-0.487341	0.073	0.269	2.78566e-09	3	Glyma.06G261500
1.06907e-13	-0.491468	0.063	0.263	2.92539e-09	3	Glyma.16G178000
1.17256e-13	-0.484574	0.047	0.226	3.2086e-09	3	Glyma.10G271200
1.21415e-13	0.399409	0.525	0.371	3.3224e-09	3	Glyma.04G167900
1.33335e-13	0.297093	0.68	0.571	3.64857e-09	3	Glyma.15G248550
1.35127e-13	-0.604484	0.117	0.318	3.69762e-09	3	Glyma.06G137000
1.45283e-13	0.320317	0.231	0.09	3.97552e-09	3	Glyma.03G063200
1.52088e-13	0.390583	0.528	0.365	4.16173e-09	3	Glyma.13G210800
1.60426e-13	-0.615611	0.054	0.236	4.38991e-09	3	Glyma.15G101800
1.66975e-13	0.364887	0.285	0.127	4.56911e-09	3	Glyma.02G000900
1.86265e-13	0.344127	0.237	0.095	5.09695e-09	3	Glyma.17G185600
1.89811e-13	0.426115	0.421	0.25	5.19398e-09	3	Glyma.09G087700
1.93797e-13	0.316375	0.263	0.108	5.30306e-09	3	Glyma.18G193600
2.03918e-13	-0.490795	0.089	0.283	5.58e-09	3	Glyma.04G012700
2.07059e-13	-0.522283	0.101	0.295	5.66596e-09	3	Glyma.07G004300
2.46745e-13	-0.495612	0.044	0.224	6.75194e-09	3	Glyma.09G130400
2.56491e-13	-0.451309	0.044	0.221	7.01863e-09	3	Glyma.18G223300
2.63797e-13	0.404854	0.427	0.247	7.21854e-09	3	Glyma.17G012000
2.72728e-13	0.412525	0.446	0.279	7.46294e-09	3	Glyma.08G175800
3.33811e-13	0.340467	0.272	0.118	9.1344e-09	3	Glyma.18G015200
3.6019e-13	0.386887	0.535	0.376	9.85624e-09	3	Glyma.16G143600
3.86611e-13	0.376124	0.538	0.385	1.05792e-08	3	Glyma.03G094400
3.87915e-13	0.360701	0.285	0.129	1.06149e-08	3	Glyma.20G027200
4.30547e-13	-0.459816	0.079	0.269	1.17815e-08	3	Glyma.07G091800
5.28192e-13	0.370862	0.247	0.105	1.44534e-08	3	Glyma.10G098500
5.64504e-13	0.305465	0.215	0.082	1.54471e-08	3	Glyma.02G087800
6.78217e-13	0.315729	0.209	0.08	1.85587e-08	3	Glyma.19G000200
6.96791e-13	-0.481393	0.108	0.296	1.9067e-08	3	Glyma.17G230900
7.99519e-13	0.396422	0.389	0.214	2.1878e-08	3	Glyma.04G015900
8.9041e-13	0.285426	0.218	0.084	2.43652e-08	3	Glyma.16G189100
9.48274e-13	0.391379	0.506	0.348	2.59486e-08	3	Glyma.07G038500
1.00414e-12	-0.492854	0.079	0.272	2.74773e-08	3	Glyma.16G136600
1.02929e-12	0.313289	0.215	0.084	2.81655e-08	3	Glyma.11G226800
1.03616e-12	-0.482346	0.073	0.258	2.83535e-08	3	Glyma.07G065600
1.0439e-12	0.385423	0.269	0.124	2.85652e-08	3	Glyma.13G357200
1.14806e-12	-0.456376	0.101	0.296	3.14154e-08	3	Glyma.03G083100
1.18335e-12	0.398343	0.367	0.2	3.23811e-08	3	Glyma.11G195900
1.2125e-12	0.363278	0.579	0.433	3.31788e-08	3	Glyma.18G078500
1.30396e-12	0.28163	0.215	0.083	3.56815e-08	3	Glyma.05G139800
1.40105e-12	0.332229	0.288	0.132	3.83383e-08	3	Glyma.07G142700
1.473e-12	0.33287	0.247	0.105	4.03072e-08	3	Glyma.15G087200
1.57907e-12	0.380109	0.516	0.35	4.32097e-08	3	Glyma.19G139300
1.628e-12	0.385511	0.392	0.214	4.45485e-08	3	Glyma.05G026200
1.96527e-12	0.310985	0.203	0.078	5.37775e-08	3	Glyma.08G205500
1.96527e-12	0.274446	0.206	0.078	5.37775e-08	3	Glyma.12G052500
2.11142e-12	-0.43369	0.041	0.203	5.7777e-08	3	Glyma.04G122400
2.2599e-12	0.40708	0.44	0.281	6.18398e-08	3	Glyma.20G144700
2.51481e-12	0.340756	0.589	0.447	6.88152e-08	3	Glyma.02G064700
2.57974e-12	0.274606	0.693	0.586	7.05921e-08	3	Glyma.12G232200
2.59984e-12	-0.437936	0.073	0.257	7.1142e-08	3	Glyma.20G244900
2.71985e-12	0.276047	0.206	0.078	7.44259e-08	3	Glyma.03G259400
2.72663e-12	-0.454319	0.057	0.228	7.46114e-08	3	Glyma.12G236500
2.75996e-12	-0.436552	0.098	0.286	7.55236e-08	3	Glyma.16G101500
2.76575e-12	-0.415534	0.351	0.542	7.56819e-08	3	Glyma.06G295700
2.81628e-12	0.39199	0.478	0.315	7.70646e-08	3	Glyma.11G061300
2.86233e-12	-0.407817	0.041	0.205	7.83247e-08	3	Glyma.08G360000
2.98902e-12	0.289231	0.671	0.56	8.17915e-08	3	Glyma.19G007700
3.085e-12	-0.404912	0.057	0.232	8.44178e-08	3	Glyma.06G180700
3.14261e-12	-0.42487	0.073	0.252	8.59943e-08	3	Glyma.11G256800
3.50153e-12	0.38963	0.478	0.32	9.58158e-08	3	Glyma.04G215800
3.87485e-12	0.305215	0.228	0.094	1.06031e-07	3	Glyma.10G017900
3.97431e-12	0.318716	0.259	0.115	1.08753e-07	3	Glyma.03G110100
4.11844e-12	0.375294	0.522	0.368	1.12697e-07	3	Glyma.13G245200
4.13161e-12	0.272524	0.206	0.079	1.13057e-07	3	Glyma.10G263000
4.19847e-12	0.327788	0.266	0.119	1.14887e-07	3	Glyma.17G037900
4.50065e-12	-0.414217	0.051	0.221	1.23156e-07	3	Glyma.02G296600
4.53509e-12	0.358339	0.247	0.111	1.24098e-07	3	Glyma.09G044200
5.39171e-12	0.368981	0.519	0.361	1.47539e-07	3	Glyma.03G060300
5.48282e-12	-0.439979	0.06	0.225	1.50032e-07	3	Glyma.10G091000
5.66357e-12	0.270045	0.206	0.079	1.54978e-07	3	Glyma.09G255500
5.67459e-12	0.287194	0.218	0.088	1.5528e-07	3	Glyma.14G187800
7.50107e-12	0.376056	0.418	0.247	2.05259e-07	3	Glyma.17G228800
7.69753e-12	0.326248	0.241	0.105	2.10635e-07	3	Glyma.13G145200
8.02566e-12	-0.414721	0.047	0.21	2.19614e-07	3	Glyma.20G071200
8.99428e-12	0.33094	0.25	0.112	2.46119e-07	3	Glyma.07G049000
1.02675e-11	0.350485	0.307	0.154	2.80959e-07	3	Glyma.17G101700
1.06216e-11	-0.44641	0.222	0.421	2.9065e-07	3	Glyma.10G055300
1.13127e-11	0.383768	0.443	0.274	3.09561e-07	3	Glyma.06G194900
1.14549e-11	-0.424849	0.07	0.237	3.13453e-07	3	Glyma.02G216800
1.39892e-11	0.379552	0.427	0.259	3.82801e-07	3	Glyma.18G116900
1.41595e-11	-0.435678	0.278	0.515	3.87461e-07	3	Glyma.20G247850
1.49253e-11	0.351975	0.294	0.146	4.08415e-07	3	Glyma.04G002300
1.56643e-11	-0.484492	0.06	0.224	4.28638e-07	3	Glyma.15G160300
1.56949e-11	0.376375	0.465	0.304	4.29476e-07	3	Glyma.01G201600
1.71816e-11	0.292946	0.231	0.098	4.70158e-07	3	Glyma.18G015300
1.72827e-11	-0.466209	0.079	0.248	4.72924e-07	3	Glyma.13G330400
1.84023e-11	-0.45923	0.047	0.21	5.0356e-07	3	Glyma.15G021400
2.14106e-11	-0.495242	0.051	0.211	5.8588e-07	3	Glyma.16G135200
2.42192e-11	0.373575	0.354	0.198	6.62733e-07	3	Glyma.05G114900
2.63983e-11	-0.413457	0.079	0.248	7.22363e-07	3	Glyma.01G000900
2.693e-11	0.264604	0.209	0.084	7.36913e-07	3	Glyma.19G154700
2.82238e-11	-0.410853	0.063	0.226	7.72316e-07	3	Glyma.13G174600
3.0921e-11	-0.404352	0.089	0.261	8.46123e-07	3	Glyma.14G155900
3.46784e-11	0.362775	0.415	0.244	9.48939e-07	3	Glyma.15G250800
4.73925e-11	-0.393048	0.063	0.224	1.29685e-06	3	Glyma.15G265300
4.99231e-11	0.304335	0.275	0.13	1.3661e-06	3	Glyma.20G107800
5.13611e-11	0.26626	0.215	0.09	1.40544e-06	3	Glyma.08G286800
5.20812e-11	-0.3966	0.047	0.205	1.42515e-06	3	Glyma.09G131100
6.018e-11	0.258927	0.203	0.081	1.64676e-06	3	Glyma.13G113200
6.85519e-11	0.260282	0.206	0.084	1.87586e-06	3	Glyma.01G231900
7.23332e-11	-0.403993	0.066	0.226	1.97933e-06	3	Glyma.13G072500
7.43892e-11	0.323651	0.278	0.136	2.03559e-06	3	Glyma.15G250500
8.21444e-11	-0.357229	0.054	0.212	2.2478e-06	3	Glyma.08G266300
8.40873e-11	-0.397276	0.054	0.203	2.30097e-06	3	Glyma.11G175700
9.19137e-11	-0.41757	0.047	0.201	2.51513e-06	3	Glyma.16G177900
9.52539e-11	0.34437	0.516	0.39	2.60653e-06	3	Glyma.09G178600
9.63463e-11	-0.437482	0.054	0.206	2.63642e-06	3	Glyma.06G264900
9.98467e-11	-0.450735	0.161	0.34	2.73221e-06	3	Glyma.10G271600
1.02841e-10	0.342585	0.506	0.381	2.81413e-06	3	Glyma.04G008300
1.09568e-10	0.341578	0.519	0.354	2.99823e-06	3	Glyma.12G139200
1.25402e-10	-0.485633	0.057	0.209	3.43151e-06	3	Glyma.02G001500
1.45822e-10	-0.409111	0.12	0.3	3.99028e-06	3	Glyma.09G274000
1.48103e-10	-0.37472	0.057	0.207	4.0527e-06	3	Glyma.04G257200
1.49588e-10	-0.416108	0.07	0.229	4.09333e-06	3	Glyma.14G026300
1.50641e-10	0.348666	0.405	0.243	4.12214e-06	3	Glyma.16G127300
1.53413e-10	-0.409982	0.054	0.206	4.19799e-06	3	Glyma.11G117600
1.56864e-10	-0.365226	0.051	0.2	4.29244e-06	3	Glyma.15G219200
1.80766e-10	-0.385146	0.07	0.226	4.94649e-06	3	Glyma.01G031400
2.01611e-10	0.28416	0.25	0.116	5.51689e-06	3	Glyma.18G138300
2.40822e-10	-0.466503	0.098	0.263	6.58984e-06	3	Glyma.17G069100
2.4784e-10	-0.370074	0.066	0.219	6.7819e-06	3	Glyma.10G048100
2.62239e-10	-0.393738	0.085	0.245	7.1759e-06	3	Glyma.07G136500
2.75117e-10	-0.425886	0.127	0.303	7.52831e-06	3	Glyma.02G158200
2.8507e-10	0.304935	0.301	0.154	7.80065e-06	3	Glyma.07G185400
2.89199e-10	-0.372584	0.073	0.23	7.91365e-06	3	Glyma.05G090500
2.93687e-10	0.273541	0.222	0.098	8.03644e-06	3	Glyma.05G043200
3.04348e-10	0.262755	0.209	0.089	8.32818e-06	3	Glyma.13G137100
3.07578e-10	-0.382543	0.07	0.227	8.41655e-06	3	Glyma.16G109200
3.175e-10	0.275411	0.244	0.112	8.68807e-06	3	Glyma.02G113800
3.26502e-10	0.354122	0.332	0.188	8.93441e-06	3	Glyma.12G078100
4.07127e-10	0.2984	0.269	0.132	1.11406e-05	3	Glyma.09G227200
4.09166e-10	0.277959	0.237	0.11	1.11964e-05	3	Glyma.03G056700
4.09965e-10	-0.386183	0.06	0.209	1.12183e-05	3	Glyma.14G129100
4.57234e-10	-0.414862	0.193	0.366	1.25118e-05	3	Glyma.02G260800
4.65431e-10	0.335699	0.478	0.324	1.27361e-05	3	Glyma.01G026700
4.75729e-10	-0.38456	0.12	0.289	1.30178e-05	3	Glyma.04G123500
4.9208e-10	-0.403184	0.136	0.314	1.34653e-05	3	Glyma.17G188300
5.04656e-10	0.303902	0.244	0.116	1.38094e-05	3	Glyma.13G127200
5.54049e-10	0.276569	0.25	0.118	1.5161e-05	3	Glyma.05G201300
5.59338e-10	-0.417924	0.076	0.224	1.53057e-05	3	Glyma.10G107700
5.90472e-10	0.361787	0.335	0.191	1.61577e-05	3	Glyma.03G159100
6.27972e-10	0.326712	0.316	0.172	1.71838e-05	3	Glyma.17G137600
6.49755e-10	0.316089	0.288	0.149	1.77799e-05	3	Glyma.13G232500
6.63082e-10	0.360911	0.396	0.253	1.81446e-05	3	Glyma.13G129500
7.60769e-10	0.352193	0.405	0.259	2.08177e-05	3	Glyma.10G078400
8.33641e-10	0.243567	0.212	0.092	2.28117e-05	3	Glyma.01G095232
8.38528e-10	0.256565	0.212	0.093	2.29455e-05	3	Glyma.19G259800
8.69739e-10	0.295189	0.601	0.477	2.37995e-05	3	Glyma.13G068600
8.8902e-10	-0.386544	0.114	0.291	2.43271e-05	3	Glyma.17G187600
1.09354e-09	-0.372289	0.092	0.252	2.99237e-05	3	Glyma.09G054200
1.15334e-09	-0.400119	0.06	0.202	3.156e-05	3	Glyma.17G250800
1.31539e-09	-0.372761	0.089	0.239	3.59943e-05	3	Glyma.14G139800
1.46272e-09	-0.37337	0.089	0.24	4.00258e-05	3	Glyma.08G233702
1.70797e-09	0.333839	0.415	0.269	4.67369e-05	3	Glyma.08G302600
1.80753e-09	0.288958	0.247	0.122	4.94614e-05	3	Glyma.17G071200
1.82201e-09	-0.360635	0.092	0.241	4.98575e-05	3	Glyma.01G074000
1.83262e-09	-0.380954	0.076	0.221	5.01477e-05	3	Glyma.06G265100
1.85452e-09	0.296928	0.294	0.155	5.07471e-05	3	Glyma.19G260600
1.90789e-09	0.335538	0.472	0.336	5.22076e-05	3	Glyma.09G210900
1.93501e-09	-0.389509	0.168	0.353	5.29496e-05	3	Glyma.02G268000
2.22814e-09	0.340903	0.37	0.23	6.09708e-05	3	Glyma.06G015900
3.11832e-09	0.275227	0.228	0.109	8.53297e-05	3	Glyma.16G017600
3.20102e-09	0.286998	0.259	0.13	8.75926e-05	3	Glyma.13G336200
4.05276e-09	-0.342136	0.066	0.207	0.0001109	3	Glyma.05G131500
4.41566e-09	-0.402658	0.101	0.259	0.00012083	3	Glyma.18G244100
4.4879e-09	-0.378383	0.092	0.234	0.000122807	3	Glyma.04G141400
4.65347e-09	0.313014	0.32	0.18	0.000127338	3	Glyma.14G010900
4.70586e-09	0.266204	0.215	0.101	0.000128771	3	Glyma.10G223450
4.97331e-09	0.329322	0.361	0.215	0.00013609	3	Glyma.17G212200
5.51119e-09	-0.34961	0.12	0.281	0.000150808	3	Glyma.07G233100
5.68188e-09	-0.403624	0.18	0.353	0.000155479	3	Glyma.01G132500
5.68924e-09	0.292946	0.301	0.163	0.00015568	3	Glyma.10G281400
5.79121e-09	0.316161	0.275	0.149	0.000158471	3	Glyma.19G120800
5.92981e-09	-0.356094	0.101	0.247	0.000162263	3	Glyma.20G114300
6.09127e-09	-0.337706	0.07	0.207	0.000166682	3	Glyma.19G068800
6.09306e-09	-0.349315	0.085	0.23	0.00016673	3	Glyma.15G212800
6.16142e-09	0.250031	0.212	0.099	0.000168601	3	Glyma.20G249300
6.28025e-09	-0.365351	0.089	0.231	0.000171853	3	Glyma.20G054600
6.31169e-09	0.321573	0.497	0.345	0.000172713	3	Glyma.16G145800
6.55599e-09	-0.374619	0.101	0.245	0.000179398	3	Glyma.09G260600
7.43529e-09	0.323895	0.358	0.218	0.000203459	3	Glyma.04G053700
7.9077e-09	-0.32907	0.063	0.2	0.000216386	3	Glyma.09G267100
9.15805e-09	-0.333957	0.063	0.201	0.000250601	3	Glyma.17G215200
9.20446e-09	-0.366979	0.101	0.243	0.000251871	3	Glyma.20G171400
9.38818e-09	0.294865	0.316	0.177	0.000256898	3	Glyma.20G082800
1.26795e-08	0.311349	0.32	0.184	0.000346961	3	Glyma.12G166200
1.31206e-08	0.264443	0.253	0.129	0.000359031	3	Glyma.17G034900
1.3891e-08	0.279988	0.291	0.157	0.000380114	3	Glyma.14G061100
1.57318e-08	0.226571	0.218	0.104	0.000430484	3	Glyma.02G203300
1.58631e-08	-0.40349	0.117	0.256	0.000434079	3	Glyma.17G073200
1.98798e-08	-0.382877	0.111	0.249	0.000543991	3	Glyma.06G089800
2.42693e-08	-0.369058	0.152	0.303	0.000664105	3	Glyma.13G142400
2.67867e-08	-0.363892	0.085	0.214	0.000732992	3	Glyma.03G141200
2.75312e-08	0.22672	0.206	0.096	0.000753364	3	Glyma.19G190900
3.65861e-08	0.229294	0.212	0.101	0.00100114	3	Glyma.11G241702
3.772e-08	0.279648	0.278	0.155	0.00103217	3	Glyma.04G191700
4.62164e-08	0.277961	0.301	0.172	0.00126467	3	Glyma.06G017900
5.34093e-08	-0.336867	0.079	0.202	0.00146149	3	Glyma.13G235300
5.84523e-08	0.238996	0.259	0.136	0.00159949	3	Glyma.10G157100
5.91056e-08	-0.327744	0.076	0.211	0.00161737	3	Glyma.11G096700
5.98356e-08	0.309629	0.367	0.231	0.00163734	3	Glyma.13G357300
6.29082e-08	0.248349	0.25	0.131	0.00172142	3	Glyma.17G037700
6.29581e-08	0.228764	0.234	0.118	0.00172279	3	Glyma.11G098700
6.42259e-08	-0.297671	0.073	0.202	0.00175748	3	Glyma.07G070700
6.59308e-08	0.213386	0.203	0.096	0.00180413	3	Glyma.04G139200
7.00695e-08	-0.324537	0.079	0.21	0.00191738	3	Glyma.07G104200
7.20358e-08	0.255647	0.259	0.14	0.00197119	3	Glyma.16G026200
7.29188e-08	-0.347611	0.108	0.244	0.00199535	3	Glyma.02G001700
8.01427e-08	-0.341887	0.104	0.231	0.00219302	3	Glyma.18G146600
8.66126e-08	0.231835	0.218	0.109	0.00237007	3	Glyma.16G095100
9.77335e-08	-0.3336	0.079	0.2	0.00267438	3	Glyma.16G012300
1.04034e-07	-0.316664	0.104	0.236	0.00284679	3	Glyma.04G220200
1.20154e-07	0.299728	0.354	0.228	0.00328789	3	Glyma.20G243500
1.23856e-07	0.283164	0.516	0.399	0.00338918	3	Glyma.19G051900
1.33511e-07	0.25105	0.228	0.119	0.00365339	3	Glyma.06G019400
1.37842e-07	-0.309379	0.101	0.234	0.00377192	3	Glyma.16G103500
1.70529e-07	-0.315348	0.101	0.243	0.00466635	3	Glyma.08G339400
1.76649e-07	0.300916	0.285	0.171	0.00483382	3	Glyma.19G052400
1.82877e-07	0.283119	0.383	0.249	0.00500426	3	Glyma.18G150000
1.86098e-07	-0.370134	0.203	0.332	0.00509237	3	Glyma.01G006000
1.94924e-07	0.294973	0.396	0.269	0.00533391	3	Glyma.10G293500
2.0854e-07	-0.375842	0.142	0.27	0.0057065	3	Glyma.08G142000
2.09548e-07	-0.329931	0.101	0.224	0.00573406	3	Glyma.02G022000
2.18985e-07	-0.328128	0.108	0.238	0.0059923	3	Glyma.01G019800
2.20603e-07	0.29112	0.37	0.24	0.00603658	3	Glyma.08G304200
2.21356e-07	-0.281943	0.076	0.2	0.00605718	3	Glyma.11G165710
2.27134e-07	-0.394958	0.136	0.255	0.00621528	3	Glyma.11G160484
2.32222e-07	0.285782	0.329	0.201	0.00635452	3	Glyma.12G232700
2.3772e-07	0.233369	0.222	0.113	0.00650498	3	Glyma.11G037500
2.5464e-07	-0.340365	0.259	0.44	0.00696797	3	Glyma.04G229900
2.7345e-07	0.299453	0.418	0.301	0.0074827	3	Glyma.18G030400
2.77181e-07	-0.305765	0.085	0.205	0.00758479	3	Glyma.13G000800
2.82242e-07	-0.351396	0.133	0.274	0.00772327	3	Glyma.15G026500
3.3401e-07	0.249912	0.297	0.173	0.00913985	3	Glyma.18G244900
3.5867e-07	0.283563	0.465	0.359	0.00981465	3	Glyma.13G282000
3.68059e-07	0.264871	0.291	0.17	0.0100716	3	Glyma.19G181300
3.91484e-07	0.228525	0.247	0.134	0.0107126	3	Glyma.11G246700
4.05559e-07	-0.341597	0.184	0.328	0.0110977	3	Glyma.15G238600
4.61112e-07	0.234162	0.253	0.139	0.0126179	3	Glyma.07G057200
5.19312e-07	-0.289501	0.085	0.207	0.0142104	3	Glyma.11G208700
6.18857e-07	0.273401	0.478	0.366	0.0169344	3	Glyma.08G274400
6.72145e-07	0.278867	0.468	0.349	0.0183926	3	Glyma.16G007700
7.32041e-07	0.250884	0.557	0.447	0.0200316	3	Glyma.15G248500
8.66878e-07	0.272026	0.43	0.307	0.0237212	3	Glyma.10G174800
1.11676e-06	-0.282963	0.117	0.249	0.0305589	3	Glyma.11G039900
1.25738e-06	0.219771	0.237	0.131	0.0344071	3	Glyma.05G025300
1.28233e-06	0.201618	0.218	0.116	0.0350897	3	Glyma.08G086600
1.30019e-06	-0.271392	0.098	0.219	0.0355785	3	Glyma.04G096100
1.33293e-06	-0.289651	0.089	0.2	0.0364744	3	Glyma.18G224500
1.4576e-06	-0.325704	0.165	0.287	0.0398858	3	Glyma.08G279800
1.78926e-06	0.279603	0.377	0.266	0.0489613	3	Glyma.02G282500
1.81167e-06	-0.284672	0.13	0.265	0.0495745	3	Glyma.17G239000
1.92007e-06	-0.288438	0.098	0.207	0.0525408	3	Glyma.01G051400
1.97428e-06	-0.309647	0.142	0.257	0.0540241	3	Glyma.08G008100
2.0759e-06	0.272339	0.38	0.257	0.0568049	3	Glyma.16G089000
2.12816e-06	-0.329091	0.168	0.292	0.0582349	3	Glyma.09G078700
2.17653e-06	-0.324624	0.123	0.235	0.0595584	3	Glyma.18G226500
2.78514e-06	0.282512	0.297	0.192	0.0762125	3	Glyma.05G011200
2.93792e-06	-0.2748	0.117	0.247	0.0803932	3	Glyma.05G204600
3.31148e-06	0.255644	0.449	0.332	0.0906152	3	Glyma.16G016100
3.4755e-06	0.264742	0.351	0.239	0.0951035	3	Glyma.01G145400
3.47903e-06	-0.296731	0.149	0.267	0.0952001	3	Glyma.19G193800
4.4347e-06	-0.291982	0.117	0.227	0.121351	3	Glyma.05G089200
4.93023e-06	0.261956	0.408	0.294	0.134911	3	Glyma.12G219300
6.65057e-06	-0.282507	0.114	0.219	0.181986	3	Glyma.14G106500
6.69959e-06	-0.308063	0.339	0.443	0.183328	3	Glyma.18G226850
7.9117e-06	-0.29732	0.161	0.275	0.216496	3	Glyma.16G096600
8.18559e-06	-0.280042	0.108	0.219	0.22399	3	Glyma.19G114700
1.04596e-05	-0.272646	0.104	0.208	0.286218	3	Glyma.07G000500
1.07497e-05	-0.301254	0.196	0.302	0.294156	3	Glyma.13G255900
1.17277e-05	-0.248256	0.101	0.206	0.320916	3	Glyma.18G216100
1.3291e-05	-0.262384	0.123	0.242	0.363696	3	Glyma.08G339500
1.33999e-05	-0.262514	0.111	0.218	0.366676	3	Glyma.18G014900
1.347e-05	0.245384	0.367	0.255	0.368593	3	Glyma.08G050600
1.51665e-05	0.260765	0.399	0.296	0.415015	3	Glyma.02G221400
1.51709e-05	-0.300527	0.231	0.334	0.415136	3	Glyma.07G048500
1.95815e-05	0.234484	0.367	0.256	0.535827	3	Glyma.20G196900
4.49052e-05	0.229779	0.386	0.286	1	3	Glyma.02G038100
4.59631e-05	-0.253927	0.275	0.388	1	3	Glyma.12G043000
5.52468e-05	-0.223591	0.421	0.553	1	3	Glyma.20G141600
0.000490799	-0.218179	0.218	0.318	1	3	Glyma.05G236300
1.29302e-90	1.09796	0.624	0.13	3.53821e-86	4	Glyma.01G030500
1.66097e-75	0.941703	0.843	0.362	4.54508e-71	4	Glyma.04G156200
4.59231e-71	0.925541	0.824	0.332	1.25664e-66	4	Glyma.07G091400
1.14806e-67	0.943527	0.635	0.175	3.14154e-63	4	Glyma.16G095000
3.17013e-67	0.95419	0.643	0.18	8.67475e-63	4	Glyma.11G160484
2.74155e-65	0.823512	0.875	0.443	7.50198e-61	4	Glyma.06G223500
4.63085e-61	0.838856	0.855	0.434	1.26718e-56	4	Glyma.08G264900
2.8337e-60	0.868034	0.573	0.152	7.75414e-56	4	Glyma.02G035000
4.45301e-60	0.883746	0.71	0.264	1.21852e-55	4	Glyma.07G048500
1.28106e-53	0.822438	0.816	0.373	3.5055e-49	4	Glyma.18G226850
8.88373e-53	0.597573	0.278	0.032	2.43094e-48	4	Glyma.18G228700
1.82572e-51	0.864856	0.616	0.211	4.99591e-47	4	Glyma.17G150100
2.6431e-51	0.782284	0.776	0.367	7.23258e-47	4	Glyma.16G017400
9.89835e-50	0.826822	0.624	0.224	2.70858e-45	4	Glyma.16G189500
1.45232e-49	0.816165	0.686	0.261	3.97414e-45	4	Glyma.10G271600
9.45757e-49	0.76325	0.518	0.146	2.58797e-44	4	Glyma.01G182700
2.57118e-48	0.692504	0.4	0.085	7.03579e-44	4	Glyma.11G173700
3.55537e-47	0.80527	0.671	0.262	9.7289e-43	4	Glyma.01G006000
1.64895e-46	0.774176	0.624	0.227	4.51217e-42	4	Glyma.08G214000
3.09838e-46	0.833271	0.694	0.284	8.4784e-42	4	Glyma.05G068000
4.48708e-45	0.714734	0.373	0.079	1.22784e-40	4	Glyma.02G059500
8.63815e-45	0.771567	0.686	0.267	2.36374e-40	4	Glyma.18G057900
3.06445e-44	0.687674	0.431	0.108	8.38555e-40	4	Glyma.20G166400
4.03761e-44	0.710212	0.51	0.148	1.10485e-39	4	Glyma.07G000500
1.26198e-43	0.7581	0.553	0.188	3.45329e-39	4	Glyma.04G161600
1.14849e-42	0.657623	0.396	0.094	3.14273e-38	4	Glyma.06G033700
1.81809e-42	0.574703	0.298	0.052	4.97503e-38	4	Glyma.02G143300
1.16124e-41	0.754774	0.631	0.258	3.17763e-37	4	Glyma.03G261800
7.78958e-40	0.600794	0.302	0.057	2.13154e-35	4	Glyma.08G285400
1.16376e-39	0.730287	0.58	0.22	3.1845e-35	4	Glyma.19G260900
4.17028e-39	0.594096	0.337	0.075	1.14116e-34	4	Glyma.01G034700
8.16255e-39	0.644809	0.482	0.146	2.2336e-34	4	Glyma.19G262000
1.00774e-37	0.612441	0.349	0.082	2.75758e-33	4	Glyma.02G303000
2.16979e-37	0.623657	0.4	0.107	5.93741e-33	4	Glyma.12G054700
6.94632e-37	0.484718	0.224	0.032	1.90079e-32	4	Glyma.09G263400
1.28008e-36	0.538485	0.31	0.066	3.50281e-32	4	Glyma.05G218000
1.91315e-36	0.683859	0.498	0.172	5.23514e-32	4	Glyma.18G146600
3.05362e-36	0.651119	0.749	0.402	8.35593e-32	4	Glyma.19G130800
3.07537e-36	0.584798	0.369	0.092	8.41545e-32	4	Glyma.13G046700
5.42217e-36	0.684044	0.624	0.255	1.48372e-31	4	Glyma.02G019600
1.41158e-35	0.520591	0.29	0.058	3.86265e-31	4	Glyma.05G002000
1.92586e-34	0.528056	0.31	0.068	5.26994e-30	4	Glyma.15G127500
3.47906e-34	0.439501	0.224	0.035	9.5201e-30	4	Glyma.10G138700
4.94312e-34	0.616067	0.365	0.099	1.35264e-29	4	Glyma.15G161100
6.1203e-34	0.616717	0.769	0.421	1.67476e-29	4	Glyma.02G047600
7.6268e-34	0.539062	0.294	0.063	2.087e-29	4	Glyma.07G001400
7.85574e-34	0.601747	0.416	0.123	2.14965e-29	4	Glyma.09G184600
1.50678e-33	0.573811	0.396	0.113	4.12315e-29	4	Glyma.03G008400
1.64445e-33	0.667013	0.553	0.216	4.49987e-29	4	Glyma.16G096600
1.69194e-33	0.634692	0.541	0.199	4.62982e-29	4	Glyma.16G024600
6.80939e-33	0.559804	0.341	0.087	1.86332e-28	4	Glyma.14G149700
1.83278e-32	0.568109	0.863	0.544	5.01521e-28	4	Glyma.05G007100
2.68653e-32	0.613854	0.404	0.124	7.35141e-28	4	Glyma.17G059100
8.28307e-32	0.562285	0.871	0.536	2.26658e-27	4	Glyma.19G007700
1.16671e-31	0.625764	0.565	0.23	3.19259e-27	4	Glyma.15G003200
1.5036e-31	0.487151	0.227	0.04	4.11444e-27	4	Glyma.18G139900
1.90888e-31	0.544726	0.31	0.077	5.22345e-27	4	Glyma.18G067600
2.45997e-31	0.652324	0.584	0.242	6.73146e-27	4	Glyma.18G116900
1.04228e-30	0.569143	0.31	0.078	2.85208e-26	4	Glyma.14G029100
4.45027e-30	0.587086	0.51	0.192	1.21777e-25	4	Glyma.11G255300
5.07827e-30	0.603333	0.424	0.141	1.38962e-25	4	Glyma.10G075900
5.3214e-30	0.463607	0.278	0.063	1.45615e-25	4	Glyma.05G148700
7.40059e-30	0.645901	0.675	0.34	2.0251e-25	4	Glyma.17G226500
8.94399e-30	0.543295	0.361	0.105	2.44743e-25	4	Glyma.15G108000
1.15976e-29	0.628733	0.506	0.2	3.17357e-25	4	Glyma.07G055900
1.55052e-29	0.543733	0.373	0.112	4.24284e-25	4	Glyma.14G012900
1.85834e-29	0.592494	0.369	0.111	5.08515e-25	4	Glyma.07G156100
2.70355e-29	0.497801	0.271	0.062	7.398e-25	4	Glyma.13G003000
1.38614e-28	0.602343	0.502	0.199	3.79304e-24	4	Glyma.09G218800
1.70008e-28	0.612599	0.561	0.236	4.65211e-24	4	Glyma.16G089000
1.76671e-28	0.624696	0.541	0.23	4.83441e-24	4	Glyma.08G279800
3.96788e-28	0.440024	0.263	0.059	1.08577e-23	4	Glyma.06G081800
4.09276e-28	0.625707	0.412	0.14	1.11994e-23	4	Glyma.12G133700
7.08648e-28	0.626905	0.361	0.115	1.93914e-23	4	Glyma.01G025800
3.12084e-27	0.576496	0.58	0.251	8.53986e-23	4	Glyma.08G302600
4.22516e-27	0.509695	0.286	0.075	1.15617e-22	4	Glyma.03G253500
4.26761e-27	0.537992	0.435	0.154	1.16779e-22	4	Glyma.12G046200
6.86072e-27	0.579997	0.455	0.173	1.87737e-22	4	Glyma.13G169500
7.86826e-27	0.472103	0.345	0.102	2.15307e-22	4	Glyma.18G222100
8.80329e-27	0.502096	0.855	0.538	2.40893e-22	4	Glyma.07G112000
9.28547e-27	0.479964	0.898	0.604	2.54088e-22	4	Glyma.11G221000
1.67908e-26	0.488049	0.325	0.094	4.59465e-22	4	Glyma.08G064600
2.18892e-26	0.446267	0.247	0.056	5.98975e-22	4	Glyma.04G186300
2.53961e-26	0.5558	0.349	0.11	6.94938e-22	4	Glyma.12G014400
2.6582e-26	0.507869	0.318	0.093	7.2739e-22	4	Glyma.12G183100
8.64195e-26	0.576005	0.459	0.18	2.36478e-21	4	Glyma.01G038600
9.0393e-26	0.510167	0.341	0.106	2.47352e-21	4	Glyma.10G024200
1.74026e-25	0.561294	0.412	0.152	4.76205e-21	4	Glyma.04G033500
1.82761e-25	0.526865	0.373	0.124	5.00107e-21	4	Glyma.19G177700
2.29222e-25	0.394981	0.224	0.048	6.27242e-21	4	Glyma.02G149700
2.9394e-25	0.537273	0.341	0.106	8.04337e-21	4	Glyma.17G044500
7.94631e-25	0.440657	0.239	0.056	2.17443e-20	4	Glyma.10G225400
8.27422e-25	0.483151	0.31	0.09	2.26416e-20	4	Glyma.15G130500
9.80967e-25	0.535271	0.424	0.156	2.68432e-20	4	Glyma.19G181300
1.8954e-24	0.378431	0.2	0.039	5.18659e-20	4	Glyma.13G029900
2.57204e-24	0.528722	0.412	0.153	7.03813e-20	4	Glyma.05G166800
2.65879e-24	0.500714	0.286	0.082	7.27552e-20	4	Glyma.11G037100
2.70211e-24	0.393688	0.231	0.053	7.39404e-20	4	Glyma.20G102900
3.98171e-24	0.553856	0.576	0.273	1.08955e-19	4	Glyma.07G028800
4.7553e-24	0.584236	0.478	0.205	1.30124e-19	4	Glyma.01G214300
6.1668e-24	0.526891	0.459	0.184	1.68748e-19	4	Glyma.02G202500
8.51042e-24	0.461472	0.286	0.082	2.32879e-19	4	Glyma.18G037900
1.0119e-23	0.390554	0.224	0.052	2.76896e-19	4	Glyma.19G194900
1.16393e-23	0.439788	0.259	0.067	3.18497e-19	4	Glyma.17G108500
1.33962e-23	0.539183	0.392	0.148	3.66573e-19	4	Glyma.13G294300
1.58773e-23	0.518231	0.776	0.452	4.34467e-19	4	Glyma.03G114600
2.27257e-23	0.445193	0.286	0.083	6.21865e-19	4	Glyma.09G187800
2.54165e-23	0.410896	0.208	0.045	6.95498e-19	4	Glyma.03G070600
2.56847e-23	0.45095	0.294	0.087	7.02836e-19	4	Glyma.10G234500
4.55686e-23	0.568228	0.478	0.201	1.24694e-18	4	Glyma.17G073200
6.12611e-23	0.487154	0.337	0.113	1.67635e-18	4	Glyma.10G172100
6.4091e-23	0.537479	0.427	0.169	1.75379e-18	4	Glyma.14G010900
7.08572e-23	0.424357	0.29	0.085	1.93894e-18	4	Glyma.01G229200
1.4715e-22	0.449123	0.318	0.101	4.02662e-18	4	Glyma.15G156900
1.73171e-22	0.473814	0.325	0.106	4.73865e-18	4	Glyma.13G336800
1.74714e-22	0.532232	0.561	0.265	4.78089e-18	4	Glyma.02G038100
1.97745e-22	0.467132	0.318	0.104	5.41111e-18	4	Glyma.12G033700
2.11954e-22	0.535745	0.427	0.174	5.79991e-18	4	Glyma.08G063800
2.21092e-22	0.423407	0.239	0.062	6.04995e-18	4	Glyma.12G062700
2.24827e-22	0.450114	0.271	0.077	6.15217e-18	4	Glyma.03G122300
2.54211e-22	0.538156	0.376	0.143	6.95622e-18	4	Glyma.01G203100
2.70458e-22	0.399131	0.227	0.056	7.40082e-18	4	Glyma.16G036100
3.05395e-22	0.384029	0.247	0.065	8.35683e-18	4	Glyma.02G133600
3.46837e-22	0.530754	0.522	0.239	9.49084e-18	4	Glyma.17G012000
3.48029e-22	0.462963	0.867	0.588	9.52347e-18	4	Glyma.15G057600
4.15121e-22	0.5304	0.639	0.342	1.13594e-17	4	Glyma.14G094700
5.77494e-22	0.490579	0.263	0.075	1.58025e-17	4	Glyma.02G039000
6.85452e-22	0.425694	0.235	0.061	1.87567e-17	4	Glyma.07G258100
1.26247e-21	0.454344	0.322	0.106	3.45462e-17	4	Glyma.20G130366
1.39607e-21	0.537689	0.463	0.206	3.82021e-17	4	Glyma.08G226600
1.54872e-21	0.479177	0.306	0.099	4.23793e-17	4	Glyma.20G064100
1.66401e-21	0.516351	0.451	0.193	4.55341e-17	4	Glyma.09G167900
1.94384e-21	0.3875	0.235	0.061	5.31911e-17	4	Glyma.20G005900
2.36125e-21	0.449653	0.282	0.087	6.46131e-17	4	Glyma.15G100200
2.89227e-21	0.478856	0.239	0.066	7.91441e-17	4	Glyma.11G061100
3.15275e-21	0.482416	0.796	0.499	8.62718e-17	4	Glyma.19G106800
3.24644e-21	0.47846	0.314	0.105	8.88356e-17	4	Glyma.02G088200
3.7675e-21	0.442745	0.318	0.104	1.03094e-16	4	Glyma.18G226700
3.83812e-21	0.502531	0.431	0.18	1.05026e-16	4	Glyma.18G001800
5.42535e-21	0.430811	0.278	0.085	1.48459e-16	4	Glyma.04G206300
5.52185e-21	0.471945	0.369	0.138	1.511e-16	4	Glyma.02G026300
5.66267e-21	0.497516	0.761	0.447	1.54953e-16	4	Glyma.11G181100
7.15459e-21	0.520805	0.471	0.204	1.95778e-16	4	Glyma.06G067000
8.28068e-21	0.465477	0.333	0.119	2.26592e-16	4	Glyma.15G092400
9.92864e-21	0.496187	0.345	0.127	2.71687e-16	4	Glyma.20G118700
1.15939e-20	0.45175	0.345	0.125	3.17256e-16	4	Glyma.17G257400
1.20947e-20	0.51302	0.569	0.267	3.3096e-16	4	Glyma.08G175800
1.47237e-20	0.455198	0.306	0.101	4.02899e-16	4	Glyma.08G220000
2.20974e-20	0.479658	0.361	0.136	6.04674e-16	4	Glyma.02G283400
2.39756e-20	0.475986	0.384	0.155	6.56068e-16	4	Glyma.06G126000
2.58608e-20	0.502791	0.467	0.214	7.07654e-16	4	Glyma.12G064100
3.34878e-20	0.408946	0.255	0.075	9.1636e-16	4	Glyma.01G191600
3.77235e-20	0.390624	0.243	0.068	1.03227e-15	4	Glyma.07G158200
5.40922e-20	0.378071	0.224	0.06	1.48018e-15	4	Glyma.14G141800
5.52572e-20	0.435022	0.306	0.102	1.51206e-15	4	Glyma.17G187000
5.85285e-20	0.444644	0.306	0.103	1.60157e-15	4	Glyma.11G130200
6.78032e-20	0.462697	0.824	0.53	1.85537e-15	4	Glyma.18G036400
7.43357e-20	0.543921	0.349	0.134	2.03412e-15	4	Glyma.09G115100
1.01899e-19	0.352833	0.204	0.05	2.78836e-15	4	Glyma.10G284100
1.03331e-19	0.394816	0.243	0.07	2.82755e-15	4	Glyma.05G165100
1.59517e-19	0.418295	0.306	0.104	4.36502e-15	4	Glyma.02G101100
1.99468e-19	0.416906	0.29	0.096	5.45823e-15	4	Glyma.12G227800
2.19546e-19	0.392794	0.243	0.071	6.00765e-15	4	Glyma.11G121100
2.31255e-19	0.368018	0.208	0.054	6.32806e-15	4	Glyma.18G000300
2.3771e-19	0.402899	0.235	0.067	6.50469e-15	4	Glyma.02G209000
2.47223e-19	0.399629	0.278	0.09	6.76501e-15	4	Glyma.12G239100
3.24592e-19	0.436557	0.275	0.09	8.88215e-15	4	Glyma.19G194985
3.45152e-19	0.496546	0.314	0.116	9.44474e-15	4	Glyma.08G241200
4.05491e-19	0.498887	0.455	0.209	1.10959e-14	4	Glyma.04G158100
4.46698e-19	0.446912	0.29	0.1	1.22234e-14	4	Glyma.08G297100
5.16367e-19	0.375251	0.2	0.051	1.41299e-14	4	Glyma.08G334700
6.23157e-19	0.500338	0.471	0.216	1.70521e-14	4	Glyma.03G144500
7.37064e-19	0.447484	0.376	0.148	2.0169e-14	4	Glyma.19G260600
8.35027e-19	0.49596	0.557	0.3	2.28497e-14	4	Glyma.03G128300
9.34634e-19	0.441709	0.349	0.134	2.55753e-14	4	Glyma.18G292600
1.09135e-18	0.386281	0.255	0.079	2.98638e-14	4	Glyma.04G037100
1.09506e-18	0.391691	0.231	0.067	2.99653e-14	4	Glyma.09G063200
1.1064e-18	0.445142	0.361	0.142	3.02756e-14	4	Glyma.19G228100
1.12929e-18	0.395026	0.243	0.073	3.09018e-14	4	Glyma.08G017300
1.19904e-18	0.410752	0.282	0.094	3.28104e-14	4	Glyma.13G136300
1.22685e-18	0.492185	0.584	0.314	3.35716e-14	4	Glyma.01G026700
1.55952e-18	0.377427	0.255	0.079	4.26748e-14	4	Glyma.12G224600
1.6377e-18	0.371265	0.239	0.071	4.48141e-14	4	Glyma.14G066000
1.71134e-18	0.412175	0.322	0.116	4.68292e-14	4	Glyma.18G004100
2.96375e-18	0.445931	0.365	0.146	8.11001e-14	4	Glyma.06G204200
4.07087e-18	0.358794	0.231	0.067	1.11395e-13	4	Glyma.14G149800
4.12896e-18	0.407609	0.298	0.104	1.12985e-13	4	Glyma.18G060600
4.57174e-18	0.365636	0.251	0.078	1.25101e-13	4	Glyma.02G245300
7.78502e-18	0.436371	0.318	0.12	2.13029e-13	4	Glyma.08G236400
9.71241e-18	0.444096	0.365	0.15	2.6577e-13	4	Glyma.07G185400
1.02698e-17	0.422273	0.294	0.105	2.81024e-13	4	Glyma.17G211900
1.09983e-17	0.425509	0.353	0.138	3.00956e-13	4	Glyma.11G008300
1.17566e-17	0.414564	0.294	0.106	3.21708e-13	4	Glyma.01G231400
1.20395e-17	0.369762	0.251	0.079	3.29448e-13	4	Glyma.14G040200
1.35452e-17	0.477696	0.557	0.285	3.70652e-13	4	Glyma.18G030400
1.41353e-17	0.474016	0.624	0.341	3.868e-13	4	Glyma.19G139300
1.73522e-17	0.382523	0.224	0.067	4.74826e-13	4	Glyma.10G239200
3.1762e-17	0.480994	0.557	0.302	8.69137e-13	4	Glyma.01G089300
4.31671e-17	0.288705	0.898	0.75	1.18122e-12	4	Glyma.14G008000
4.48788e-17	0.454516	0.427	0.189	1.22806e-12	4	Glyma.18G226500
5.33317e-17	0.430336	0.341	0.138	1.45937e-12	4	Glyma.20G244500
5.63452e-17	0.422348	0.365	0.151	1.54183e-12	4	Glyma.01G234600
5.72889e-17	0.34081	0.224	0.067	1.56765e-12	4	Glyma.19G046600
6.39803e-17	0.391384	0.314	0.117	1.75076e-12	4	Glyma.09G096800
7.27558e-17	0.342266	0.235	0.072	1.99089e-12	4	Glyma.07G023000
7.61132e-17	0.357067	0.216	0.064	2.08276e-12	4	Glyma.03G195300
7.7143e-17	0.410619	0.255	0.087	2.11094e-12	4	Glyma.02G100000
1.15526e-16	0.496599	0.345	0.141	3.16125e-12	4	Glyma.12G233400
1.58383e-16	0.432295	0.373	0.157	4.334e-12	4	Glyma.14G110000
2.08607e-16	0.367575	0.263	0.091	5.70832e-12	4	Glyma.15G169200
2.25978e-16	0.363202	0.235	0.076	6.18367e-12	4	Glyma.04G088000
2.56819e-16	0.337719	0.212	0.062	7.02759e-12	4	Glyma.01G005400
4.34468e-16	0.4636	0.518	0.262	1.18888e-11	4	Glyma.04G065600
5.11817e-16	0.355775	0.216	0.067	1.40054e-11	4	Glyma.15G244250
5.42778e-16	0.374866	0.282	0.103	1.48526e-11	4	Glyma.18G144100
5.55599e-16	0.342165	0.2	0.059	1.52034e-11	4	Glyma.18G023200
7.03277e-16	0.407255	0.286	0.109	1.92445e-11	4	Glyma.09G286200
7.24224e-16	0.460452	0.612	0.339	1.98177e-11	4	Glyma.07G038500
7.51056e-16	0.379668	0.286	0.105	2.05519e-11	4	Glyma.19G116700
7.8552e-16	0.37996	0.251	0.087	2.1495e-11	4	Glyma.17G262400
7.91032e-16	0.44906	0.365	0.163	2.16458e-11	4	Glyma.09G066200
9.98658e-16	0.395437	0.267	0.098	2.73273e-11	4	Glyma.05G183100
1.06551e-15	0.353675	0.251	0.087	2.91567e-11	4	Glyma.14G160600
1.29644e-15	0.441716	0.62	0.35	3.54757e-11	4	Glyma.08G274400
1.3258e-15	0.349116	0.216	0.067	3.62793e-11	4	Glyma.13G316200
1.48532e-15	0.351243	0.259	0.092	4.06444e-11	4	Glyma.14G049700
1.59875e-15	0.429895	0.275	0.104	4.37482e-11	4	Glyma.11G082300
1.63085e-15	-0.692299	0.184	0.408	4.46267e-11	4	Glyma.16G071500
1.69833e-15	0.421599	0.749	0.48	4.6473e-11	4	Glyma.06G295700
2.13994e-15	0.429566	0.275	0.104	5.85573e-11	4	Glyma.12G044700
2.23064e-15	0.442961	0.643	0.355	6.10391e-11	4	Glyma.13G210800
3.20002e-15	0.351696	0.235	0.079	8.75653e-11	4	Glyma.07G262000
3.29888e-15	0.365166	0.302	0.118	9.02706e-11	4	Glyma.19G046800
3.75047e-15	0.390578	0.318	0.129	1.02628e-10	4	Glyma.02G165000
4.68977e-15	0.457094	0.565	0.323	1.28331e-10	4	Glyma.06G109200
5.33164e-15	0.31625	0.2	0.061	1.45895e-10	4	Glyma.03G170300
5.58823e-15	0.426128	0.471	0.231	1.52916e-10	4	Glyma.08G304200
5.9384e-15	0.340708	0.239	0.082	1.62498e-10	4	Glyma.03G181800
6.49608e-15	0.413751	0.376	0.174	1.77759e-10	4	Glyma.12G009600
7.29115e-15	0.425732	0.529	0.283	1.99515e-10	4	Glyma.02G061100
8.92528e-15	0.425018	0.333	0.144	2.44231e-10	4	Glyma.08G188000
9.54836e-15	0.363652	0.224	0.075	2.61281e-10	4	Glyma.19G155000
9.9041e-15	0.38728	0.318	0.131	2.71016e-10	4	Glyma.01G076900
1.21443e-14	0.335346	0.208	0.067	3.32318e-10	4	Glyma.17G114902
1.24339e-14	0.322849	0.208	0.067	3.40241e-10	4	Glyma.01G188100
1.25741e-14	0.346629	0.259	0.096	3.44079e-10	4	Glyma.15G203100
1.58257e-14	0.409971	0.349	0.154	4.33054e-10	4	Glyma.09G241100
1.67842e-14	0.401666	0.392	0.185	4.59284e-10	4	Glyma.06G145700
2.0029e-14	0.429243	0.475	0.242	5.48073e-10	4	Glyma.15G250800
2.29758e-14	0.416175	0.247	0.091	6.28711e-10	4	Glyma.04G236600
2.3923e-14	0.326518	0.227	0.078	6.54628e-10	4	Glyma.08G038200
2.85818e-14	0.398784	0.278	0.112	7.82113e-10	4	Glyma.15G052300
3.17612e-14	0.338274	0.224	0.078	8.69112e-10	4	Glyma.07G258500
3.55865e-14	0.357621	0.294	0.116	9.73789e-10	4	Glyma.05G201300
3.86979e-14	0.381627	0.318	0.136	1.05893e-09	4	Glyma.09G266200
4.49373e-14	0.33407	0.231	0.082	1.22966e-09	4	Glyma.08G124900
4.69947e-14	0.352027	0.243	0.089	1.28596e-09	4	Glyma.11G104100
4.94123e-14	0.391939	0.318	0.137	1.35212e-09	4	Glyma.16G158700
4.96724e-14	0.332441	0.212	0.071	1.35923e-09	4	Glyma.06G158200
5.51794e-14	0.361427	0.267	0.104	1.50993e-09	4	Glyma.07G184800
5.83342e-14	0.369756	0.263	0.101	1.59626e-09	4	Glyma.11G237500
6.17825e-14	0.338251	0.231	0.082	1.69062e-09	4	Glyma.10G048500
6.28301e-14	0.389662	0.325	0.144	1.71928e-09	4	Glyma.07G182200
7.67701e-14	0.413861	0.753	0.481	2.10074e-09	4	Glyma.12G037400
7.74405e-14	0.387147	0.294	0.123	2.11908e-09	4	Glyma.12G181600
8.15373e-14	0.334205	0.212	0.072	2.23119e-09	4	Glyma.14G190200
8.45178e-14	0.381837	0.365	0.168	2.31275e-09	4	Glyma.05G051300
1.05825e-13	0.395048	0.322	0.139	2.8958e-09	4	Glyma.15G276800
1.23373e-13	0.342643	0.224	0.079	3.37597e-09	4	Glyma.04G001600
1.26463e-13	0.363773	0.275	0.111	3.46054e-09	4	Glyma.13G144000
1.28027e-13	0.377625	0.298	0.125	3.50334e-09	4	Glyma.20G104000
1.4851e-13	0.320138	0.239	0.087	4.06384e-09	4	Glyma.20G223600
1.48977e-13	0.329257	0.231	0.083	4.07661e-09	4	Glyma.11G233800
1.66804e-13	0.33792	0.271	0.106	4.56444e-09	4	Glyma.10G165600
1.70858e-13	0.393109	0.235	0.087	4.67535e-09	4	Glyma.13G115400
2.04084e-13	0.370463	0.4	0.191	5.58454e-09	4	Glyma.04G220200
2.12208e-13	0.332608	0.212	0.073	5.80686e-09	4	Glyma.03G212900
3.04896e-13	0.347902	0.231	0.084	8.34318e-09	4	Glyma.07G121900
3.45383e-13	0.35516	0.282	0.117	9.45105e-09	4	Glyma.16G168000
3.91463e-13	0.29827	0.212	0.073	1.0712e-08	4	Glyma.19G212900
3.91729e-13	0.314657	0.231	0.085	1.07193e-08	4	Glyma.01G055400
4.05607e-13	0.399674	0.471	0.245	1.1099e-08	4	Glyma.17G228800
4.71825e-13	0.412647	0.624	0.373	1.2911e-08	4	Glyma.11G111400
5.08387e-13	0.331444	0.243	0.092	1.39115e-08	4	Glyma.02G200700
6.16876e-13	0.346164	0.306	0.13	1.68802e-08	4	Glyma.09G095400
6.56507e-13	0.364435	0.365	0.169	1.79647e-08	4	Glyma.19G147400
6.62822e-13	0.351621	0.298	0.127	1.81375e-08	4	Glyma.13G041200
6.78741e-13	0.366643	0.286	0.122	1.85731e-08	4	Glyma.13G276700
7.21484e-13	0.320608	0.208	0.073	1.97427e-08	4	Glyma.04G001500
8.11554e-13	0.366266	0.275	0.113	2.22074e-08	4	Glyma.12G030100
8.68121e-13	0.330849	0.251	0.099	2.37553e-08	4	Glyma.11G110000
9.69867e-13	0.371849	0.361	0.171	2.65394e-08	4	Glyma.17G137600
1.0257e-12	0.313489	0.208	0.073	2.80672e-08	4	Glyma.08G070500
1.23847e-12	0.308845	0.224	0.082	3.38895e-08	4	Glyma.05G156300
1.41284e-12	0.339726	0.302	0.133	3.8661e-08	4	Glyma.09G050800
1.43076e-12	0.378761	0.369	0.18	3.91513e-08	4	Glyma.15G094700
1.52624e-12	0.298063	0.231	0.086	4.1764e-08	4	Glyma.10G137800
1.57794e-12	0.351712	0.29	0.125	4.31788e-08	4	Glyma.07G262100
1.74093e-12	0.317687	0.259	0.102	4.76389e-08	4	Glyma.13G204700
1.84317e-12	0.346115	0.255	0.103	5.04366e-08	4	Glyma.15G177500
2.13837e-12	0.355753	0.349	0.164	5.85145e-08	4	Glyma.13G000800
2.1452e-12	0.292174	0.243	0.093	5.87013e-08	4	Glyma.02G267800
2.34589e-12	0.338243	0.255	0.104	6.41928e-08	4	Glyma.03G247100
2.40192e-12	0.332963	0.22	0.081	6.5726e-08	4	Glyma.06G271200
2.90959e-12	0.307181	0.204	0.072	7.9618e-08	4	Glyma.08G272600
3.02578e-12	0.306438	0.2	0.071	8.27973e-08	4	Glyma.07G228300
3.12992e-12	0.325969	0.251	0.101	8.56472e-08	4	Glyma.15G044400
3.76249e-12	0.300743	0.224	0.084	1.02957e-07	4	Glyma.19G126700
4.81708e-12	0.339335	0.271	0.116	1.31815e-07	4	Glyma.17G003900
5.07747e-12	0.378174	0.392	0.197	1.3894e-07	4	Glyma.20G171400
5.08056e-12	0.375082	0.369	0.182	1.39025e-07	4	Glyma.02G022000
6.03081e-12	0.375319	0.655	0.435	1.65027e-07	4	Glyma.14G129500
6.28083e-12	0.401634	0.373	0.19	1.71869e-07	4	Glyma.04G141400
7.40814e-12	0.378576	0.69	0.441	2.02716e-07	4	Glyma.14G003400
8.17722e-12	0.399193	0.341	0.167	2.23761e-07	4	Glyma.13G084000
8.46345e-12	0.317479	0.259	0.108	2.31594e-07	4	Glyma.10G103000
9.31533e-12	-0.566553	0.235	0.422	2.54905e-07	4	Glyma.10G169600
9.89208e-12	0.339398	0.294	0.131	2.70687e-07	4	Glyma.11G246700
1.10496e-11	0.332613	0.302	0.136	3.02361e-07	4	Glyma.07G057200
1.24892e-11	0.306737	0.247	0.1	3.41754e-07	4	Glyma.09G062700
1.32296e-11	0.268439	0.208	0.076	3.62015e-07	4	Glyma.12G085900
1.55356e-11	0.335273	0.247	0.102	4.25116e-07	4	Glyma.08G241600
1.63878e-11	0.379574	0.373	0.191	4.48435e-07	4	Glyma.18G149300
1.85542e-11	0.311659	0.2	0.074	5.07716e-07	4	Glyma.08G255200
2.08932e-11	0.362753	0.475	0.246	5.71722e-07	4	Glyma.11G111100
2.11534e-11	0.320405	0.208	0.079	5.78843e-07	4	Glyma.06G120500
2.19901e-11	0.320882	0.259	0.11	6.01738e-07	4	Glyma.13G062700
2.32416e-11	0.322621	0.204	0.078	6.35984e-07	4	Glyma.18G111900
2.57208e-11	0.338052	0.294	0.133	7.03825e-07	4	Glyma.19G192800
2.70972e-11	-0.517798	0.071	0.255	7.41486e-07	4	Glyma.16G178000
2.93092e-11	0.356433	0.243	0.102	8.02016e-07	4	Glyma.13G030900
3.01752e-11	0.313342	0.259	0.11	8.25715e-07	4	Glyma.20G058100
3.02175e-11	0.32467	0.278	0.122	8.26871e-07	4	Glyma.14G129400
3.09117e-11	0.320597	0.231	0.094	8.45868e-07	4	Glyma.09G223600
3.29934e-11	0.323415	0.216	0.085	9.02831e-07	4	Glyma.13G079900
3.50001e-11	0.348231	0.384	0.198	9.57744e-07	4	Glyma.09G247900
3.79626e-11	0.359973	0.345	0.172	1.03881e-06	4	Glyma.14G031200
3.79764e-11	0.370829	0.427	0.232	1.03919e-06	4	Glyma.01G145400
7.02036e-11	0.315231	0.29	0.133	1.92105e-06	4	Glyma.08G174200
7.18268e-11	0.348878	0.29	0.134	1.96547e-06	4	Glyma.01G161500
7.72593e-11	0.347994	0.322	0.156	2.11412e-06	4	Glyma.17G197700
9.41478e-11	0.29283	0.216	0.086	2.57626e-06	4	Glyma.17G133200
1.16013e-10	0.311546	0.267	0.12	3.17459e-06	4	Glyma.05G177000
1.19346e-10	0.312005	0.271	0.12	3.26579e-06	4	Glyma.11G158200
1.21748e-10	0.320468	0.22	0.09	3.33151e-06	4	Glyma.15G266100
1.26893e-10	0.276939	0.231	0.094	3.4723e-06	4	Glyma.20G159900
1.4454e-10	0.323327	0.231	0.099	3.95519e-06	4	Glyma.08G219200
1.45327e-10	0.367367	0.302	0.148	3.97672e-06	4	Glyma.12G130000
1.58657e-10	0.275088	0.22	0.088	4.34148e-06	4	Glyma.01G226700
1.60008e-10	0.333673	0.208	0.084	4.37847e-06	4	Glyma.06G127700
1.60362e-10	0.340362	0.204	0.081	4.38814e-06	4	Glyma.06G018700
1.64654e-10	0.304279	0.231	0.096	4.5056e-06	4	Glyma.10G151000
2.06014e-10	0.343347	0.404	0.213	5.63736e-06	4	Glyma.11G226900
2.29207e-10	0.288042	0.227	0.094	6.27202e-06	4	Glyma.13G371900
2.39426e-10	0.293498	0.216	0.088	6.55166e-06	4	Glyma.10G130200
2.86076e-10	0.211619	0.949	0.824	7.82818e-06	4	Glyma.13G046200
3.23032e-10	0.324327	0.259	0.119	8.83943e-06	4	Glyma.20G218200
3.3436e-10	0.269986	0.204	0.081	9.14943e-06	4	Glyma.13G010500
3.44712e-10	0.298592	0.227	0.096	9.4327e-06	4	Glyma.15G275900
3.48386e-10	0.282688	0.208	0.084	9.53323e-06	4	Glyma.18G234300
3.5341e-10	0.298538	0.235	0.101	9.67072e-06	4	Glyma.17G192200
3.73564e-10	0.321982	0.29	0.138	1.02222e-05	4	Glyma.11G043400
5.07869e-10	0.335075	0.475	0.262	1.38973e-05	4	Glyma.10G293500
5.30743e-10	0.27954	0.22	0.092	1.45232e-05	4	Glyma.16G218500
5.44955e-10	-0.464161	0.051	0.21	1.49121e-05	4	Glyma.10G212300
5.49974e-10	0.290091	0.267	0.121	1.50495e-05	4	Glyma.15G253000
5.53901e-10	0.296059	0.227	0.097	1.51569e-05	4	Glyma.10G249800
5.72094e-10	-0.4402	0.043	0.201	1.56548e-05	4	Glyma.09G131100
5.8346e-10	0.344848	0.733	0.499	1.59658e-05	4	Glyma.09G154700
5.88443e-10	0.329362	0.333	0.172	1.61022e-05	4	Glyma.18G244900
6.03077e-10	0.339688	0.631	0.419	1.65026e-05	4	Glyma.03G137000
6.23923e-10	0.249153	0.208	0.083	1.7073e-05	4	Glyma.13G220000
6.28952e-10	0.342982	0.522	0.308	1.72106e-05	4	Glyma.15G102000
7.14266e-10	0.353084	0.518	0.32	1.95452e-05	4	Glyma.19G123800
8.00681e-10	0.272036	0.224	0.094	2.19098e-05	4	Glyma.18G019700
8.39058e-10	0.319562	0.314	0.159	2.296e-05	4	Glyma.02G007700
9.94206e-10	0.360551	0.267	0.126	2.72055e-05	4	Glyma.12G112000
1.07614e-09	-0.531662	0.051	0.205	2.94474e-05	4	Glyma.02G001500
1.11114e-09	0.27571	0.231	0.101	3.04052e-05	4	Glyma.16G018500
1.20986e-09	0.256835	0.208	0.085	3.31067e-05	4	Glyma.08G140900
1.26885e-09	0.279431	0.212	0.089	3.47207e-05	4	Glyma.02G147400
1.36359e-09	0.307642	0.275	0.132	3.73132e-05	4	Glyma.18G281500
1.37576e-09	0.325685	0.435	0.246	3.76464e-05	4	Glyma.18G150000
1.38924e-09	-0.58803	0.071	0.228	3.80153e-05	4	Glyma.15G101800
1.39375e-09	0.280431	0.239	0.105	3.81385e-05	4	Glyma.13G114800
1.43024e-09	0.286295	0.212	0.09	3.91371e-05	4	Glyma.18G153300
1.53994e-09	0.300126	0.212	0.09	4.21389e-05	4	Glyma.02G272400
1.54184e-09	0.326011	0.408	0.225	4.2191e-05	4	Glyma.20G243500
1.62564e-09	0.27933	0.247	0.108	4.4484e-05	4	Glyma.08G171000
1.66033e-09	0.340163	0.325	0.172	4.54333e-05	4	Glyma.07G252600
1.6873e-09	0.324806	0.31	0.158	4.61714e-05	4	Glyma.14G215400
2.0037e-09	0.293276	0.255	0.118	5.48291e-05	4	Glyma.18G278100
2.10531e-09	0.346732	0.271	0.133	5.76096e-05	4	Glyma.09G182600
2.34831e-09	-0.508053	0.145	0.312	6.42592e-05	4	Glyma.06G259400
2.75122e-09	0.248952	0.204	0.084	7.52845e-05	4	Glyma.10G113100
3.01293e-09	0.309413	0.243	0.113	8.24459e-05	4	Glyma.06G189900
3.32077e-09	-0.512919	0.055	0.205	9.08696e-05	4	Glyma.16G135200
3.65326e-09	-0.444368	0.243	0.401	9.99677e-05	4	Glyma.05G079700
4.89182e-09	0.29182	0.251	0.119	0.00013386	4	Glyma.10G134100
5.37622e-09	0.301675	0.282	0.14	0.000147115	4	Glyma.03G248600
5.68899e-09	0.30874	0.325	0.17	0.000155674	4	Glyma.05G085400
5.69333e-09	0.324282	0.337	0.18	0.000155792	4	Glyma.10G271200
5.8346e-09	0.329548	0.31	0.167	0.000159658	4	Glyma.01G198500
6.86713e-09	0.269663	0.275	0.133	0.000187912	4	Glyma.10G005000
7.16465e-09	0.301299	0.329	0.174	0.000196054	4	Glyma.17G174500
8.54169e-09	0.258926	0.251	0.117	0.000233735	4	Glyma.06G218300
8.93942e-09	0.297827	0.318	0.165	0.000244618	4	Glyma.10G281400
9.42415e-09	0.277201	0.235	0.109	0.000257882	4	Glyma.05G030700
9.63547e-09	0.289263	0.251	0.121	0.000263665	4	Glyma.03G192300
9.72817e-09	0.293484	0.255	0.122	0.000266202	4	Glyma.07G125600
9.8709e-09	0.313745	0.259	0.129	0.000270107	4	Glyma.14G133600
1.01206e-08	0.265153	0.239	0.111	0.000276941	4	Glyma.06G174200
1.12615e-08	0.285918	0.302	0.156	0.00030816	4	Glyma.04G191700
1.18173e-08	0.30756	0.231	0.109	0.00032337	4	Glyma.17G069202
1.18277e-08	0.338558	0.569	0.358	0.000323652	4	Glyma.14G109700
1.36527e-08	0.311951	0.427	0.251	0.000373593	4	Glyma.13G175100
1.42552e-08	0.301261	0.365	0.204	0.00039008	4	Glyma.07G201300
1.43762e-08	0.328957	0.286	0.147	0.00039339	4	Glyma.07G093700
1.49054e-08	0.300866	0.365	0.201	0.00040787	4	Glyma.07G136500
1.50436e-08	0.291457	0.282	0.143	0.000411652	4	Glyma.17G204000
1.53576e-08	0.276643	0.216	0.098	0.000420245	4	Glyma.16G219400
1.53926e-08	0.295267	0.306	0.159	0.000421203	4	Glyma.15G185800
1.83256e-08	0.257668	0.216	0.096	0.000501461	4	Glyma.12G109800
2.01341e-08	0.271269	0.22	0.1	0.000550951	4	Glyma.08G333700
2.10445e-08	0.312023	0.471	0.285	0.000575863	4	Glyma.09G193300
2.21554e-08	-0.45073	0.192	0.345	0.00060626	4	Glyma.01G132500
2.25719e-08	-0.432882	0.098	0.251	0.000617659	4	Glyma.18G043600
2.31758e-08	-0.540373	0.153	0.31	0.000634183	4	Glyma.03G053500
2.43019e-08	0.256581	0.251	0.121	0.000664997	4	Glyma.17G000700
2.65426e-08	0.252899	0.227	0.106	0.000726312	4	Glyma.09G183900
2.86746e-08	0.309411	0.522	0.326	0.000784652	4	Glyma.16G016100
2.92134e-08	0.303135	0.353	0.196	0.000799394	4	Glyma.14G222500
3.03228e-08	0.305055	0.333	0.186	0.000829754	4	Glyma.11G135900
3.14713e-08	0.239139	0.212	0.095	0.00086118	4	Glyma.03G262100
5.02844e-08	0.310523	0.51	0.312	0.00137598	4	Glyma.02G249600
5.18834e-08	0.255876	0.271	0.136	0.00141974	4	Glyma.20G107800
5.67687e-08	0.242703	0.204	0.091	0.00155342	4	Glyma.10G122100
6.50866e-08	0.265793	0.263	0.133	0.00178103	4	Glyma.20G122600
6.64205e-08	0.285038	0.271	0.14	0.00181753	4	Glyma.15G237600
6.76107e-08	0.290337	0.275	0.144	0.0018501	4	Glyma.09G139200
6.76859e-08	0.245834	0.22	0.104	0.00185216	4	Glyma.05G230700
6.98761e-08	0.260048	0.227	0.11	0.00191209	4	Glyma.08G239000
7.35033e-08	0.244551	0.278	0.141	0.00201134	4	Glyma.16G026200
7.67979e-08	0.278341	0.224	0.109	0.0021015	4	Glyma.11G100800
8.62359e-08	0.229027	0.235	0.112	0.00235976	4	Glyma.16G017600
8.69512e-08	0.24912	0.259	0.13	0.00237933	4	Glyma.01G157900
9.04717e-08	-0.360245	0.286	0.431	0.00247567	4	Glyma.04G229900
9.58111e-08	0.271375	0.286	0.151	0.00262177	4	Glyma.08G282400
9.87006e-08	0.309893	0.525	0.333	0.00270084	4	Glyma.09G210900
1.16134e-07	0.277315	0.243	0.123	0.00317789	4	Glyma.07G022300
1.2706e-07	0.233468	0.212	0.099	0.00347686	4	Glyma.15G243100
1.28065e-07	0.248636	0.2	0.093	0.00350438	4	Glyma.04G057200
1.37068e-07	0.287577	0.4	0.238	0.00375074	4	Glyma.09G190300
1.40777e-07	-0.418371	0.184	0.323	0.00385221	4	Glyma.15G238600
1.86189e-07	0.297992	0.275	0.15	0.00509486	4	Glyma.04G249400
1.86537e-07	0.26262	0.255	0.132	0.0051044	4	Glyma.06G294100
2.01655e-07	0.265024	0.247	0.128	0.00551808	4	Glyma.04G174400
2.04877e-07	-0.370179	0.075	0.214	0.00560626	4	Glyma.09G130400
2.0952e-07	0.262754	0.361	0.204	0.00573331	4	Glyma.04G096300
2.23526e-07	0.295768	0.596	0.387	0.00611655	4	Glyma.10G177200
2.36421e-07	0.275342	0.369	0.216	0.00646942	4	Glyma.02G184800
2.55836e-07	0.25	0.255	0.132	0.0070007	4	Glyma.05G025300
2.64291e-07	0.240564	0.235	0.116	0.00723207	4	Glyma.07G150400
2.79324e-07	0.269621	0.22	0.109	0.00764343	4	Glyma.10G286300
2.91855e-07	0.282749	0.365	0.217	0.00798632	4	Glyma.14G155900
3.2031e-07	0.229182	0.216	0.104	0.00876496	4	Glyma.20G218600
3.53966e-07	0.235884	0.212	0.102	0.00968591	4	Glyma.11G016000
3.91394e-07	0.290773	0.404	0.248	0.0107101	4	Glyma.03G083100
4.12536e-07	0.237406	0.224	0.112	0.0112886	4	Glyma.14G177200
4.17097e-07	0.262425	0.353	0.199	0.0114134	4	Glyma.03G261500
4.17139e-07	0.237207	0.208	0.1	0.0114146	4	Glyma.05G165800
4.30904e-07	0.25985	0.388	0.23	0.0117913	4	Glyma.17G066600
4.71636e-07	0.273939	0.427	0.254	0.0129058	4	Glyma.13G129500
4.74178e-07	0.237392	0.227	0.115	0.0129754	4	Glyma.16G147800
5.4651e-07	-0.419355	0.184	0.319	0.0149547	4	Glyma.03G134200
5.6348e-07	-0.374492	0.129	0.271	0.0154191	4	Glyma.05G215900
5.64327e-07	0.281184	0.455	0.279	0.0154422	4	Glyma.03G230000
6.99426e-07	0.279921	0.286	0.162	0.0191391	4	Glyma.11G154700
7.09261e-07	0.28626	0.506	0.345	0.0194082	4	Glyma.03G119500
7.32591e-07	0.235572	0.208	0.102	0.0200466	4	Glyma.14G093200
7.51087e-07	0.243257	0.2	0.097	0.0205527	4	Glyma.13G212900
7.64265e-07	0.28777	0.369	0.225	0.0209133	4	Glyma.13G162800
7.85227e-07	0.224766	0.216	0.108	0.0214869	4	Glyma.02G203300
8.87396e-07	0.307487	0.376	0.233	0.0242827	4	Glyma.08G142000
9.02316e-07	0.286816	0.631	0.43	0.024691	4	Glyma.16G044900
9.37971e-07	0.270969	0.247	0.132	0.0256666	4	Glyma.14G223400
9.38889e-07	0.227362	0.243	0.128	0.0256918	4	Glyma.03G069600
1.14257e-06	0.230792	0.224	0.115	0.0312654	4	Glyma.13G225000
1.27041e-06	0.327534	0.235	0.13	0.0347635	4	Glyma.02G114100
1.424e-06	0.222555	0.208	0.104	0.0389663	4	Glyma.16G207900
1.54762e-06	0.248491	0.337	0.196	0.042349	4	Glyma.16G103500
1.88436e-06	0.227477	0.224	0.117	0.0515637	4	Glyma.02G279500
1.99438e-06	0.237539	0.212	0.108	0.0545743	4	Glyma.07G029900
2.05667e-06	-0.39289	0.106	0.227	0.0562788	4	Glyma.10G169300
2.0728e-06	0.251594	0.392	0.231	0.0567201	4	Glyma.12G199400
2.0848e-06	-0.369771	0.165	0.285	0.0570486	4	Glyma.06G173500
2.16637e-06	0.205469	0.235	0.122	0.0592806	4	Glyma.13G127200
2.28421e-06	0.272177	0.518	0.342	0.0625052	4	Glyma.08G328800
2.40317e-06	0.214346	0.204	0.102	0.0657604	4	Glyma.19G045600
2.43414e-06	0.240366	0.231	0.124	0.0666078	4	Glyma.16G141500
2.57582e-06	-0.332594	0.09	0.211	0.0704846	4	Glyma.14G074700
2.65826e-06	-0.400243	0.114	0.23	0.0727405	4	Glyma.08G199500
2.7882e-06	0.228283	0.286	0.162	0.0762963	4	Glyma.17G101700
3.0966e-06	-0.353984	0.114	0.236	0.0847355	4	Glyma.08G339400
3.19239e-06	0.238699	0.212	0.11	0.0873567	4	Glyma.13G215000
3.42222e-06	0.26576	0.471	0.321	0.0936457	4	Glyma.02G260800
3.78304e-06	0.255126	0.251	0.14	0.103519	4	Glyma.06G293400
4.60175e-06	0.217382	0.227	0.123	0.125922	4	Glyma.18G243000
5.76762e-06	0.252332	0.467	0.295	0.157825	4	Glyma.02G141700
6.45838e-06	-0.350112	0.165	0.279	0.176727	4	Glyma.13G027300
7.55993e-06	0.226004	0.427	0.26	0.20687	4	Glyma.10G078400
8.24956e-06	-0.360324	0.224	0.344	0.225741	4	Glyma.09G248600
9.10869e-06	0.257274	0.553	0.379	0.24925	4	Glyma.04G008300
9.23597e-06	0.230243	0.239	0.135	0.252733	4	Glyma.17G034900
9.73759e-06	0.248075	0.463	0.307	0.266459	4	Glyma.10G174800
1.04114e-05	-0.39952	0.18	0.302	0.284898	4	Glyma.06G137000
1.09258e-05	0.242412	0.682	0.501	0.298973	4	Glyma.19G187300
1.20333e-05	-0.343482	0.106	0.216	0.32928	4	Glyma.19G114700
1.47643e-05	0.251662	0.439	0.301	0.40401	4	Glyma.06G165200
1.49228e-05	0.207441	0.31	0.183	0.408349	4	Glyma.20G082800
1.53723e-05	0.240422	0.471	0.308	0.420647	4	Glyma.14G115500
1.59882e-05	0.214727	0.251	0.143	0.4375	4	Glyma.17G104200
1.68828e-05	0.217192	0.267	0.157	0.46198	4	Glyma.15G120300
1.6912e-05	0.223715	0.247	0.142	0.462781	4	Glyma.08G162200
1.71561e-05	0.22739	0.357	0.226	0.46946	4	Glyma.02G034300
1.81353e-05	0.236032	0.459	0.307	0.496255	4	Glyma.14G021800
1.83783e-05	0.205436	0.243	0.136	0.502905	4	Glyma.11G042200
2.25473e-05	-0.305337	0.098	0.204	0.616985	4	Glyma.20G066100
2.40511e-05	0.205942	0.263	0.153	0.658134	4	Glyma.19G115400
2.80219e-05	-0.307972	0.2	0.317	0.766792	4	Glyma.05G236300
2.86169e-05	0.217478	0.318	0.195	0.783072	4	Glyma.05G089200
2.86995e-05	0.221941	0.247	0.146	0.785332	4	Glyma.17G075300
3.18485e-05	-0.348129	0.141	0.248	0.871502	4	Glyma.18G244100
3.64138e-05	0.225992	0.455	0.298	0.996427	4	Glyma.01G010200
3.67161e-05	0.215316	0.302	0.188	1	4	Glyma.04G218900
3.97231e-05	0.221856	0.259	0.158	1	4	Glyma.13G089200
4.01338e-05	0.217458	0.439	0.28	1	4	Glyma.07G019700
4.40036e-05	0.242428	0.6	0.415	1	4	Glyma.02G309500
4.92163e-05	0.243457	0.682	0.489	1	4	Glyma.16G205200
4.93875e-05	0.224593	0.404	0.258	1	4	Glyma.09G087700
5.00016e-05	-0.354993	0.149	0.25	1	4	Glyma.17G069100
5.20954e-05	0.221878	0.498	0.323	1	4	Glyma.04G215800
5.22288e-05	0.227867	0.345	0.226	1	4	Glyma.04G015900
5.23608e-05	0.216521	0.267	0.163	1	4	Glyma.04G247700
5.54927e-05	0.21631	0.345	0.222	1	4	Glyma.04G017500
5.78275e-05	0.212888	0.404	0.256	1	4	Glyma.13G302900
5.93508e-05	0.218666	0.702	0.547	1	4	Glyma.15G274900
6.78995e-05	0.211012	0.361	0.228	1	4	Glyma.02G198400
6.94989e-05	0.211876	0.278	0.173	1	4	Glyma.05G131500
6.9691e-05	0.211863	0.388	0.25	1	4	Glyma.12G092000
8.01393e-05	-0.303309	0.133	0.235	1	4	Glyma.13G330400
8.74267e-05	-0.31135	0.169	0.269	1	4	Glyma.13G157300
9.78747e-05	0.22875	0.541	0.374	1	4	Glyma.04G167900
0.000103875	0.212835	0.294	0.191	1	4	Glyma.14G106500
0.000111434	0.201644	0.412	0.265	1	4	Glyma.02G282500
0.000126532	0.215939	0.518	0.374	1	4	Glyma.13G245200
0.000137959	0.214048	0.278	0.178	1	4	Glyma.18G216100
0.000148799	0.208997	0.306	0.201	1	4	Glyma.13G093800
0.000152479	0.202243	0.443	0.293	1	4	Glyma.12G219300
0.000154079	0.209453	0.475	0.326	1	4	Glyma.11G101700
0.000163519	0.209765	0.365	0.249	1	4	Glyma.04G123500
0.00019559	0.205876	0.643	0.505	1	4	Glyma.19G054201
0.000220764	0.203779	0.294	0.192	1	4	Glyma.12G166200
0.000247696	0.204557	0.471	0.336	1	4	Glyma.02G103900
0.000262222	0.207853	0.467	0.331	1	4	Glyma.18G155400
0.000300406	0.209757	0.341	0.236	1	4	Glyma.19G193800
0.000301756	0.20449	0.51	0.348	1	4	Glyma.16G145800
0.00033797	0.209764	0.545	0.39	1	4	Glyma.09G178600
0.000386864	0.202196	0.341	0.235	1	4	Glyma.17G100700
0.000397909	0.202074	0.588	0.448	1	4	Glyma.07G215300
0.000428291	0.208185	0.337	0.228	1	4	Glyma.18G200500
0.000564173	0.207482	0.522	0.393	1	4	Glyma.03G094400
1.37837e-135	1.46961	0.679	0.072	3.77178e-131	5	Glyma.07G144100
4.97517e-126	1.43827	0.707	0.092	1.3614e-121	5	Glyma.03G052800
9.38785e-125	1.41204	0.668	0.078	2.56889e-120	5	Glyma.07G143900
1.38943e-111	1.60148	0.875	0.234	3.80203e-107	5	Glyma.03G053500
1.72048e-111	1.38543	0.647	0.084	4.70793e-107	5	Glyma.03G054600
2.1805e-108	1.25406	0.603	0.072	5.96673e-104	5	Glyma.03G054500
3.33324e-106	1.16266	0.5	0.043	9.12107e-102	5	Glyma.07G143500
8.06268e-99	1.2972	0.565	0.071	2.20627e-94	5	Glyma.09G168700
9.46856e-91	1.39336	0.826	0.234	2.59098e-86	5	Glyma.18G195200
1.74637e-82	0.835151	0.332	0.019	4.77877e-78	5	Glyma.16G218300
9.22226e-81	0.938782	0.391	0.033	2.52358e-76	5	Glyma.13G029300
1.18345e-80	0.886788	0.321	0.018	3.23838e-76	5	Glyma.08G197700
5.07702e-80	1.191	0.538	0.078	1.38928e-75	5	Glyma.10G229400
6.05319e-74	0.829331	0.348	0.028	1.6564e-69	5	Glyma.03G053602
1.93906e-70	1.11928	0.647	0.141	5.30604e-66	5	Glyma.15G021400
2.69268e-66	0.854052	0.353	0.035	7.36825e-62	5	Glyma.16G169500
2.71325e-65	0.706256	0.255	0.014	7.42453e-61	5	Glyma.08G198800
4.39976e-65	0.659745	0.283	0.019	1.20395e-60	5	Glyma.08G017900
1.81571e-64	1.0912	0.707	0.189	4.9685e-60	5	Glyma.18G244100
2.45913e-61	0.643671	0.25	0.015	6.72917e-57	5	Glyma.09G168600
1.06537e-57	0.833963	0.37	0.046	2.91529e-53	5	Glyma.03G074000
4.92344e-57	0.726268	0.288	0.025	1.34725e-52	5	Glyma.05G211600
3.82164e-54	1.01338	0.761	0.287	1.04575e-49	5	Glyma.09G248600
4.26233e-54	0.786757	0.304	0.032	1.16634e-49	5	Glyma.09G115200
3.53466e-52	0.63643	0.239	0.018	9.67225e-48	5	Glyma.08G198900
2.94861e-51	0.688708	0.304	0.034	8.06856e-47	5	Glyma.13G029200
1.04147e-50	0.896746	0.5	0.11	2.84988e-46	5	Glyma.13G033000
1.73191e-48	0.866759	0.364	0.057	4.73921e-44	5	Glyma.15G219400
5.26008e-48	0.83122	0.418	0.078	1.43937e-43	5	Glyma.04G121000
1.02074e-46	0.813812	0.446	0.092	2.79316e-42	5	Glyma.19G139800
1.06843e-46	0.726861	0.293	0.036	2.92366e-42	5	Glyma.10G229500
3.84457e-46	0.709348	0.272	0.031	1.05203e-41	5	Glyma.06G191300
1.92282e-45	0.630444	0.277	0.032	5.26161e-41	5	Glyma.11G208300
1.31208e-44	0.522237	0.201	0.014	3.59038e-40	5	Glyma.18G219600
1.31939e-44	0.539143	0.212	0.017	3.61037e-40	5	Glyma.16G016700
1.70852e-43	0.593833	0.266	0.031	4.6752e-39	5	Glyma.15G258400
1.80254e-43	0.86154	0.511	0.131	4.93247e-39	5	Glyma.08G321400
3.89246e-43	0.566752	0.201	0.015	1.06513e-38	5	Glyma.11G083800
9.47372e-43	0.642847	0.272	0.034	2.59239e-38	5	Glyma.16G169200
1.15003e-41	0.873709	0.484	0.126	3.14694e-37	5	Glyma.13G156500
1.06578e-40	0.668667	0.326	0.053	2.9164e-36	5	Glyma.10G098400
5.762e-40	0.845555	0.598	0.188	1.57671e-35	5	Glyma.08G339500
5.76229e-39	0.894692	0.62	0.218	1.57679e-34	5	Glyma.06G263900
2.42496e-38	0.903603	0.658	0.268	6.63565e-34	5	Glyma.03G134200
4.97444e-38	0.822341	0.5	0.139	1.3612e-33	5	Glyma.12G022700
5.2645e-37	0.901595	0.408	0.096	1.44058e-32	5	Glyma.18G216800
6.53189e-36	0.787202	0.489	0.136	1.78739e-31	5	Glyma.13G033500
4.24561e-35	0.54174	0.223	0.027	1.16177e-30	5	Glyma.18G254300
1.31049e-34	0.617067	0.321	0.06	3.58602e-30	5	Glyma.02G183400
2.59761e-34	0.765928	0.484	0.143	7.10809e-30	5	Glyma.14G219700
1.61824e-33	0.757268	0.364	0.084	4.42815e-29	5	Glyma.09G065300
1.74064e-33	0.774692	0.489	0.144	4.76309e-29	5	Glyma.07G095000
1.05468e-32	0.729899	0.332	0.072	2.88604e-28	5	Glyma.16G176900
1.69993e-32	0.703505	0.402	0.099	4.65169e-28	5	Glyma.07G067900
4.88197e-32	0.68473	0.359	0.082	1.3359e-27	5	Glyma.13G028100
9.55702e-32	0.540894	0.245	0.037	2.61518e-27	5	Glyma.15G213600
2.12487e-31	0.676662	0.304	0.061	5.8145e-27	5	Glyma.01G108700
4.32591e-31	0.596678	0.245	0.039	1.18374e-26	5	Glyma.04G017200
4.86621e-31	0.595508	0.299	0.058	1.33159e-26	5	Glyma.11G050900
5.54158e-31	0.577514	0.255	0.043	1.5164e-26	5	Glyma.06G319460
2.65143e-30	0.665253	0.375	0.095	7.25537e-26	5	Glyma.16G079200
2.8194e-30	0.564657	0.277	0.052	7.71501e-26	5	Glyma.12G135600
6.2586e-30	0.7369	0.462	0.141	1.7126e-25	5	Glyma.06G317800
8.58578e-30	0.679467	0.397	0.107	2.34941e-25	5	Glyma.10G261200
1.48455e-29	0.489848	0.234	0.037	4.06232e-25	5	Glyma.06G239900
1.71646e-28	0.486526	0.201	0.028	4.69693e-24	5	Glyma.20G022900
1.78206e-28	0.568826	0.304	0.065	4.87644e-24	5	Glyma.15G156400
2.07407e-28	0.667659	0.359	0.093	5.67548e-24	5	Glyma.01G040400
3.48124e-28	0.534484	0.239	0.041	9.52608e-24	5	Glyma.10G178400
5.47916e-28	0.492893	0.201	0.028	1.49932e-23	5	Glyma.20G163900
6.60185e-28	0.714136	0.446	0.143	1.80653e-23	5	Glyma.17G258700
7.57886e-28	0.495934	0.207	0.031	2.07388e-23	5	Glyma.09G182400
1.82055e-27	0.475622	0.212	0.033	4.98176e-23	5	Glyma.09G049700
1.96443e-27	0.643941	0.397	0.108	5.37547e-23	5	Glyma.16G137000
3.4796e-27	0.547436	0.266	0.053	9.52157e-23	5	Glyma.11G190900
6.08134e-27	0.520374	0.261	0.051	1.6641e-22	5	Glyma.17G214100
1.2943e-26	0.732968	0.457	0.156	3.54173e-22	5	Glyma.06G264900
6.72022e-26	0.552219	0.31	0.075	1.83892e-21	5	Glyma.12G101400
8.48874e-26	0.574122	0.283	0.063	2.32286e-21	5	Glyma.07G095800
1.10773e-24	0.511823	0.299	0.072	3.03118e-20	5	Glyma.11G206700
1.652e-24	0.678726	0.5	0.185	4.52053e-20	5	Glyma.10G169300
2.32629e-24	0.632848	0.413	0.13	6.36567e-20	5	Glyma.08G339600
3.37958e-24	0.597962	0.38	0.116	9.24787e-20	5	Glyma.10G143900
3.81565e-24	0.599122	0.288	0.071	1.04412e-19	5	Glyma.06G116300
1.82239e-23	0.468502	0.234	0.046	4.98678e-19	5	Glyma.20G020200
3.48087e-23	0.465789	0.207	0.038	9.52504e-19	5	Glyma.03G054100
7.07236e-23	0.666137	0.527	0.225	1.93528e-18	5	Glyma.05G082200
1.06334e-22	0.454647	0.245	0.053	2.90971e-18	5	Glyma.13G244400
1.38195e-22	0.512452	0.261	0.06	3.78156e-18	5	Glyma.11G207000
5.67773e-22	0.576841	0.337	0.1	1.55365e-17	5	Glyma.07G103000
5.81694e-22	0.613815	0.332	0.096	1.59175e-17	5	Glyma.05G237200
6.38252e-22	0.465996	0.201	0.037	1.74651e-17	5	Glyma.13G358900
2.58785e-21	0.526878	0.245	0.057	7.08139e-17	5	Glyma.08G025700
4.05526e-21	0.506401	0.283	0.074	1.10968e-16	5	Glyma.12G224000
4.08847e-21	-0.741378	0.321	0.651	1.11877e-16	5	Glyma.15G057600
5.2469e-21	0.646648	0.386	0.134	1.43576e-16	5	Glyma.12G231800
9.46211e-21	0.51641	0.288	0.08	2.58921e-16	5	Glyma.10G175300
1.27749e-20	0.508863	0.283	0.074	3.49573e-16	5	Glyma.06G061900
5.01914e-20	0.554832	0.304	0.088	1.37344e-15	5	Glyma.18G237900
8.7e-20	0.500494	0.272	0.073	2.38067e-15	5	Glyma.15G115600
9.83107e-20	0.624366	0.533	0.263	2.69017e-15	5	Glyma.18G281700
1.45163e-19	-0.433834	0.679	0.855	3.97225e-15	5	Glyma.13G046200
3.24566e-19	0.58923	0.451	0.175	8.88144e-15	5	Glyma.15G160300
5.0448e-19	0.482649	0.283	0.08	1.38046e-14	5	Glyma.10G253200
5.67214e-19	0.546927	0.288	0.085	1.55213e-14	5	Glyma.02G086100
6.39065e-19	0.587941	0.495	0.218	1.74874e-14	5	Glyma.01G086201
6.76593e-19	0.421962	0.212	0.047	1.85143e-14	5	Glyma.03G227400
6.90047e-19	0.550963	0.386	0.143	1.88825e-14	5	Glyma.15G166700
9.67525e-19	0.512109	0.326	0.104	2.64753e-14	5	Glyma.02G014000
1.62087e-18	0.501437	0.272	0.079	4.43535e-14	5	Glyma.04G190400
2.19011e-18	0.429085	0.207	0.047	5.993e-14	5	Glyma.09G099100
4.2866e-18	0.549201	0.332	0.112	1.17299e-13	5	Glyma.09G181600
7.78033e-18	0.448258	0.234	0.06	2.12901e-13	5	Glyma.15G059700
9.18605e-18	0.522887	0.707	0.474	2.51367e-13	5	Glyma.03G136000
1.09544e-17	0.496431	0.272	0.078	2.99757e-13	5	Glyma.17G057800
2.1084e-17	0.386382	0.201	0.046	5.76943e-13	5	Glyma.15G069100
2.70747e-17	0.42108	0.234	0.061	7.40871e-13	5	Glyma.17G214900
4.27845e-17	0.52687	0.321	0.105	1.17076e-12	5	Glyma.09G053700
4.36123e-17	0.461333	0.293	0.091	1.19341e-12	5	Glyma.07G095900
5.26839e-17	0.533381	0.38	0.148	1.44164e-12	5	Glyma.09G018900
5.78397e-17	0.393597	0.201	0.047	1.58272e-12	5	Glyma.04G013000
1.18303e-16	0.437391	0.223	0.059	3.23725e-12	5	Glyma.18G287800
1.2128e-16	0.47161	0.272	0.083	3.3187e-12	5	Glyma.19G255300
1.21289e-16	0.441767	0.245	0.069	3.31894e-12	5	Glyma.08G002100
1.46931e-16	0.541878	0.353	0.128	4.02063e-12	5	Glyma.13G032600
1.84124e-16	0.406479	0.234	0.063	5.03838e-12	5	Glyma.05G119500
2.11628e-16	0.365108	0.201	0.049	5.791e-12	5	Glyma.09G256000
2.1651e-16	0.468489	0.228	0.063	5.92457e-12	5	Glyma.05G219400
2.43815e-16	0.45445	0.212	0.054	6.67175e-12	5	Glyma.01G133100
3.24472e-16	0.497626	0.293	0.095	8.87885e-12	5	Glyma.08G044400
1.31406e-15	-0.576733	0.342	0.6	3.59579e-11	5	Glyma.07G112000
1.72065e-15	0.484489	0.31	0.108	4.70838e-11	5	Glyma.08G339300
2.32433e-15	0.548425	0.543	0.267	6.3603e-11	5	Glyma.06G259400
2.97645e-15	0.526616	0.457	0.205	8.14475e-11	5	Glyma.05G204600
3.78184e-15	0.485917	0.315	0.113	1.03486e-10	5	Glyma.02G288600
3.9184e-15	0.468413	0.272	0.088	1.07223e-10	5	Glyma.16G137200
4.76677e-15	0.482368	0.31	0.112	1.30438e-10	5	Glyma.04G230000
5.27917e-15	0.548233	0.511	0.265	1.44459e-10	5	Glyma.17G188300
7.81821e-15	0.446117	0.293	0.1	2.13938e-10	5	Glyma.19G054700
1.23213e-14	0.415133	0.201	0.055	3.3716e-10	5	Glyma.13G065900
1.48966e-14	0.497238	0.321	0.125	4.0763e-10	5	Glyma.14G151100
2.60989e-14	0.405243	0.239	0.073	7.14169e-10	5	Glyma.16G008600
5.85978e-14	0.3803	0.201	0.056	1.60347e-09	5	Glyma.13G003700
7.03124e-14	0.448858	0.288	0.102	1.92403e-09	5	Glyma.16G210600
8.94408e-14	0.521581	0.473	0.251	2.44746e-09	5	Glyma.06G173500
1.64923e-13	0.486498	0.375	0.159	4.51296e-09	5	Glyma.16G177900
3.18754e-13	0.371996	0.228	0.071	8.72238e-09	5	Glyma.10G230000
5.3272e-13	-0.290284	0.761	0.871	1.45774e-08	5	Glyma.14G158500
5.81836e-13	0.473681	0.304	0.121	1.59214e-08	5	Glyma.03G138200
6.09374e-13	0.407029	0.239	0.08	1.66749e-08	5	Glyma.03G088400
7.06174e-13	-0.52444	0.37	0.603	1.93237e-08	5	Glyma.05G022900
8.03884e-13	-0.462381	0.473	0.657	2.19975e-08	5	Glyma.11G221000
8.17456e-13	0.493796	0.408	0.198	2.23689e-08	5	Glyma.14G139800
9.34722e-13	0.415437	0.228	0.075	2.55777e-08	5	Glyma.06G142000
9.91234e-13	0.435421	0.299	0.116	2.71241e-08	5	Glyma.13G069800
1.09397e-12	0.41002	0.25	0.087	2.99354e-08	5	Glyma.11G171355
1.14077e-12	-0.563762	0.293	0.535	3.12162e-08	5	Glyma.12G037400
2.16778e-12	0.47888	0.457	0.222	5.93191e-08	5	Glyma.16G136600
2.59142e-12	-0.352686	0.62	0.783	7.09116e-08	5	Glyma.14G008000
2.62747e-12	0.461623	0.239	0.083	7.1898e-08	5	Glyma.19G113400
2.93357e-12	0.392941	0.272	0.101	8.02742e-08	5	Glyma.09G246600
3.75058e-12	-0.518457	0.326	0.555	1.02631e-07	5	Glyma.19G106800
4.20647e-12	-0.620066	0.103	0.35	1.15106e-07	5	Glyma.14G115500
4.64307e-12	0.34124	0.207	0.064	1.27053e-07	5	Glyma.17G104100
1.19037e-11	0.451705	0.418	0.202	3.25733e-07	5	Glyma.08G339400
1.29274e-11	0.402665	0.288	0.113	3.53745e-07	5	Glyma.12G233000
1.52529e-11	0.457237	0.342	0.154	4.17381e-07	5	Glyma.11G215500
2.19363e-11	0.463504	0.359	0.169	6.00265e-07	5	Glyma.20G071200
2.33749e-11	0.362445	0.25	0.09	6.39631e-07	5	Glyma.10G256400
2.35078e-11	0.43889	0.304	0.128	6.43268e-07	5	Glyma.15G015100
2.97341e-11	0.422719	0.266	0.106	8.13644e-07	5	Glyma.05G199200
3.35012e-11	-0.521416	0.283	0.505	9.16727e-07	5	Glyma.11G181100
3.50393e-11	-0.316945	0.701	0.822	9.58815e-07	5	Glyma.05G128000
3.84714e-11	0.465293	0.462	0.246	1.05273e-06	5	Glyma.07G004300
4.06237e-11	-0.574576	0.261	0.523	1.11163e-06	5	Glyma.04G180400
7.12857e-11	0.36201	0.245	0.09	1.95066e-06	5	Glyma.13G361900
9.19991e-11	0.420302	0.609	0.394	2.51746e-06	5	Glyma.04G229900
9.70841e-11	0.389681	0.25	0.095	2.65661e-06	5	Glyma.16G026400
1.18469e-10	0.336145	0.25	0.096	3.24178e-06	5	Glyma.08G157400
1.3422e-10	-0.604144	0.163	0.392	3.67278e-06	5	Glyma.08G126800
2.13628e-10	0.399985	0.277	0.117	5.84571e-06	5	Glyma.14G149300
2.60289e-10	0.384197	0.261	0.105	7.12256e-06	5	Glyma.09G065000
2.70709e-10	0.391396	0.304	0.129	7.40768e-06	5	Glyma.11G048300
2.74427e-10	0.37506	0.266	0.107	7.50941e-06	5	Glyma.10G200700
3.02792e-10	0.370429	0.217	0.081	8.28559e-06	5	Glyma.03G232600
3.54628e-10	0.386157	0.299	0.128	9.70405e-06	5	Glyma.06G260100
4.37001e-10	0.37446	0.272	0.112	1.19581e-05	5	Glyma.02G028700
5.33127e-10	-0.518493	0.25	0.456	1.45885e-05	5	Glyma.02G309500
6.29145e-10	0.452419	0.495	0.267	1.72159e-05	5	Glyma.06G137000
7.04798e-10	0.425523	0.489	0.285	1.92861e-05	5	Glyma.05G236300
7.233e-10	-0.534004	0.092	0.313	1.97924e-05	5	Glyma.04G065600
7.40403e-10	-0.538271	0.147	0.359	2.02604e-05	5	Glyma.11G061300
7.60359e-10	-0.539695	0.049	0.249	2.08065e-05	5	Glyma.13G160400
1.12523e-09	-0.565543	0.109	0.319	3.07908e-05	5	Glyma.05G168400
1.12985e-09	-0.499456	0.185	0.402	3.09172e-05	5	Glyma.08G274400
1.20046e-09	0.469973	0.386	0.214	3.28495e-05	5	Glyma.20G244900
1.27001e-09	-0.500858	0.255	0.46	3.47525e-05	5	Glyma.09G250800
1.38962e-09	-0.42449	0.402	0.582	3.80257e-05	5	Glyma.15G274900
1.63053e-09	0.323268	0.25	0.101	4.46178e-05	5	Glyma.01G086600
1.67033e-09	-0.505584	0.19	0.409	4.57068e-05	5	Glyma.19G186100
1.80416e-09	-0.52537	0.098	0.303	4.93691e-05	5	Glyma.06G055500
1.90845e-09	-0.466131	0.321	0.514	5.22227e-05	5	Glyma.01G115900
1.97807e-09	-0.513968	0.168	0.388	5.41278e-05	5	Glyma.16G145800
2.13062e-09	0.34307	0.201	0.074	5.83024e-05	5	Glyma.16G202400
2.84256e-09	-0.503936	0.223	0.421	7.77839e-05	5	Glyma.11G111400
2.87505e-09	0.329338	0.239	0.095	7.86728e-05	5	Glyma.05G197000
3.50768e-09	0.373319	0.332	0.154	9.59842e-05	5	Glyma.06G147100
3.5385e-09	-0.51814	0.049	0.239	9.68274e-05	5	Glyma.13G330400
4.45187e-09	-0.56249	0.065	0.255	0.000121821	5	Glyma.17G069100
4.63297e-09	-0.417987	0.402	0.582	0.000126777	5	Glyma.18G036400
4.83983e-09	0.356461	0.266	0.111	0.000132437	5	Glyma.05G184500
5.39062e-09	-0.515481	0.196	0.407	0.000147509	5	Glyma.15G194300
5.76633e-09	-0.496995	0.207	0.402	0.00015779	5	Glyma.03G060300
7.52937e-09	-0.493624	0.245	0.438	0.000206034	5	Glyma.04G156200
7.73759e-09	-0.43854	0.375	0.542	0.000211731	5	Glyma.09G154700
9.29879e-09	-0.438613	0.049	0.234	0.000254452	5	Glyma.02G202500
1.05373e-08	-0.449248	0.326	0.512	0.000288343	5	Glyma.08G173700
1.07663e-08	-0.430561	0.326	0.531	0.00029461	5	Glyma.06G295700
1.08645e-08	0.406727	0.527	0.354	0.000297297	5	Glyma.19G136400
1.23093e-08	0.358878	0.288	0.136	0.00033683	5	Glyma.08G047300
1.39715e-08	0.305498	0.25	0.107	0.000382316	5	Glyma.13G172000
1.77593e-08	0.352505	0.31	0.143	0.000485964	5	Glyma.13G265700
2.23551e-08	0.398505	0.37	0.208	0.000611724	5	Glyma.01G000900
2.27497e-08	-0.479365	0.196	0.389	0.000622524	5	Glyma.07G038500
2.72889e-08	-0.463827	0.098	0.291	0.000746733	5	Glyma.11G111100
3.15141e-08	0.38315	0.288	0.143	0.000862352	5	Glyma.01G096000
3.92094e-08	0.324838	0.201	0.081	0.00107293	5	Glyma.07G057400
4.35044e-08	-0.447928	0.239	0.429	0.00119046	5	Glyma.10G177200
4.41041e-08	0.320129	0.217	0.091	0.00120686	5	Glyma.14G007300
4.78587e-08	-0.476383	0.147	0.335	0.0013096	5	Glyma.18G057900
4.97693e-08	-0.422675	0.293	0.48	0.00136189	5	Glyma.02G047600
5.43589e-08	-0.406181	0.337	0.507	0.00148748	5	Glyma.03G114600
7.62638e-08	-0.434756	0.321	0.502	0.00208688	5	Glyma.08G264900
8.41395e-08	-0.457014	0.065	0.239	0.00230239	5	Glyma.20G150600
8.53586e-08	0.358856	0.31	0.162	0.00233575	5	Glyma.19G261200
1.05176e-07	-0.467928	0.152	0.332	0.00287804	5	Glyma.02G141700
1.16046e-07	0.302674	0.217	0.093	0.00317549	5	Glyma.09G151400
1.33128e-07	0.336747	0.353	0.181	0.00364291	5	Glyma.09G130400
1.36698e-07	0.308341	0.25	0.114	0.00374062	5	Glyma.06G262700
1.56156e-07	-0.450175	0.179	0.354	0.00427306	5	Glyma.08G180000
1.57568e-07	-0.431432	0.147	0.326	0.00431168	5	Glyma.03G262300
1.59581e-07	-0.445696	0.071	0.237	0.00436677	5	Glyma.06G089700
1.62404e-07	0.30999	0.272	0.13	0.00444402	5	Glyma.01G093902
1.87676e-07	-0.397061	0.277	0.461	0.00513556	5	Glyma.03G137000
2.03432e-07	0.302013	0.272	0.13	0.00556671	5	Glyma.04G064100
2.07088e-07	0.30861	0.245	0.113	0.00566676	5	Glyma.10G179500
2.10742e-07	-0.437306	0.304	0.461	0.00576674	5	Glyma.04G020300
2.15255e-07	0.332497	0.255	0.121	0.00589025	5	Glyma.06G226700
2.37521e-07	-0.423208	0.147	0.325	0.00649953	5	Glyma.07G047600
2.46897e-07	-0.457925	0.212	0.382	0.00675609	5	Glyma.15G253700
2.71674e-07	0.276495	0.201	0.085	0.00743409	5	Glyma.17G135500
2.80209e-07	-0.429457	0.234	0.408	0.00766764	5	Glyma.13G129400
2.87313e-07	-0.440865	0.179	0.36	0.00786203	5	Glyma.04G215800
2.88602e-07	-0.420876	0.212	0.391	0.00789731	5	Glyma.19G139300
2.92069e-07	-0.425774	0.223	0.409	0.00799218	5	Glyma.07G091400
3.6478e-07	0.329114	0.245	0.119	0.00998184	5	Glyma.20G072700
3.81005e-07	-0.433083	0.25	0.409	0.0104258	5	Glyma.04G167900
4.41638e-07	-0.294396	0.56	0.698	0.012085	5	Glyma.11G218300
4.5041e-07	0.328967	0.582	0.408	0.012325	5	Glyma.06G265000
4.51216e-07	0.349162	0.31	0.167	0.0123471	5	Glyma.17G215200
4.6508e-07	0.267786	0.228	0.102	0.0127265	5	Glyma.20G131500
4.88336e-07	-0.43268	0.092	0.252	0.0133628	5	Glyma.17G212200
6.02294e-07	0.305482	0.217	0.1	0.0164812	5	Glyma.16G215000
6.86668e-07	-0.428175	0.147	0.314	0.01879	5	Glyma.07G019700
7.36733e-07	-0.42893	0.163	0.326	0.02016	5	Glyma.12G219300
7.5374e-07	-0.421309	0.212	0.382	0.0206253	5	Glyma.16G007700
8.03472e-07	-0.426628	0.25	0.41	0.0219862	5	Glyma.04G112800
8.40774e-07	0.295562	0.228	0.105	0.0230069	5	Glyma.14G222700
8.63861e-07	0.300381	0.239	0.117	0.0236387	5	Glyma.19G037200
9.34706e-07	0.31207	0.266	0.133	0.0255773	5	Glyma.05G055100
9.54281e-07	-0.417667	0.114	0.273	0.026113	5	Glyma.19G161400
9.58292e-07	-0.424136	0.158	0.328	0.0262227	5	Glyma.01G006000
9.81865e-07	0.347365	0.299	0.158	0.0268677	5	Glyma.16G039800
1.12998e-06	-0.35231	0.38	0.525	0.0309207	5	Glyma.16G205200
1.14806e-06	0.32676	0.337	0.189	0.0314154	5	Glyma.12G236500
1.20267e-06	-0.42845	0.125	0.281	0.0329099	5	Glyma.12G092000
1.21098e-06	0.316785	0.223	0.108	0.0331374	5	Glyma.09G257900
1.41114e-06	-0.383953	0.082	0.242	0.0386144	5	Glyma.04G249700
1.43146e-06	-0.383247	0.098	0.257	0.0391703	5	Glyma.13G162800
1.51558e-06	-0.38684	0.12	0.287	0.0414724	5	Glyma.20G196900
1.57776e-06	-0.388658	0.06	0.208	0.0431739	5	Glyma.01G050100
1.61247e-06	-0.399681	0.168	0.332	0.0441237	5	Glyma.01G010200
1.6546e-06	-0.414008	0.152	0.314	0.0452765	5	Glyma.06G194900
1.72139e-06	-0.409063	0.141	0.303	0.0471041	5	Glyma.10G032200
1.73149e-06	0.292222	0.25	0.125	0.0473805	5	Glyma.14G001500
1.80105e-06	0.310554	0.217	0.103	0.0492841	5	Glyma.11G194600
1.89208e-06	-0.406192	0.168	0.325	0.0517749	5	Glyma.05G172300
1.99606e-06	-0.42402	0.12	0.276	0.0546201	5	Glyma.12G169600
2.02424e-06	0.351329	0.277	0.151	0.0553914	5	Glyma.07G207700
2.23501e-06	-0.410921	0.217	0.379	0.0611587	5	Glyma.05G092300
2.23633e-06	-0.379917	0.065	0.207	0.061195	5	Glyma.03G141200
2.29811e-06	-0.380597	0.092	0.248	0.0628856	5	Glyma.08G175900
2.42249e-06	0.256355	0.223	0.104	0.066289	5	Glyma.06G101600
2.43748e-06	0.344238	0.582	0.381	0.0666993	5	Glyma.10G169600
2.45221e-06	-0.36475	0.326	0.467	0.0671021	5	Glyma.16G044900
2.48101e-06	-0.363728	0.359	0.509	0.0678903	5	Glyma.06G223500
2.48243e-06	0.289545	0.245	0.123	0.0679291	5	Glyma.14G142100
2.48411e-06	0.296126	0.239	0.12	0.0679752	5	Glyma.10G130800
2.55494e-06	-0.341499	0.065	0.211	0.0699135	5	Glyma.20G082800
2.78643e-06	-0.390904	0.266	0.424	0.0762479	5	Glyma.10G249000
2.90215e-06	-0.365549	0.092	0.247	0.0794145	5	Glyma.04G161600
2.92587e-06	-0.397877	0.103	0.249	0.0800636	5	Glyma.11G226900
3.42993e-06	-0.390041	0.092	0.239	0.0938565	5	Glyma.03G246300
3.43871e-06	-0.380756	0.266	0.429	0.0940968	5	Glyma.06G150300
3.54744e-06	-0.355697	0.103	0.261	0.0970721	5	Glyma.20G243500
3.56531e-06	-0.391315	0.125	0.28	0.0975613	5	Glyma.15G052400
3.89621e-06	0.278983	0.217	0.104	0.106616	5	Glyma.15G268800
3.97457e-06	-0.3749	0.201	0.364	0.10876	5	Glyma.16G016100
4.00145e-06	0.287612	0.223	0.108	0.109496	5	Glyma.18G085400
4.36836e-06	0.239415	0.201	0.093	0.119536	5	Glyma.07G121900
4.67652e-06	-0.388636	0.147	0.297	0.127968	5	Glyma.18G116900
4.68838e-06	-0.277548	0.543	0.649	0.128293	5	Glyma.05G084525
4.90478e-06	0.303421	0.435	0.274	0.134214	5	Glyma.06G202500
5.36491e-06	0.301299	0.261	0.138	0.146805	5	Glyma.14G008700
5.48544e-06	-0.366792	0.245	0.404	0.150103	5	Glyma.13G210800
5.62134e-06	0.264041	0.223	0.11	0.153822	5	Glyma.10G168700
5.74861e-06	-0.394389	0.141	0.288	0.157305	5	Glyma.10G042100
6.00209e-06	-0.385295	0.196	0.35	0.164241	5	Glyma.02G249600
6.30789e-06	-0.370012	0.201	0.358	0.172609	5	Glyma.19G123800
6.40577e-06	-0.36003	0.12	0.274	0.175288	5	Glyma.08G304200
7.28906e-06	0.224076	0.207	0.097	0.199458	5	Glyma.06G268700
7.29378e-06	0.304519	0.326	0.189	0.199587	5	Glyma.10G107700
7.4991e-06	-0.376629	0.147	0.292	0.205206	5	Glyma.08G165500
7.63808e-06	-0.38174	0.174	0.324	0.209008	5	Glyma.15G275600
8.60348e-06	-0.351985	0.283	0.442	0.235426	5	Glyma.03G185900
8.85747e-06	-0.324733	0.092	0.237	0.242376	5	Glyma.07G201300
8.98428e-06	0.273683	0.228	0.116	0.245846	5	Glyma.14G098300
9.02201e-06	0.326053	0.397	0.268	0.246878	5	Glyma.18G129200
9.89437e-06	-0.341229	0.342	0.481	0.27075	5	Glyma.02G064700
1.01096e-05	-0.377076	0.141	0.286	0.27664	5	Glyma.14G086300
1.02276e-05	-0.359005	0.12	0.265	0.279869	5	Glyma.13G357300
1.11214e-05	-0.384389	0.109	0.247	0.304325	5	Glyma.17G073200
1.11804e-05	-0.397639	0.125	0.265	0.305941	5	Glyma.07G149600
1.19159e-05	0.292916	0.277	0.156	0.326067	5	Glyma.09G002100
1.38871e-05	-0.384799	0.114	0.248	0.380008	5	Glyma.11G160484
1.3901e-05	-0.358174	0.12	0.263	0.380388	5	Glyma.12G199400
1.46515e-05	-0.385827	0.158	0.287	0.400924	5	Glyma.09G087700
1.5654e-05	-0.395708	0.196	0.339	0.428356	5	Glyma.01G132500
1.63779e-05	0.265268	0.245	0.128	0.448164	5	Glyma.16G178500
1.69858e-05	0.2768	0.245	0.13	0.4648	5	Glyma.03G131000
1.80375e-05	-0.360333	0.239	0.388	0.493578	5	Glyma.13G282000
1.90362e-05	-0.34256	0.255	0.415	0.520907	5	Glyma.16G143600
2.18753e-05	0.272899	0.201	0.1	0.598595	5	Glyma.08G201300
2.24807e-05	-0.348285	0.283	0.441	0.615163	5	Glyma.18G226850
2.26626e-05	-0.356925	0.168	0.312	0.62014	5	Glyma.18G114900
2.50586e-05	0.246171	0.217	0.112	0.685702	5	Glyma.07G043900
2.58577e-05	0.321631	0.375	0.245	0.707571	5	Glyma.13G157300
3.02132e-05	-0.264493	0.527	0.655	0.826753	5	Glyma.09G133950
3.34762e-05	-0.348895	0.103	0.229	0.916042	5	Glyma.03G261500
3.44815e-05	-0.332185	0.201	0.347	0.943552	5	Glyma.15G102000
3.50457e-05	-0.327068	0.223	0.366	0.958991	5	Glyma.02G103900
3.61539e-05	0.259735	0.25	0.139	0.989315	5	Glyma.19G056700
3.95802e-05	-0.354763	0.185	0.317	1	5	Glyma.20G144700
3.98551e-05	-0.308058	0.109	0.246	1	5	Glyma.05G055500
4.22865e-05	-0.334423	0.147	0.285	1	5	Glyma.16G189500
4.25238e-05	-0.318209	0.098	0.227	1	5	Glyma.14G222500
4.30715e-05	-0.337775	0.098	0.225	1	5	Glyma.11G099300
4.47931e-05	-0.311143	0.087	0.214	1	5	Glyma.04G188700
4.48463e-05	0.249698	0.234	0.128	1	5	Glyma.16G141500
4.58174e-05	0.275092	0.315	0.192	1	5	Glyma.16G109200
4.71644e-05	0.29343	0.38	0.254	1	5	Glyma.13G027300
4.85803e-05	0.23482	0.228	0.121	1	5	Glyma.08G222200
4.93004e-05	0.237651	0.234	0.126	1	5	Glyma.12G071300
4.99443e-05	0.218532	0.239	0.126	1	5	Glyma.14G200200
5.2502e-05	0.297188	0.304	0.191	1	5	Glyma.13G072500
5.27357e-05	-0.325595	0.12	0.248	1	5	Glyma.06G067000
5.35507e-05	0.283216	0.255	0.147	1	5	Glyma.10G104900
6.46708e-05	0.277282	0.261	0.152	1	5	Glyma.10G105100
6.53879e-05	-0.359539	0.103	0.226	1	5	Glyma.08G199500
6.71815e-05	-0.326932	0.185	0.316	1	5	Glyma.08G175800
6.92244e-05	-0.31746	0.152	0.283	1	5	Glyma.15G003200
7.04868e-05	-0.318876	0.13	0.263	1	5	Glyma.08G204800
7.05538e-05	-0.354363	0.185	0.311	1	5	Glyma.15G174200
7.09388e-05	-0.294544	0.098	0.226	1	5	Glyma.01G038600
8.42802e-05	0.261661	0.239	0.136	1	5	Glyma.16G004800
[truncated: 2,663 more rows]

## Sheet: Supplemental Table S1B
Supplemental Table S1B. Cell type specific differentially expressed genes (DEGs) identified by snRNA-seq in this study. List of genes discovered by FindAllMarkers fucntion in seurat package. The clusters with cell type anntoation were used to compare gene expression between the nuclei from Si(-) and Si(+) samples. pct.1 (Si+) and pct.2 (Si-) are showing percentage of nuclei expressed correspondin…
p_val	avg_log2FC	pct.1	pct.2	p_val_adj	cluster	gene
0.000412794	0.348435	0.282	0.132	1	2	Glyma.14G008700		pct.1 = si(+)
3.39958e-06	0.379937	0.231	0.081	0.0930261	1	Glyma.15G015100		pct.2 = Si(-)
0.0285539	0.335412	0.259	0.109	1	6	Glyma.13G026901
0.0299109	0.330731	0.259	0.109	1	6	Glyma.10G298000
0.00172911	0.29557	0.328	0.178	1	2	Glyma.09G274000
0.0364407	0.450595	0.212	0.061	1	5	Glyma.11G085400
5.18046e-05	0.40399	0.312	0.161	1	1	Glyma.04G009400
5.14702e-07	0.387794	0.206	0.055	0.0140843	1	Glyma.12G022700
0.0393989	0.384722	0.212	0.061	1	5	Glyma.12G026600
0.046513	0.355709	0.212	0.061	1	5	Glyma.18G284300
0.000356654	0.425507	0.234	0.083	1	4	Glyma.17G250800
0.0126693	0.419965	0.224	0.073	1	6	Glyma.12G132400
0.014686	0.399082	0.224	0.073	1	6	Glyma.20G242400
0.0163791	0.391693	0.224	0.073	1	6	Glyma.08G101500
0.0169805	0.380662	0.224	0.073	1	6	Glyma.11G191100
0.00223582	0.362181	0.36	0.208	1	4	Glyma.06G202500
0.000176528	0.357442	0.264	0.112	1	2	Glyma.12G132400
0.0456528	0.431667	0.305	0.152	1	5	Glyma.08G233702
0.00045194	0.394493	0.243	0.09	1	4	Glyma.02G095400
0.0486879	0.386155	0.207	0.054	1	9	Glyma.02G012900
0.000134734	0.308518	0.307	0.154	1	1	Glyma.02G296400
1.49126e-05	0.434404	0.224	0.071	0.408069	2	Glyma.06G226700
2.37513e-05	0.409387	0.224	0.071	0.649932	2	Glyma.03G138200
0.00155699	0.319214	0.408	0.254	1	2	Glyma.10G221500
0.000224852	0.430695	0.216	0.062	1	4	Glyma.05G215900
0.0248348	0.388736	0.318	0.164	1	6	Glyma.01G074000
1.04713e-06	0.36952	0.216	0.062	0.0286536	1	Glyma.01G193600
0.0016171	0.337819	0.362	0.208	1	2	Glyma.17G250800
0.0393346	0.333172	0.318	0.164	1	6	Glyma.07G091800
0.00014976	0.36182	0.276	0.122	1	2	Glyma.04G134700
9.5878e-05	0.291213	0.23	0.076	1	2	Glyma.02G232600
0.0203828	0.410932	0.282	0.127	1	6	Glyma.20G054600
0.0213571	0.407473	0.282	0.127	1	6	Glyma.17G197700
0.0268604	0.373122	0.282	0.127	1	6	Glyma.20G227200
0.000343156	0.3205	0.282	0.127	1	2	Glyma.09G207200
0.0111566	0.510183	0.212	0.057	1	7	Glyma.12G091900
0.0111566	0.495331	0.212	0.057	1	7	Glyma.17G188300
0.0111566	0.474157	0.212	0.057	1	7	Glyma.09G182600
0.0144662	0.456101	0.212	0.057	1	7	Glyma.15G098100
0.0129543	0.412911	0.212	0.057	1	7	Glyma.04G064100
6.26751e-05	0.367373	0.241	0.086	1	2	Glyma.06G050600
3.76006e-06	0.40615	0.201	0.046	0.10289	2	Glyma.16G213700
0.000159303	0.370899	0.882	0.727	1	6	Glyma.14G109700
0.000910684	0.410293	0.288	0.132	1	4	Glyma.07G077700
0.000148162	0.345808	0.427	0.271	1	1	Glyma.07G077700
0.0173724	0.478674	0.242	0.086	1	7	Glyma.12G142900
0.0159891	0.429379	0.247	0.091	1	6	Glyma.01G006200
0.0180236	0.421608	0.247	0.091	1	6	Glyma.15G071300
0.0139136	0.414569	0.247	0.091	1	6	Glyma.03G138200
2.14095e-05	0.413863	0.317	0.161	0.585849	1	Glyma.12G079500
5.16054e-06	0.412348	0.207	0.051	0.141213	2	Glyma.13G069800
0.0253281	0.408522	0.242	0.086	1	7	Glyma.12G130000
2.42872e-07	0.377463	0.211	0.055	0.00664596	1	Glyma.18G287900
0.0227821	0.365805	0.247	0.091	1	6	Glyma.13G329600
6.13388e-06	0.35853	0.207	0.051	0.167848	2	Glyma.02G114100
8.88457e-07	0.44792	0.241	0.084	0.0243117	1	Glyma.06G140600
1.62525e-05	0.469111	0.216	0.059	0.444734	3	Glyma.07G093700
0.00961394	0.430766	0.212	0.055	1	6	Glyma.04G076000
0.00980744	0.421835	0.212	0.055	1	6	Glyma.08G293100
0.000553012	0.413451	0.324	0.167	1	4	Glyma.12G155900
0.012415	0.397351	0.212	0.055	1	6	Glyma.13G156500
0.0117112	0.391857	0.212	0.055	1	6	Glyma.15G015100
0.0126578	0.376892	0.212	0.055	1	6	Glyma.17G119000
6.28192e-06	0.361525	0.256	0.099	0.171898	1	Glyma.02G165800
0.013156	0.324577	0.212	0.055	1	6	Glyma.11G159230
0.0145808	0.294035	0.812	0.655	1	6	Glyma.20G058901
7.82048e-05	0.377893	0.207	0.049	1	4	Glyma.13G213200
0.000634134	0.357572	0.351	0.193	1	2	Glyma.08G328800
0.00139055	0.319888	0.483	0.325	1	2	Glyma.12G232300
0.0280272	0.424377	0.219	0.061	1	5	Glyma.08G152600
1.70902e-06	0.416447	0.246	0.088	0.0467657	1	Glyma.02G288600
0.0430681	0.406206	0.219	0.061	1	5	Glyma.08G068200
0.0307706	0.404673	0.219	0.061	1	5	Glyma.16G150400
0.0364799	0.390798	0.219	0.061	1	5	Glyma.05G180100
0.0414646	0.383496	0.219	0.061	1	5	Glyma.02G150200
0.0394055	0.382868	0.219	0.061	1	5	Glyma.15G251500
0.000233939	0.459996	0.234	0.076	1	4	Glyma.06G259400
3.15205e-06	0.397676	0.261	0.103	0.0862528	1	Glyma.03G052800
0.00246191	0.283098	0.397	0.239	1	2	Glyma.09G054200
1.91259e-05	0.474359	0.227	0.068	0.523362	3	Glyma.18G281700
0.0466248	0.422228	0.311	0.152	1	5	Glyma.12G224000
1.76477e-06	0.405742	0.251	0.092	0.0482913	1	Glyma.03G131000
0.024667	0.467524	0.273	0.114	1	7	Glyma.12G232500
0.0291846	0.433212	0.273	0.114	1	7	Glyma.18G123800
1.05452e-05	0.410213	0.23	0.071	0.288559	2	Glyma.07G095900
9.69499e-05	0.381631	0.276	0.117	1	2	Glyma.14G139800
2.5529e-05	0.367308	0.503	0.344	0.698575	1	Glyma.18G043600
1.41411e-05	0.431945	0.236	0.076	0.386958	2	Glyma.14G124300
9.20762e-05	0.391697	0.282	0.122	1	2	Glyma.06G265100
6.1768e-05	0.469354	0.247	0.087	1	3	Glyma.14G032000
0.0288652	0.462018	0.303	0.143	1	7	Glyma.15G105100
9.79756e-08	0.441207	0.211	0.051	0.002681	1	Glyma.10G002200
6.94844e-08	0.423809	0.211	0.051	0.00190137	1	Glyma.06G102000
8.85922e-08	0.38802	0.211	0.051	0.00242424	1	Glyma.08G004400
0.00124953	0.409477	0.396	0.236	1	4	Glyma.17G128200
0.0315833	0.435067	0.252	0.091	1	5	Glyma.07G070700
6.30586e-05	0.388662	0.392	0.231	1	1	Glyma.07G222000
0.0285841	0.376614	0.306	0.145	1	6	Glyma.19G192800
5.38298e-06	0.394935	0.271	0.11	0.1473	1	Glyma.18G067500
0.00641432	0.501014	0.235	0.073	1	6	Glyma.01G044100
0.0105618	0.446372	0.235	0.073	1	6	Glyma.08G291000
2.93405e-08	0.419867	0.206	0.044	0.000802874	1	Glyma.18G033500
0.00979843	0.417054	0.235	0.073	1	6	Glyma.05G101700
0.0118062	0.387431	0.235	0.073	1	6	Glyma.10G143900
0.000162966	0.458811	0.252	0.09	1	4	Glyma.05G068400
3.37329e-06	0.399742	0.213	0.051	0.0923067	2	Glyma.16G079200
3.82999e-05	0.385841	0.382	0.22	1	1	Glyma.13G352900
1.15816e-07	0.384667	0.221	0.059	0.0031692	1	Glyma.15G091600
2.11734e-05	0.459507	1	0.838	0.579388	9	Glyma.16G071500
3.22537e-06	0.421728	0.276	0.114	0.088259	1	Glyma.13G261200
1.87401e-06	0.408716	0.766	0.604	0.0512805	4	Glyma.17G226500
0.0194164	0.383189	0.271	0.109	1	6	Glyma.13G174600
2.22575e-05	0.410798	0.412	0.249	0.609053	1	Glyma.17G073200
3.92887e-05	0.370523	0.357	0.194	1	1	Glyma.20G170000
0.00246439	0.355531	0.441	0.278	1	4	Glyma.12G014400
8.63092e-05	0.464436	0.225	0.062	1	4	Glyma.15G105100
3.41878e-05	0.343408	0.317	0.154	0.935516	1	Glyma.06G258900
0.000231761	0.340183	0.305	0.142	1	2	Glyma.20G071200
0.00579185	0.449377	0.2	0.036	1	6	Glyma.04G228300
8.83164e-06	0.423071	0.23	0.066	0.241669	2	Glyma.10G291400
0.0333235	0.42279	0.225	0.061	1	5	Glyma.14G125200
9.80514e-07	0.399199	0.256	0.092	0.0268308	1	Glyma.14G139800
0.00645936	0.39764	0.2	0.036	1	6	Glyma.06G292200
0.00704236	0.395689	0.2	0.036	1	6	Glyma.14G124300
0.00605101	0.395004	0.2	0.036	1	6	Glyma.06G262700
6.45464e-06	0.394523	0.23	0.066	0.176625	2	Glyma.14G151100
0.00704236	0.383768	0.2	0.036	1	6	Glyma.17G202700
0.0334762	0.364748	0.4	0.236	1	6	Glyma.03G057800
0.0108438	0.474895	0.365	0.2	1	6	Glyma.08G213000
0.022035	0.442182	0.365	0.2	1	6	Glyma.06G247100
4.48064e-06	0.419176	0.286	0.121	0.122608	1	Glyma.12G170500
0.0289264	0.358647	0.365	0.2	1	6	Glyma.06G265100
0.0141006	0.585289	0.394	0.229	1	7	Glyma.09G274000
1.65157e-07	0.423805	0.231	0.066	0.00451935	1	Glyma.15G076500
0.0361245	0.321372	0.329	0.164	1	6	Glyma.16G102300
0.00544557	0.51725	0.636	0.471	1	7	Glyma.16G089000
0.0239001	0.401083	0.529	0.364	1	6	Glyma.10G169600
0.000590176	0.456841	0.36	0.194	1	4	Glyma.07G004300
1.7769e-07	0.432204	0.236	0.07	0.0048623	1	Glyma.03G232700
4.80583e-08	0.445336	0.221	0.055	0.00131507	1	Glyma.17G126500
8.8695e-06	0.413039	0.397	0.231	0.242705	1	Glyma.04G076000
0.000512439	0.317904	0.328	0.162	1	2	Glyma.10G048100
0.000414089	0.386529	0.27	0.104	1	4	Glyma.15G098100
6.24947e-05	0.598345	0.299	0.132	1	3	Glyma.14G109700
0.0211439	0.478988	0.424	0.257	1	7	Glyma.16G049000
0.0122065	0.441799	0.294	0.127	1	6	Glyma.06G173500
0.0163195	0.423678	0.294	0.127	1	6	Glyma.12G236500
0.000164294	0.326453	0.427	0.26	1	1	Glyma.15G046600
0.0265241	0.475131	0.258	0.091	1	5	Glyma.08G094500
1.62717e-06	0.446091	0.218	0.051	0.0445258	2	Glyma.10G179500
0.0356711	0.430002	0.258	0.091	1	5	Glyma.04G192300
1.3447e-08	0.472087	0.216	0.048	0.000367963	1	Glyma.06G147100
2.29474e-05	0.375625	0.362	0.194	0.627933	1	Glyma.01G086201
0.000627203	0.329003	0.351	0.183	1	2	Glyma.06G261500
0.00815115	0.437107	0.259	0.091	1	6	Glyma.10G037300
0.0118821	0.436677	0.259	0.091	1	6	Glyma.14G085800
0.0166291	0.415397	0.259	0.091	1	6	Glyma.11G061100
3.26371e-05	0.350007	0.259	0.091	0.893082	2	Glyma.04G050000
4.14541e-05	0.319495	0.747	0.579	1	2	Glyma.13G012200
0.00469655	0.598978	0.212	0.043	1	7	Glyma.18G195200
1.13657e-05	0.511166	0.237	0.068	0.311012	3	Glyma.09G274000
0.00533843	0.499062	0.212	0.043	1	7	Glyma.02G216800
4.52388e-09	0.461811	0.206	0.037	0.000123791	1	Glyma.08G339600
0.00511616	0.455634	0.212	0.043	1	7	Glyma.16G012600
0.0366007	0.429238	0.351	0.182	1	5	Glyma.12G073900
0.0058093	0.424131	0.212	0.043	1	7	Glyma.04G134700
0.0063173	0.380576	0.212	0.043	1	7	Glyma.03G066800
3.38985e-05	0.367092	0.407	0.238	0.927599	1	Glyma.10G221500
2.96783e-06	0.45166	0.23	0.061	0.0812116	2	Glyma.13G265800
3.51144e-07	0.444815	0.261	0.092	0.0096087	1	Glyma.20G131500
2.37192e-06	0.416572	0.23	0.061	0.0649053	2	Glyma.18G123800
0.0069121	0.412441	0.224	0.055	1	6	Glyma.08G220500
0.00988559	0.379517	0.224	0.055	1	6	Glyma.11G215500
0.0266129	0.493028	0.291	0.121	1	5	Glyma.11G207000
8.19476e-06	0.418879	0.241	0.071	0.224241	2	Glyma.15G105100
5.27646e-06	0.412888	0.241	0.071	0.144385	2	Glyma.01G096000
0.0452622	0.393811	0.291	0.121	1	5	Glyma.09G065000
8.19826e-05	0.37756	0.287	0.117	1	2	Glyma.11G048300
0.00785658	0.599195	0.242	0.071	1	7	Glyma.20G237200
0.00844669	0.560518	0.242	0.071	1	7	Glyma.07G053300
0.00907613	0.555375	0.242	0.071	1	7	Glyma.09G069800
2.14876e-07	0.49867	0.207	0.036	0.00587987	2	Glyma.16G210600
0.010462	0.452247	0.242	0.071	1	7	Glyma.05G101700
3.32629e-05	0.434991	0.293	0.122	0.910205	2	Glyma.15G015100
3.12028e-06	0.393611	0.296	0.125	0.0853834	1	Glyma.16G150400
1.23583e-07	0.480501	0.201	0.03	0.00338174	2	Glyma.04G121000
0.0187687	0.467845	0.232	0.061	1	5	Glyma.17G135500
0.0201081	0.462397	0.232	0.061	1	5	Glyma.09G256000
1.60584e-07	0.453243	0.201	0.03	0.00439422	2	Glyma.15G171000
0.000624029	0.411398	0.324	0.153	1	4	Glyma.18G109100
0.0324526	0.353494	0.232	0.061	1	5	Glyma.07G121900
0.0359439	0.338959	0.232	0.061	1	5	Glyma.13G130000
1.88695e-05	0.390783	0.457	0.286	0.516344	1	Glyma.13G157300
6.20107e-09	0.473285	0.216	0.044	0.000169686	1	Glyma.02G114100
8.95294e-06	0.465692	0.207	0.035	0.244988	4	Glyma.01G044100
0.000381274	0.438215	0.36	0.188	1	4	Glyma.07G133500
1.25126e-05	0.434113	0.207	0.035	0.342396	4	Glyma.11G215500
5.23047e-05	0.466532	0.234	0.062	1	4	Glyma.08G339500
0.000286371	0.322111	0.538	0.366	1	1	Glyma.11G148362
4.8189e-06	0.52152	0.237	0.064	0.131864	3	Glyma.17G128200
0.0104782	0.445653	0.282	0.109	1	6	Glyma.06G050600
0.0130523	0.412268	0.282	0.109	1	6	Glyma.04G104900
0.0169769	0.396782	0.282	0.109	1	6	Glyma.09G002100
0.0153979	0.370024	0.282	0.109	1	6	Glyma.14G151100
0.0193189	0.616996	0.2	0.027	1	8	Glyma.08G031900
0.0205818	0.586671	0.2	0.027	1	8	Glyma.17G138900
0.0205818	0.548707	0.2	0.027	1	8	Glyma.05G224200
0.00984418	0.530673	0.318	0.145	1	6	Glyma.03G053500
0.0205818	0.513739	0.2	0.027	1	8	Glyma.18G029300
0.0193189	0.498311	0.2	0.027	1	8	Glyma.17G214900
0.0193189	0.489343	0.2	0.027	1	8	Glyma.06G003600
0.021916	0.487823	0.2	0.027	1	8	Glyma.10G028800
0.021916	0.477323	0.2	0.027	1	8	Glyma.02G232600
0.0193189	0.460799	0.2	0.027	1	8	Glyma.06G147100
0.0248117	0.458656	0.2	0.027	1	8	Glyma.03G172900
0.0233249	0.454675	0.2	0.027	1	8	Glyma.13G047900
0.0327995	0.446284	0.325	0.152	1	5	Glyma.10G221500
0.0193189	0.436482	0.2	0.027	1	8	Glyma.06G042400
0.0205818	0.433376	0.2	0.027	1	8	Glyma.13G346400
0.0280331	0.415973	0.2	0.027	1	8	Glyma.02G146900
0.0248117	0.413484	0.2	0.027	1	8	Glyma.07G095000
0.021916	0.406898	0.2	0.027	1	8	Glyma.16G217700
0.0233249	0.394196	0.2	0.027	1	8	Glyma.15G219300
0.021916	0.38737	0.2	0.027	1	8	Glyma.12G190800
0.0248117	0.38584	0.2	0.027	1	8	Glyma.16G213700
0.0193189	0.380517	0.2	0.027	1	8	Glyma.17G010600
0.0227124	0.378472	0.318	0.145	1	6	Glyma.13G054800
0.02638	0.363002	0.2	0.027	1	8	Glyma.09G068000
0.0193189	0.348276	0.2	0.027	1	8	Glyma.02G226900
0.0248117	0.338953	0.2	0.027	1	8	Glyma.14G032000
0.0399969	0.320601	0.318	0.145	1	6	Glyma.04G249400
0.0353537	0.317446	0.318	0.145	1	6	Glyma.09G054200
0.0193189	0.316484	0.2	0.027	1	8	Glyma.09G137000
0.0399969	0.307584	0.318	0.145	1	6	Glyma.07G070700
0.0280683	0.373671	0.518	0.345	1	6	Glyma.01G061500
5.69699e-06	0.54673	0.247	0.073	0.155893	3	Glyma.05G046000
1.94016e-09	0.472015	0.211	0.037	5.30906e-05	1	Glyma.05G197000
1.86616e-07	0.463387	0.206	0.032	0.00510656	3	Glyma.17G165200
3.73488e-08	0.443387	0.236	0.062	0.00102201	1	Glyma.16G210600
0.00799951	0.442653	0.247	0.073	1	6	Glyma.06G267400
0.00648122	0.438871	0.247	0.073	1	6	Glyma.09G117100
1.33768e-05	0.428602	0.216	0.042	0.366043	4	Glyma.01G132000
4.71731e-06	0.40042	0.302	0.128	0.129084	1	Glyma.15G065600
4.14631e-05	0.355409	0.482	0.308	1	1	Glyma.12G155900
0.0282315	0.46146	0.265	0.091	1	5	Glyma.12G091900
1.22622e-06	0.452487	0.23	0.056	0.0335543	2	Glyma.06G101600
5.88223e-06	0.374173	0.317	0.143	0.160961	1	Glyma.07G070700
0.0196778	0.472986	0.205	0.03	1	5	Glyma.13G091000
1.68199e-06	0.451755	0.241	0.066	0.046026	2	Glyma.13G156500
1.57629e-05	0.437728	0.287	0.112	0.431337	2	Glyma.08G321400
0.0211597	0.396764	0.205	0.03	1	5	Glyma.18G275200
0.000282151	0.418502	0.279	0.104	1	4	Glyma.13G264400
8.24935e-07	0.38229	0.793	0.618	0.0225735	4	Glyma.13G012200
0.00780701	0.415553	0.576	0.4	1	6	Glyma.03G136000
7.63406e-06	0.623153	0.258	0.082	0.208898	3	Glyma.17G188300
0.00408753	0.470679	0.212	0.036	1	6	Glyma.06G025200
0.0402896	0.413787	0.358	0.182	1	5	Glyma.02G014000
0.00417913	0.371821	0.212	0.036	1	6	Glyma.02G181500
0.0119934	0.37069	0.612	0.436	1	6	Glyma.17G226500
0.000214288	0.361379	0.511	0.335	1	2	Glyma.13G027800
0.0104997	0.626405	0.333	0.157	1	7	Glyma.07G039600
4.26065e-07	0.426347	0.271	0.095	0.0116588	1	Glyma.08G234200
0.00014199	0.379805	0.345	0.168	1	2	Glyma.01G086201
2.02465e-06	0.499951	0.227	0.05	0.0554026	3	Glyma.11G215500
0.0313825	0.434532	0.298	0.121	1	5	Glyma.11G190900
0.0288565	0.369098	0.238	0.061	1	5	Glyma.17G197700
0.0315758	0.365495	0.238	0.061	1	5	Glyma.17G104100
0.0101231	0.445152	0.341	0.164	1	6	Glyma.02G282300
0.0175272	0.377074	0.341	0.164	1	6	Glyma.03G247100
3.73924e-06	0.435706	0.259	0.081	0.102321	2	Glyma.04G064100
7.27057e-05	0.412759	0.261	0.083	1	4	Glyma.08G190700
1.06797e-05	0.402049	0.427	0.249	0.292238	1	Glyma.12G073900
2.10255e-05	0.436201	0.234	0.056	0.575341	4	Glyma.08G291000
3.22147e-06	0.41523	0.347	0.168	0.0881523	1	Glyma.14G217200
0.0116284	0.435585	0.306	0.127	1	6	Glyma.18G078600
0.0300217	0.512196	0.233	0.054	1	8	Glyma.03G205900
0.0316716	0.503032	0.233	0.054	1	8	Glyma.02G252500
0.0284463	0.494751	0.233	0.054	1	8	Glyma.10G164800
0.0284463	0.492073	0.233	0.054	1	8	Glyma.06G137000
0.0316716	0.482583	0.233	0.054	1	8	Glyma.04G242800
0.0269426	0.468193	0.233	0.054	1	8	Glyma.07G015800
0.0255662	0.447565	0.391	0.212	1	5	Glyma.20G071200
8.41796e-07	0.435107	0.23	0.051	0.0230349	2	Glyma.18G096400
7.05865e-07	0.433105	0.23	0.051	0.0193153	2	Glyma.11G150452
0.0316716	0.412328	0.233	0.054	1	8	Glyma.16G079200
0.0370954	0.377372	0.233	0.054	1	8	Glyma.17G243100
0.0411349	0.350073	0.233	0.054	1	8	Glyma.07G189100
0.0390708	0.343144	0.233	0.054	1	8	Glyma.07G000400
0.0411349	0.321703	0.233	0.054	1	8	Glyma.02G105600
0.0432906	0.312588	0.233	0.054	1	8	Glyma.08G283400
3.24564e-07	0.499208	0.236	0.056	0.00888137	2	Glyma.06G293400
0.0178409	0.498665	0.207	0.027	1	9	Glyma.03G052800
0.0178409	0.496531	0.207	0.027	1	9	Glyma.02G146900
0.0203107	0.487537	0.207	0.027	1	9	Glyma.15G115600
0.00361982	0.474197	0.235	0.055	1	6	Glyma.08G021900
0.0190408	0.456133	0.207	0.027	1	9	Glyma.04G175300
0.0178409	0.443533	0.207	0.027	1	9	Glyma.15G071300
0.0190408	0.439071	0.207	0.027	1	9	Glyma.15G213200
0.0203107	0.437379	0.207	0.027	1	9	Glyma.19G242300
0.0178409	0.434998	0.207	0.027	1	9	Glyma.16G176900
0.0178409	0.433729	0.207	0.027	1	9	Glyma.05G240200
0.0203107	0.428299	0.207	0.027	1	9	Glyma.13G311600
0.0190408	0.427349	0.207	0.027	1	9	Glyma.08G220000
0.0190408	0.424147	0.207	0.027	1	9	Glyma.07G037100
0.0230736	0.422829	0.207	0.027	1	9	Glyma.15G227500
0.023397	0.422237	0.435	0.255	1	6	Glyma.02G158200
0.0216538	0.420079	0.207	0.027	1	9	Glyma.18G197600
0.0230736	0.413318	0.207	0.027	1	9	Glyma.11G082300
0.0216538	0.413142	0.207	0.027	1	9	Glyma.10G120300
0.0190408	0.412706	0.207	0.027	1	9	Glyma.08G087600
0.0178409	0.405934	0.207	0.027	1	9	Glyma.08G111100
0.0167078	0.399947	0.207	0.027	1	9	Glyma.17G146600
6.81149e-05	0.398209	0.368	0.188	1	2	Glyma.04G012700
0.0201356	0.398175	0.435	0.255	1	6	Glyma.14G155900
0.0216538	0.396532	0.207	0.027	1	9	Glyma.07G270800
0.0203107	0.392204	0.207	0.027	1	9	Glyma.15G000300
0.0178409	0.391504	0.207	0.027	1	9	Glyma.16G169500
0.0230736	0.390924	0.207	0.027	1	9	Glyma.13G032300
0.0216538	0.387646	0.207	0.027	1	9	Glyma.10G018700
0.0203107	0.380998	0.207	0.027	1	9	Glyma.08G071900
0.0230736	0.379423	0.207	0.027	1	9	Glyma.07G007000
0.0216538	0.37812	0.207	0.027	1	9	Glyma.15G132800
0.0203107	0.375336	0.207	0.027	1	9	Glyma.02G144500
0.0190408	0.373226	0.207	0.027	1	9	Glyma.01G175100
0.0278267	0.367416	0.471	0.291	1	6	Glyma.11G154700
0.0190408	0.367223	0.207	0.027	1	9	Glyma.08G293900
0.0216538	0.363377	0.207	0.027	1	9	Glyma.08G026500
0.0216538	0.360373	0.207	0.027	1	9	Glyma.01G168900
0.0216538	0.349754	0.207	0.027	1	9	Glyma.10G230000
0.0216538	0.345987	0.207	0.027	1	9	Glyma.01G169000
0.00770209	0.345122	0.235	0.055	1	6	Glyma.06G157400
0.0245735	0.341987	0.207	0.027	1	9	Glyma.12G198200
0.0203107	0.336982	0.207	0.027	1	9	Glyma.07G073800
0.0245735	0.332141	0.207	0.027	1	9	Glyma.16G069200
0.0245735	0.326873	0.207	0.027	1	9	Glyma.13G069000
0.0230736	0.326159	0.207	0.027	1	9	Glyma.08G173500
0.0203107	0.325743	0.207	0.027	1	9	Glyma.17G211000
0.0230736	0.320488	0.207	0.027	1	9	Glyma.02G058800
0.0216538	0.32037	0.207	0.027	1	9	Glyma.01G175700
0.0203107	0.319351	0.207	0.027	1	9	Glyma.17G249900
0.0245735	0.318555	0.207	0.027	1	9	Glyma.17G067800
0.0230736	0.314988	0.207	0.027	1	9	Glyma.10G120400
0.0216538	0.30491	0.207	0.027	1	9	Glyma.05G209100
0.0245735	0.304614	0.207	0.027	1	9	Glyma.10G102900
0.0245735	0.269965	0.207	0.027	1	9	Glyma.13G217600
0.0133761	0.36181	0.271	0.091	1	6	Glyma.03G194000
4.97985e-07	0.505184	0.227	0.046	0.0136269	3	Glyma.07G039600
5.82439e-06	0.482951	0.216	0.035	0.159379	4	Glyma.06G262400
7.80252e-06	0.424954	0.216	0.035	0.213508	4	Glyma.02G028700
8.76138e-06	0.42412	0.216	0.035	0.239746	4	Glyma.08G339400
0.0163042	0.599386	0.272	0.091	1	5	Glyma.19G113400
0.0219579	0.487555	0.272	0.091	1	5	Glyma.16G008600
4.59651e-07	0.701402	0.237	0.055	0.0125779	3	Glyma.18G195200
0.0121269	0.500029	0.212	0.03	1	5	Glyma.19G254800
0.015661	0.482008	0.212	0.03	1	5	Glyma.17G180100
6.62672e-08	0.477592	0.218	0.036	0.00181334	2	Glyma.19G054700
0.0119431	0.475036	0.212	0.03	1	5	Glyma.15G272000
0.0415653	0.441417	0.364	0.182	1	5	Glyma.18G155400
0.00206191	0.494452	0.2	0.018	1	6	Glyma.10G212300
0.00152859	0.488352	0.2	0.018	1	6	Glyma.18G241800
0.00156763	0.481837	0.2	0.018	1	6	Glyma.15G003300
0.00201161	0.475596	0.2	0.018	1	6	Glyma.01G086600
0.00156763	0.46896	0.2	0.018	1	6	Glyma.11G207300
0.00186764	0.468746	0.2	0.018	1	6	Glyma.18G199000
0.00186764	0.455846	0.2	0.018	1	6	Glyma.15G171000
0.00211329	0.432835	0.2	0.018	1	6	Glyma.10G219600
0.01369	0.415483	0.4	0.218	1	6	Glyma.11G208700
0.00211329	0.408375	0.2	0.018	1	6	Glyma.06G175100
0.00187412	0.546066	0.212	0.029	1	7	Glyma.18G244100
0.00161726	0.479772	0.212	0.029	1	7	Glyma.08G220000
1.67132e-09	0.468946	0.231	0.048	4.57341e-05	1	Glyma.01G096000
2.35807e-09	0.465209	0.231	0.048	6.45261e-05	1	Glyma.05G103600
7.61146e-06	0.464102	0.225	0.042	0.20828	4	Glyma.16G204400
1.60358e-06	0.455167	0.259	0.076	0.0438803	2	Glyma.07G039600
3.63864e-06	0.438855	0.264	0.081	0.0995678	2	Glyma.02G288600
4.67877e-06	0.415506	0.432	0.249	0.12803	1	Glyma.18G281700
0.00161726	0.406495	0.212	0.029	1	7	Glyma.20G053400
3.82863e-05	0.333664	0.553	0.37	1	1	Glyma.13G027800
1.76855e-06	0.50237	0.622	0.438	0.0483945	4	Glyma.08G328800
1.83088e-07	0.486679	0.23	0.046	0.00501002	2	Glyma.08G072200
0.0196662	0.466538	0.245	0.061	1	5	Glyma.18G123800
0.000270815	0.439187	0.441	0.257	1	4	Glyma.18G200500
0.000404728	0.430816	0.441	0.257	1	4	Glyma.17G104800
0.0280682	0.407914	0.245	0.061	1	5	Glyma.09G049700
1.33562e-05	0.557464	0.299	0.114	0.36548	3	Glyma.08G328800
3.207e-06	0.540548	0.258	0.073	0.0877563	3	Glyma.17G239000
5.7012e-11	0.519489	0.211	0.026	1.56008e-06	1	Glyma.09G115100
2.49957e-08	0.482577	0.266	0.081	0.000683983	1	Glyma.14G223400
5.01171e-07	0.447616	0.241	0.056	0.013714	2	Glyma.07G057400
0.00838193	0.443607	0.294	0.109	1	6	Glyma.15G215100
1.83179e-05	0.419915	0.322	0.137	0.50125	2	Glyma.14G155900
7.16795e-06	0.398149	0.467	0.282	0.196144	1	Glyma.17G128200
0.0252235	0.596365	0.267	0.081	1	8	Glyma.11G253900
3.28859e-07	0.565962	0.247	0.061	0.00899891	2	Glyma.01G153300
0.0392027	0.548226	0.267	0.081	1	8	Glyma.20G021500
0.0356283	0.53049	0.267	0.081	1	8	Glyma.08G107300
5.90485e-05	0.515713	0.36	0.174	1	4	Glyma.02G100000
0.00408533	0.50178	0.259	0.073	1	6	Glyma.16G109200
0.0307897	0.483316	0.267	0.081	1	8	Glyma.09G182600
0.00689942	0.440062	0.259	0.073	1	6	Glyma.17G250200
0.000392958	0.435646	0.387	0.201	1	4	Glyma.06G265100
0.00469181	0.431929	0.259	0.073	1	6	Glyma.19G263600
0.0451326	0.412559	0.267	0.081	1	8	Glyma.10G192400
0.0472702	0.412387	0.267	0.081	1	8	Glyma.06G037600
0.0451326	0.402452	0.267	0.081	1	8	Glyma.13G111500
0.0494924	0.357204	0.267	0.081	1	8	Glyma.08G086100
0.0430771	0.356324	0.267	0.081	1	8	Glyma.12G029500
0.025868	0.460595	0.338	0.152	1	5	Glyma.13G072500
0.0273812	0.460409	0.338	0.152	1	5	Glyma.15G156400
0.0385728	0.40465	0.338	0.152	1	5	Glyma.11G256800
9.55916e-08	0.475735	0.286	0.099	0.00261577	1	Glyma.18G298500
0.0271751	0.463161	0.241	0.054	1	9	Glyma.06G142000
0.0271751	0.450932	0.241	0.054	1	9	Glyma.08G220200
5.42434e-05	0.446833	0.27	0.083	1	4	Glyma.19G232400
0.0271751	0.433584	0.241	0.054	1	9	Glyma.17G235600
0.032031	0.432389	0.241	0.054	1	9	Glyma.20G189900
0.0287179	0.417419	0.241	0.054	1	9	Glyma.09G105300
0.0229681	0.417378	0.241	0.054	1	9	Glyma.04G086000
0.0287179	0.415679	0.241	0.054	1	9	Glyma.10G208900
0.0229681	0.407555	0.241	0.054	1	9	Glyma.13G303800
0.0303356	0.40575	0.241	0.054	1	9	Glyma.19G028100
0.0303356	0.401818	0.241	0.054	1	9	Glyma.06G060551
0.032031	0.394361	0.241	0.054	1	9	Glyma.11G000800
0.0287179	0.390797	0.241	0.054	1	9	Glyma.09G052200
0.0303356	0.388783	0.241	0.054	1	9	Glyma.06G254000
0.0303356	0.385361	0.241	0.054	1	9	Glyma.08G135200
0.033807	0.384651	0.241	0.054	1	9	Glyma.01G153300
0.032031	0.38198	0.241	0.054	1	9	Glyma.20G020200
0.033807	0.376775	0.241	0.054	1	9	Glyma.04G175900
0.0303356	0.372971	0.241	0.054	1	9	Glyma.09G114700
0.0271751	0.36779	0.241	0.054	1	9	Glyma.09G088300
0.032031	0.365657	0.241	0.054	1	9	Glyma.18G095400
0.0257043	0.361276	0.241	0.054	1	9	Glyma.17G121200
0.032031	0.350989	0.241	0.054	1	9	Glyma.20G070800
0.0417765	0.35018	0.241	0.054	1	9	Glyma.09G181400
0.0271751	0.349679	0.241	0.054	1	9	Glyma.06G164500
0.032031	0.345742	0.241	0.054	1	9	Glyma.20G082450
0.0396481	0.340482	0.241	0.054	1	9	Glyma.08G348300
0.0356664	0.333305	0.241	0.054	1	9	Glyma.02G177300
0.0376125	0.329442	0.241	0.054	1	9	Glyma.01G077300
0.033807	0.329249	0.241	0.054	1	9	Glyma.02G066700
0.033807	0.324381	0.241	0.054	1	9	Glyma.05G143100
0.0376125	0.317036	0.241	0.054	1	9	Glyma.20G242400
0.0376125	0.316912	0.241	0.054	1	9	Glyma.02G137700
0.0376125	0.310188	0.241	0.054	1	9	Glyma.12G237000
0.0376125	0.306718	0.241	0.054	1	9	Glyma.10G226300
0.0356664	0.304094	0.241	0.054	1	9	Glyma.06G058100
0.033807	0.301005	0.241	0.054	1	9	Glyma.14G000800
0.0417765	0.268912	0.241	0.054	1	9	Glyma.02G085500
0.00643989	0.54733	0.273	0.086	1	7	Glyma.02G154500
0.00739705	0.482427	0.273	0.086	1	7	Glyma.07G267800
0.00907279	0.470252	0.273	0.086	1	7	Glyma.18G045200
0.0236617	0.465479	0.278	0.091	1	5	Glyma.11G117600
0.00938289	0.453642	0.273	0.086	1	7	Glyma.01G036900
0.0277063	0.339827	0.588	0.4	1	6	Glyma.02G260800
0.0232419	0.328841	0.588	0.4	1	6	Glyma.20G141600
4.45838e-09	0.553725	0.206	0.018	0.000121999	3	Glyma.13G117700
5.39694e-07	0.494145	0.264	0.076	0.0147682	2	Glyma.05G055100
0.00274756	0.488459	0.224	0.036	1	6	Glyma.16G137200
0.0244324	0.484638	0.43	0.242	1	5	Glyma.18G129200
3.88398e-08	0.472077	0.224	0.036	0.00106281	2	Glyma.17G165200
1.17262e-08	0.464711	0.261	0.073	0.000320876	1	Glyma.06G101600
0.00268633	0.448308	0.224	0.036	1	6	Glyma.19G108800
0.0428014	0.425281	0.43	0.242	1	5	Glyma.10G271600
6.91013e-06	0.388961	0.477	0.289	0.189089	1	Glyma.16G210800
0.0411536	0.385327	0.43	0.242	1	5	Glyma.17G128200
0.0103572	0.536848	0.219	0.03	1	5	Glyma.13G272100
0.0100435	0.502886	0.219	0.03	1	5	Glyma.16G087100
1.4613e-06	0.493061	0.27	0.081	0.039987	2	Glyma.01G193600
0.0126177	0.484211	0.219	0.03	1	5	Glyma.12G130000
0.010221	0.481994	0.303	0.114	1	7	Glyma.12G119200
0.0103572	0.472856	0.219	0.03	1	5	Glyma.03G109900
0.0131976	0.430732	0.219	0.03	1	5	Glyma.05G232400
6.77545e-06	0.425212	0.64	0.451	0.185403	4	Glyma.06G265000
0.0012008	0.430548	0.795	0.606	1	5	Glyma.13G012200
1.75919e-06	0.502266	0.225	0.035	0.0481384	4	Glyma.06G267400
7.40258e-10	0.492795	0.241	0.051	2.02564e-05	1	Glyma.15G110300
0.0281459	0.44461	0.311	0.121	1	5	Glyma.12G135600
1.37271e-06	0.430396	0.523	0.333	0.037563	1	Glyma.06G127400
0.0353977	0.415249	0.311	0.121	1	5	Glyma.04G012700
0.0387162	0.395008	0.311	0.121	1	5	Glyma.14G149300
0.0122388	0.438627	0.333	0.143	1	7	Glyma.12G201000
0.014896	0.436331	0.333	0.143	1	7	Glyma.03G194000
0.004634	0.454274	0.282	0.091	1	6	Glyma.16G141500
0.011164	0.534257	0.252	0.061	1	5	Glyma.14G124300
2.05854e-12	0.521698	0.206	0.015	5.63299e-08	1	Glyma.08G201300
0.0143842	0.508127	0.252	0.061	1	5	Glyma.16G215000
0.018786	0.399676	0.482	0.291	1	6	Glyma.13G027800
0.0318421	0.364117	0.518	0.327	1	6	Glyma.18G226850
1.96639e-09	0.50371	0.802	0.611	5.38083e-05	4	Glyma.05G068000
9.37799e-06	0.59637	0.261	0.069	0.256619	4	Glyma.03G053500
0.0325908	0.557416	0.3	0.108	1	8	Glyma.05G208200
1.48831e-09	0.520953	0.207	0.015	4.0726e-05	2	Glyma.09G062600
0.04078	0.508546	0.3	0.108	1	8	Glyma.16G107300
0.00331414	0.505756	0.247	0.055	1	6	Glyma.17G042100
0.00399557	0.440455	0.247	0.055	1	6	Glyma.08G269700
0.0325172	0.453476	0.404	0.212	1	5	Glyma.03G074000
0.0305412	0.435441	0.404	0.212	1	5	Glyma.01G000900
0.0129488	0.575367	0.364	0.171	1	7	Glyma.02G282300
2.80522e-07	0.541393	0.207	0.014	0.00767622	4	Glyma.06G147100
1.03399e-05	0.437385	0.345	0.152	0.282942	2	Glyma.13G174600
7.24004e-08	0.465621	0.296	0.103	0.00198116	1	Glyma.13G266100
5.72109e-05	0.453944	0.297	0.104	1	4	Glyma.03G232600
8.29619e-06	0.383222	0.442	0.249	0.227017	1	Glyma.06G202500
0.0151202	0.477974	0.285	0.091	1	5	Glyma.08G157400
0.0236104	0.45433	0.285	0.091	1	5	Glyma.09G168600
0.028022	0.403455	0.285	0.091	1	5	Glyma.14G001500
5.03463e-05	0.552859	0.486	0.292	1	4	Glyma.08G142000
0.00794699	0.54947	0.394	0.2	1	7	Glyma.02G099500
0.00100292	0.537139	0.212	0.018	1	6	Glyma.01G177700
0.00132335	0.50159	0.212	0.018	1	6	Glyma.16G079200
1.41955e-05	0.501021	0.27	0.076	0.388446	4	Glyma.08G101500
3.96629e-06	0.471199	0.243	0.049	0.108534	4	Glyma.17G020600
0.00902247	0.553268	0.424	0.229	1	7	Glyma.01G019800
3.40833e-08	0.583527	0.241	0.046	0.000932656	2	Glyma.17G057800
3.22666e-05	0.527486	0.306	0.111	0.882944	4	Glyma.08G363600
0.0300421	0.520815	0.276	0.081	1	9	Glyma.17G197700
0.0112743	0.498708	0.225	0.03	1	5	Glyma.06G108100
4.07395e-07	0.493918	0.276	0.081	0.0111479	2	Glyma.09G151400
7.02273e-05	0.491627	0.396	0.201	1	4	Glyma.11G154700
0.0331985	0.457659	0.276	0.081	1	9	Glyma.06G262700
0.0331985	0.442788	0.276	0.081	1	9	Glyma.01G086600
0.0366297	0.43497	0.276	0.081	1	9	Glyma.01G025800
0.0300462	0.420239	0.276	0.081	1	9	Glyma.17G191000
0.0366297	0.396882	0.276	0.081	1	9	Glyma.13G212500
0.0403585	0.372506	0.276	0.081	1	9	Glyma.14G021200
0.0444044	0.365288	0.276	0.081	1	9	Glyma.16G151100
0.0423406	0.364017	0.276	0.081	1	9	Glyma.08G256300
0.0423406	0.363568	0.276	0.081	1	9	Glyma.07G225200
0.0465524	0.358174	0.276	0.081	1	9	Glyma.01G094200
0.0444044	0.353658	0.276	0.081	1	9	Glyma.17G258700
0.0465524	0.350596	0.276	0.081	1	9	Glyma.09G215000
0.0465524	0.349622	0.276	0.081	1	9	Glyma.16G008400
6.80693e-07	0.535742	0.287	0.091	0.0186265	2	Glyma.12G091900
1.32163e-06	0.450142	0.282	0.086	0.036165	2	Glyma.14G118100
3.33111e-05	0.503853	0.432	0.236	0.911526	4	Glyma.17G197700
0.0107099	0.452888	0.341	0.145	1	6	Glyma.17G239000
0.0105902	0.355709	0.706	0.509	1	6	Glyma.06G295700
0.0474213	0.310753	0.742	0.545	1	5	Glyma.18G244100
2.17838e-11	0.547061	0.226	0.029	5.96092e-07	1	Glyma.16G033900
0.00866126	0.547054	0.258	0.061	1	5	Glyma.06G101600
0.00781769	0.478541	0.306	0.109	1	6	Glyma.18G244100
0.0176665	0.471959	0.258	0.061	1	5	Glyma.18G254300
0.00657065	0.466193	0.306	0.109	1	6	Glyma.04G012700
0.0238224	0.450484	0.318	0.121	1	5	Glyma.06G265100
0.0290538	0.444443	0.318	0.121	1	5	Glyma.07G095800
9.68975e-06	0.552685	0.288	0.09	0.26515	4	Glyma.20G237200
8.44145e-05	0.497897	0.351	0.153	1	4	Glyma.18G195200
0.000502033	0.480689	0.212	0.014	1	7	Glyma.05G103600
0.000107949	0.47149	0.351	0.153	1	4	Glyma.10G225400
0.000562224	0.434653	0.212	0.014	1	7	Glyma.18G029300
0.000594779	0.394677	0.212	0.014	1	7	Glyma.14G049500
0.000629081	0.358363	0.212	0.014	1	7	Glyma.07G057400
1.61675e-09	0.639622	0.216	0.018	4.42407e-05	3	Glyma.16G136600
8.06256e-10	0.579451	0.213	0.015	2.20624e-05	2	Glyma.19G254800
0.0389516	0.540033	0.333	0.135	1	8	Glyma.05G085400
0.00985168	0.530377	0.455	0.257	1	7	Glyma.14G032000
1.79358e-09	0.524916	0.271	0.073	4.90795e-05	1	Glyma.09G182600
0.00358919	0.504475	0.271	0.073	1	6	Glyma.05G098800
0.00338128	0.489716	0.271	0.073	1	6	Glyma.06G262400
0.0047217	0.459917	0.271	0.073	1	6	Glyma.11G117600
0.00163842	0.495029	0.235	0.036	1	6	Glyma.11G022200
0.00179605	0.489429	0.235	0.036	1	6	Glyma.02G232600
0.00163842	0.472289	0.235	0.036	1	6	Glyma.10G253200
0.00225302	0.467968	0.235	0.036	1	6	Glyma.15G156400
0.00225302	0.436497	0.235	0.036	1	6	Glyma.07G207700
0.0308689	0.421882	0.351	0.152	1	5	Glyma.15G160700
0.0325827	0.412397	0.411	0.212	1	5	Glyma.16G079200
0.00162839	0.576617	0.242	0.043	1	7	Glyma.10G013700
0.00148736	0.537695	0.242	0.043	1	7	Glyma.11G013200
0.00728206	0.503337	0.435	0.236	1	6	Glyma.01G019800
6.33962e-09	0.483741	0.276	0.077	0.000173477	1	Glyma.11G096700
0.00314676	0.456525	0.242	0.043	1	7	Glyma.11G215500
8.82346e-07	0.441022	0.452	0.253	0.0241445	1	Glyma.04G012700
2.23746e-07	0.473794	0.342	0.143	0.00612257	1	Glyma.01G129100
0.0120919	0.542992	0.291	0.091	1	5	Glyma.02G165800
0.0157228	0.530018	0.291	0.091	1	5	Glyma.06G226700
1.4493e-08	0.527603	0.241	0.041	0.000396585	2	Glyma.04G230000
0.0139844	0.493631	0.291	0.091	1	5	Glyma.14G016300
6.05785e-05	0.491702	0.36	0.16	1	4	Glyma.18G123800
0.00491079	0.674737	0.2	0	1	8	Glyma.12G132200
0.000444413	0.665929	0.2	0	1	6	Glyma.05G184500
0.00491079	0.636396	0.2	0	1	8	Glyma.09G053700
0.00491079	0.583804	0.2	0	1	8	Glyma.13G352300
0.000444413	0.58116	0.2	0	1	6	Glyma.14G222700
0.00491079	0.567658	0.2	0	1	8	Glyma.03G122200
0.000444413	0.54123	0.2	0	1	6	Glyma.17G222300
0.00491079	0.532963	0.2	0	1	8	Glyma.08G334500
0.000444413	0.528972	0.2	0	1	6	Glyma.09G005700
0.000444413	0.520841	0.2	0	1	6	Glyma.20G063100
0.00491079	0.50848	0.2	0	1	8	Glyma.13G029200
5.11667e-12	0.501357	0.226	0.026	1.40013e-07	1	Glyma.07G132900
0.00491079	0.491464	0.2	0	1	8	Glyma.08G339300
0.00491079	0.48999	0.2	0	1	8	Glyma.01G086600
0.00491079	0.344102	0.2	0	1	8	Glyma.04G048400
0.0158158	0.599498	0.8	0.6	1	12	Glyma.13G012200
9.7095e-08	0.530052	0.377	0.176	0.00265691	1	Glyma.11G213000
1.04614e-10	0.639171	0.207	0.005	2.86265e-06	2	Glyma.06G061900
1.78902e-07	0.549391	0.293	0.091	0.00489547	2	Glyma.14G129100
1.01405e-06	0.474831	0.422	0.22	0.0277484	1	Glyma.02G158200
0.00696264	0.603564	0.232	0.03	1	5	Glyma.13G004400
0.00449123	0.595916	0.273	0.071	1	7	Glyma.06G185300
0.00372276	0.594165	0.273	0.071	1	7	Glyma.06G137000
0.00696264	0.588298	0.232	0.03	1	5	Glyma.09G191700
0.00401453	0.552644	0.273	0.071	1	7	Glyma.06G027700
0.00304823	0.529405	0.329	0.127	1	6	Glyma.11G039900
0.0105287	0.52804	0.232	0.03	1	5	Glyma.01G160100
0.0041381	0.527596	0.329	0.127	1	6	Glyma.08G094500
2.23424e-10	0.510332	0.261	0.059	6.11377e-06	1	Glyma.07G039600
0.00428725	0.503638	0.329	0.127	1	6	Glyma.05G220300
3.39617e-06	0.493743	0.339	0.137	0.0929328	2	Glyma.16G033900
0.024373	0.491224	0.31	0.108	1	9	Glyma.02G232600
0.0425665	0.465826	0.31	0.108	1	9	Glyma.16G074700
0.00719089	0.460041	0.329	0.127	1	6	Glyma.04G236900
0.0389089	0.457582	0.31	0.108	1	9	Glyma.10G119200
0.025723	0.454692	0.384	0.182	1	5	Glyma.03G053602
0.0407029	0.443308	0.31	0.108	1	9	Glyma.03G248600
0.0389089	0.442463	0.31	0.108	1	9	Glyma.18G123800
0.0371826	0.440056	0.31	0.108	1	9	Glyma.16G102300
0.0389089	0.400374	0.31	0.108	1	9	Glyma.04G226700
4.12547e-06	0.439829	0.563	0.36	0.112889	2	Glyma.06G265000
0.00567729	0.608682	0.303	0.1	1	7	Glyma.16G071500
1.79307e-06	0.598791	0.299	0.096	0.0490656	3	Glyma.06G265000
0.00646643	0.41438	0.294	0.091	1	6	Glyma.20G053400
6.62829e-11	0.530634	0.251	0.048	1.81377e-06	1	Glyma.05G180100
5.283e-10	0.524689	0.218	0.015	1.44564e-05	2	Glyma.11G206100
1.04462e-05	0.515708	0.279	0.076	0.28585	4	Glyma.05G082200
2.61149e-06	0.490467	0.252	0.049	0.0714609	4	Glyma.16G151100
0.014995	0.54773	0.325	0.121	1	5	Glyma.06G116300
0.00193893	0.521158	0.259	0.055	1	6	Glyma.02G039000
3.29979e-06	0.518535	0.443	0.239	0.0902954	2	Glyma.07G004300
0.00152582	0.498828	0.259	0.055	1	6	Glyma.11G206100
0.00166557	0.494698	0.259	0.055	1	6	Glyma.02G208000
0.00185691	0.488976	0.259	0.055	1	6	Glyma.01G132000
2.95113e-05	0.484843	0.315	0.111	0.807548	4	Glyma.11G060200
0.00468678	0.599388	0.205	0	1	5	Glyma.16G169700
0.00468678	0.566727	0.205	0	1	5	Glyma.09G054700
4.18081e-09	0.563186	0.241	0.036	0.000114404	2	Glyma.05G197000
0.00468678	0.556107	0.205	0	1	5	Glyma.18G254400
0.00468678	0.547734	0.205	0	1	5	Glyma.20G188300
0.00468678	0.533427	0.205	0	1	5	Glyma.06G293400
0.0482217	0.408067	0.417	0.212	1	5	Glyma.13G027300
3.19536e-10	0.489727	0.256	0.051	8.74377e-06	1	Glyma.19G254800
7.3295e-06	0.484697	0.595	0.389	0.200565	4	Glyma.17G073200
0.00674739	0.468873	0.57	0.364	1	5	Glyma.18G281700
8.91448e-08	0.477865	0.367	0.161	0.00243936	1	Glyma.18G045200
0.00852312	0.606802	0.233	0.027	1	8	Glyma.16G022900
0.00852312	0.598977	0.233	0.027	1	8	Glyma.18G003200
0.000606338	0.574294	0.224	0.018	1	6	Glyma.14G031000
0.000845022	0.567287	0.224	0.018	1	6	Glyma.18G192800
0.00063843	0.564892	0.224	0.018	1	6	Glyma.03G054600
0.00971432	0.556239	0.233	0.027	1	8	Glyma.09G130400
0.00971432	0.54767	0.233	0.027	1	8	Glyma.09G251200
0.00971432	0.540351	0.233	0.027	1	8	Glyma.10G255700
0.00971432	0.536204	0.233	0.027	1	8	Glyma.05G184500
0.000803362	0.514807	0.224	0.018	1	6	Glyma.16G215000
0.000803362	0.51108	0.224	0.018	1	6	Glyma.03G232600
0.000845022	0.506193	0.224	0.018	1	6	Glyma.02G137700
0.000783255	0.505116	0.224	0.018	1	6	Glyma.08G297900
3.22304e-08	0.459287	0.312	0.106	0.000881952	1	Glyma.09G075500
0.0103638	0.450064	0.233	0.027	1	8	Glyma.19G166500
0.00971432	0.447699	0.233	0.027	1	8	Glyma.11G100400
0.0117799	0.394491	0.233	0.027	1	8	Glyma.11G136000
0.0110517	0.38825	0.233	0.027	1	8	Glyma.16G217100
0.00420195	0.600034	0.207	0	1	9	Glyma.18G213200
0.0108788	0.581327	0.298	0.091	1	5	Glyma.08G142000
0.00420195	0.576206	0.207	0	1	9	Glyma.19G094800
1.06821e-14	0.573352	0.211	0.004	2.92305e-10	1	Glyma.13G361900
0.00420195	0.566661	0.207	0	1	9	Glyma.07G067900
0.00420195	0.560864	0.207	0	1	9	Glyma.11G094500
1.16122e-08	0.560686	0.207	0	0.000317755	4	Glyma.02G215700
0.00420195	0.559014	0.207	0	1	9	Glyma.01G108700
0.00420195	0.557672	0.207	0	1	9	Glyma.20G054500
0.00420195	0.515938	0.207	0	1	9	Glyma.06G264100
0.00420195	0.508557	0.207	0	1	9	Glyma.07G039700
0.00420195	0.508458	0.207	0	1	9	Glyma.17G057800
0.00420195	0.506536	0.207	0	1	9	Glyma.09G062600
0.0130959	0.502961	0.298	0.091	1	5	Glyma.17G214100
0.00420195	0.501058	0.207	0	1	9	Glyma.11G207000
0.00420195	0.500236	0.207	0	1	9	Glyma.15G126100
0.00420195	0.469814	0.207	0	1	9	Glyma.15G229600
0.00420195	0.46636	0.207	0	1	9	Glyma.12G193800
0.00420195	0.464524	0.207	0	1	9	Glyma.05G211600
0.0143475	0.456058	0.298	0.091	1	5	Glyma.15G219200
0.00420195	0.454202	0.207	0	1	9	Glyma.14G032000
0.00420195	0.447253	0.207	0	1	9	Glyma.04G089700
0.00420195	0.443494	0.207	0	1	9	Glyma.02G222300
0.00420195	0.441705	0.207	0	1	9	Glyma.18G247650
0.00420195	0.430025	0.207	0	1	9	Glyma.17G166000
0.00420195	0.429336	0.207	0	1	9	Glyma.13G339800
0.00420195	0.425065	0.207	0	1	9	Glyma.12G101400
0.00420195	0.42046	0.207	0	1	9	Glyma.16G214500
0.00420195	0.420161	0.207	0	1	9	Glyma.06G123700
0.00420195	0.419945	0.207	0	1	9	Glyma.03G103900
0.00420195	0.414259	0.207	0	1	9	Glyma.16G095600
0.00420195	0.391187	0.207	0	1	9	Glyma.07G048300
0.00420195	0.389418	0.207	0	1	9	Glyma.19G074200
0.00420195	0.378439	0.207	0	1	9	Glyma.13G272100
0.00420195	0.378426	0.207	0	1	9	Glyma.13G317250
0.00420195	0.374314	0.207	0	1	9	Glyma.04G050400
0.00420195	0.367666	0.207	0	1	9	Glyma.03G169000
0.00420195	0.36756	0.207	0	1	9	Glyma.16G172100
0.00420195	0.359884	0.207	0	1	9	Glyma.13G033300
0.00420195	0.355726	0.207	0	1	9	Glyma.04G206300
0.00420195	0.349201	0.207	0	1	9	Glyma.15G104900
0.00420195	0.339272	0.207	0	1	9	Glyma.09G089700
1.27732e-08	0.584215	0.253	0.046	0.000349527	2	Glyma.07G067900
1.38013e-06	0.518722	0.339	0.132	0.037766	2	Glyma.12G236500
4.36539e-08	0.478635	0.332	0.125	0.00119455	1	Glyma.09G095700
4.1444e-07	0.4415	0.452	0.245	0.0113407	1	Glyma.05G082200
0.038189	0.431801	0.586	0.378	1	9	Glyma.02G158200
0.00671104	0.585865	0.238	0.03	1	5	Glyma.18G067500
0.00573799	0.573083	0.238	0.03	1	5	Glyma.05G133100
0.00884245	0.5691	0.238	0.03	1	5	Glyma.11G083800
0.003984	0.536273	0.353	0.145	1	6	Glyma.17G073200
0.00982267	0.487097	0.238	0.03	1	5	Glyma.18G219600
0.00740989	0.443227	0.353	0.145	1	6	Glyma.10G271200
0.00439745	0.66727	0.394	0.186	1	7	Glyma.08G264900
3.25826e-08	0.582497	0.258	0.05	0.000891591	3	Glyma.02G282300
5.79465e-13	0.554581	0.226	0.018	1.58565e-08	1	Glyma.01G128100
3.71813e-06	0.51912	0.27	0.062	0.101743	4	Glyma.05G204600
3.57308e-08	0.499973	0.264	0.056	0.000977738	2	Glyma.09G095700
2.69388e-05	0.464823	0.333	0.125	0.737154	4	Glyma.17G119000
0.00198957	0.488717	0.553	0.345	1	6	Glyma.14G142300
0.00382834	0.452998	0.282	0.073	1	6	Glyma.08G339300
0.00314655	0.447063	0.282	0.073	1	6	Glyma.19G261200
2.37108e-08	0.594005	0.216	0.007	0.000648823	4	Glyma.13G033500
0.00344848	0.512872	0.318	0.109	1	6	Glyma.11G082300
0.0303728	0.484094	0.345	0.135	1	9	Glyma.06G292200
0.0466833	0.442517	0.345	0.135	1	9	Glyma.14G213500
5.28466e-09	0.762289	0.247	0.037	0.00014461	3	Glyma.03G053500
5.74465e-14	0.602671	0.221	0.011	1.57196e-09	1	Glyma.13G265700
7.11948e-07	0.524431	0.252	0.042	0.0194817	4	Glyma.13G117700
0.0173633	0.463917	0.331	0.121	1	5	Glyma.07G095900
0.0284819	0.416367	0.331	0.121	1	5	Glyma.18G045200
0.000820011	0.561716	0.247	0.036	1	6	Glyma.13G117700
0.000968012	0.554259	0.247	0.036	1	6	Glyma.03G109900
0.00122267	0.491105	0.247	0.036	1	6	Glyma.16G151100
5.34707e-09	0.543916	0.317	0.106	0.000146317	1	Glyma.18G244100
0.0292447	0.508514	0.4	0.189	1	8	Glyma.20G170000
0.0385291	0.480915	0.4	0.189	1	8	Glyma.06G001900
0.0130984	0.475569	0.272	0.061	1	5	Glyma.17G214900
0.0136446	0.472357	0.272	0.061	1	5	Glyma.20G020200
0.0112716	0.454002	0.447	0.236	1	6	Glyma.10G221500
7.47438e-05	0.606409	0.212	0	1	7	Glyma.14G222700
0.00028595	0.584828	0.212	0	1	6	Glyma.10G230600
0.00845602	0.572217	0.364	0.152	1	5	Glyma.11G039900
7.47438e-05	0.57086	0.212	0	1	7	Glyma.05G215900
0.00028595	0.564493	0.212	0	1	6	Glyma.U031414
7.47438e-05	0.563948	0.212	0	1	7	Glyma.13G361900
0.00028595	0.56019	0.212	0	1	6	Glyma.09G181600
0.00028595	0.549186	0.212	0	1	6	Glyma.04G139100
7.47438e-05	0.545685	0.212	0	1	7	Glyma.15G076500
0.00028595	0.539227	0.212	0	1	6	Glyma.15G059700
0.00395907	0.515247	0.212	0	1	5	Glyma.01G177700
7.47438e-05	0.487979	0.212	0	1	7	Glyma.09G130400
0.0259658	0.410026	0.424	0.212	1	5	Glyma.15G166700
5.50295e-07	0.59418	0.261	0.049	0.0150583	4	Glyma.18G244100
1.19087e-05	0.376993	0.477	0.264	0.325868	1	Glyma.05G215900
0.000568478	0.749555	0.242	0.029	1	7	Glyma.08G339500
5.44677e-09	0.578482	0.367	0.154	0.000149045	1	Glyma.19G068300
0.00051326	0.561638	0.242	0.029	1	7	Glyma.07G093700
0.000463074	0.553813	0.242	0.029	1	7	Glyma.18G109100
0.000661756	0.534351	0.242	0.029	1	7	Glyma.02G114100
6.91649e-08	0.525014	0.447	0.234	0.00189263	1	Glyma.03G134200
0.000808341	0.448862	0.242	0.029	1	7	Glyma.06G263900
4.95843e-08	0.607368	0.268	0.055	0.00135683	3	Glyma.19G136400
0.0134654	0.603262	0.267	0.054	1	8	Glyma.13G304400
0.0120084	0.595497	0.267	0.054	1	8	Glyma.15G137000
0.0113338	0.586179	0.267	0.054	1	8	Glyma.09G020800
0.010693	0.570827	0.267	0.054	1	8	Glyma.16G068900
0.0142508	0.556122	0.267	0.054	1	8	Glyma.06G156600
0.0134654	0.553491	0.267	0.054	1	8	Glyma.13G135900
5.95227e-09	0.549833	0.259	0.046	0.000162878	2	Glyma.05G180100
0.0134654	0.542118	0.267	0.054	1	8	Glyma.12G077400
0.0150764	0.538905	0.267	0.054	1	8	Glyma.12G130000
0.0178111	0.525138	0.267	0.054	1	8	Glyma.16G009000
0.0168548	0.508037	0.267	0.054	1	8	Glyma.17G083300
0.0159438	0.469267	0.267	0.054	1	8	Glyma.09G104200
0.0209711	0.418957	0.267	0.054	1	8	Glyma.13G175200
0.0483846	0.603027	0.214	0	1	10	Glyma.10G185200
0.0483846	0.585289	0.214	0	1	10	Glyma.10G024300
0.00716252	0.562001	0.241	0.027	1	9	Glyma.08G044400
0.0483846	0.560142	0.214	0	1	10	Glyma.07G222700
0.0483846	0.556528	0.214	0	1	10	Glyma.02G107700
0.0483846	0.554118	0.214	0	1	10	Glyma.16G069200
0.00820265	0.544895	0.241	0.027	1	9	Glyma.07G132900
0.010017	0.541407	0.241	0.027	1	9	Glyma.15G156400
0.0483846	0.537317	0.214	0	1	10	Glyma.11G243500
0.0483846	0.532355	0.214	0	1	10	Glyma.04G054200
0.0483846	0.532274	0.214	0	1	10	Glyma.U031414
0.0483846	0.524046	0.214	0	1	10	Glyma.11G094500
0.0483846	0.522051	0.214	0	1	10	Glyma.19G228300
0.0483846	0.521395	0.214	0	1	10	Glyma.16G076400
0.0483846	0.518668	0.214	0	1	10	Glyma.14G006900
2.67261e-07	0.517027	0.305	0.091	0.00731332	2	Glyma.06G260100
0.00820265	0.516597	0.241	0.027	1	9	Glyma.15G121500
0.0483846	0.507943	0.214	0	1	10	Glyma.04G200400
0.0483846	0.50353	0.214	0	1	10	Glyma.11G069300
0.0483846	0.501861	0.214	0	1	10	Glyma.06G259150
0.0483846	0.499354	0.214	0	1	10	Glyma.08G044300
0.0483846	0.498735	0.214	0	1	10	Glyma.13G372100
0.0483846	0.496065	0.214	0	1	10	Glyma.02G028600
0.0483846	0.494537	0.214	0	1	10	Glyma.13G184800
4.26203e-07	0.494125	0.305	0.091	0.0116626	2	Glyma.09G027900
0.0483846	0.493911	0.214	0	1	10	Glyma.17G019000
0.0483846	0.491776	0.214	0	1	10	Glyma.01G087500
0.0483846	0.49113	0.214	0	1	10	Glyma.07G094500
0.0483846	0.488201	0.214	0	1	10	Glyma.U008900
0.00820265	0.484952	0.241	0.027	1	9	Glyma.08G152500
0.0483846	0.48196	0.214	0	1	10	Glyma.01G163300
0.00820265	0.47966	0.241	0.027	1	9	Glyma.11G206700
0.0483846	0.479492	0.214	0	1	10	Glyma.17G258200
0.0483846	0.476177	0.214	0	1	10	Glyma.15G166600
0.00716252	0.471811	0.241	0.027	1	9	Glyma.13G349200
0.0483846	0.471478	0.214	0	1	10	Glyma.02G150200
0.0483846	0.46772	0.214	0	1	10	Glyma.08G168800
0.010017	0.465134	0.241	0.027	1	9	Glyma.07G068750
8.3721e-06	0.461112	0.437	0.223	0.229094	2	Glyma.06G202500
0.00877178	0.460145	0.241	0.027	1	9	Glyma.14G059200
0.0483846	0.456119	0.214	0	1	10	Glyma.11G009300
0.0483846	0.449664	0.214	0	1	10	Glyma.12G119200
0.00937595	0.448596	0.241	0.027	1	9	Glyma.17G214100
0.0483846	0.448379	0.214	0	1	10	Glyma.10G292500
0.0106967	0.448354	0.241	0.027	1	9	Glyma.03G256700
0.00877178	0.448268	0.241	0.027	1	9	Glyma.19G102400
0.00877178	0.447897	0.241	0.027	1	9	Glyma.19G180000
0.00937595	0.447762	0.241	0.027	1	9	Glyma.16G131900
0.0483846	0.447514	0.214	0	1	10	Glyma.05G075400
0.0483846	0.442248	0.214	0	1	10	Glyma.04G008700
0.0483846	0.440101	0.214	0	1	10	Glyma.07G163200
0.0483846	0.439513	0.214	0	1	10	Glyma.07G095100
0.00820265	0.437316	0.241	0.027	1	9	Glyma.05G139500
0.00937595	0.43632	0.241	0.027	1	9	Glyma.06G105900
0.00937595	0.433134	0.241	0.027	1	9	Glyma.09G068600
0.0483846	0.432981	0.214	0	1	10	Glyma.11G113400
0.00877178	0.431254	0.241	0.027	1	9	Glyma.03G253200
0.010017	0.429864	0.241	0.027	1	9	Glyma.19G095900
0.00820265	0.426227	0.241	0.027	1	9	Glyma.07G099400
0.00937595	0.424258	0.241	0.027	1	9	Glyma.17G028000
0.0114172	0.423068	0.241	0.027	1	9	Glyma.17G251200
0.010017	0.421026	0.241	0.027	1	9	Glyma.02G108100
0.0483846	0.419729	0.214	0	1	10	Glyma.11G096400
0.00877178	0.414255	0.241	0.027	1	9	Glyma.05G043800
0.0483846	0.410466	0.214	0	1	10	Glyma.20G242100
0.00820265	0.399101	0.241	0.027	1	9	Glyma.17G096400
0.010017	0.399057	0.241	0.027	1	9	Glyma.10G291900
0.00877178	0.383177	0.241	0.027	1	9	Glyma.20G013500
0.0114172	0.354248	0.241	0.027	1	9	Glyma.08G271402
0.0114172	0.33569	0.241	0.027	1	9	Glyma.06G185300
0.0123431	0.418861	0.541	0.327	1	6	Glyma.05G074900
0.00479612	0.625173	0.245	0.03	1	5	Glyma.07G065600
0.00197305	0.586863	0.306	0.091	1	6	Glyma.05G082200
0.00495081	0.571236	0.245	0.03	1	5	Glyma.07G093700
1.56125e-07	0.546114	0.243	0.028	0.00427221	4	Glyma.18G002800
0.00676467	0.545249	0.245	0.03	1	5	Glyma.09G099100
0.00235464	0.516385	0.306	0.091	1	6	Glyma.06G103200
0.00787902	0.44712	0.245	0.03	1	5	Glyma.06G268700
1.09782e-10	0.583767	0.281	0.066	3.00407e-06	1	Glyma.16G076300
1.14502e-05	0.564481	0.396	0.181	0.313324	4	Glyma.11G082300
4.50296e-07	0.509017	0.322	0.107	0.0123219	2	Glyma.05G103600
0.00107195	0.586855	0.271	0.055	1	6	Glyma.05G055100
0.000818651	0.574943	0.271	0.055	1	6	Glyma.07G015800
0.00109646	0.568203	0.273	0.057	1	7	Glyma.08G241600
0.00109604	0.554916	0.271	0.055	1	6	Glyma.01G149000
7.09266e-06	0.548347	0.459	0.243	0.194083	4	Glyma.10G271200
0.000437017	0.618948	0.235	0.018	1	6	Glyma.17G258200
0.000393908	0.613921	0.235	0.018	1	6	Glyma.08G072200
0.000393908	0.593964	0.235	0.018	1	6	Glyma.18G096400
0.00041494	0.553744	0.235	0.018	1	6	Glyma.10G044400
0.000536755	0.53934	0.235	0.018	1	6	Glyma.06G105900
0.0025158	0.537797	0.303	0.086	1	7	Glyma.12G029100
0.0414542	0.487968	0.433	0.216	1	8	Glyma.02G034300
0.04031	0.451634	0.379	0.162	1	9	Glyma.04G164400
0.04031	0.442563	0.379	0.162	1	9	Glyma.16G213700
0.0454858	0.412819	0.379	0.162	1	9	Glyma.03G057800
1.02673e-06	0.615395	0.34	0.123	0.0280954	3	Glyma.17G119000
0.00710717	0.598882	0.338	0.121	1	5	Glyma.11G050900
1.75874e-06	0.560077	0.279	0.062	0.0481262	4	Glyma.02G296600
0.0073759	0.546512	0.278	0.061	1	5	Glyma.03G088400
0.0138922	0.494503	0.338	0.121	1	5	Glyma.13G069800
2.09368e-06	0.483815	0.279	0.062	0.0572915	4	Glyma.08G293100
2.70189e-07	0.438763	0.543	0.326	0.00739344	1	Glyma.05G046000
3.09625e-09	0.700297	0.914	0.697	8.47258e-05	5	Glyma.03G053500
2.43161e-10	0.527842	0.291	0.073	6.65384e-06	1	Glyma.17G250800
2.79985e-06	0.434878	0.739	0.521	0.0766151	4	Glyma.17G150100
1.01544e-08	0.594081	0.225	0.007	0.000277866	4	Glyma.13G004400
5.14432e-07	0.436335	0.427	0.209	0.0140769	1	Glyma.14G074700
1.89955e-09	0.648975	0.264	0.046	5.19792e-05	2	Glyma.18G085400
4.62268e-09	0.553421	0.264	0.046	0.000126495	2	Glyma.08G339300
0.0122063	0.42291	0.4	0.182	1	6	Glyma.03G248600
0.0138383	0.608454	0.3	0.081	1	8	Glyma.03G232700
0.0188611	0.538165	0.3	0.081	1	8	Glyma.09G065300
1.72787e-10	0.536216	0.296	0.077	4.72814e-06	1	Glyma.15G251500
1.62829e-06	0.524423	0.288	0.069	0.0445567	4	Glyma.17G250200
0.0230371	0.505428	0.3	0.081	1	8	Glyma.13G101700
0.0266755	0.454697	0.3	0.081	1	8	Glyma.06G101600
1.17399e-11	0.616038	0.224	0.005	3.21249e-07	2	Glyma.03G054600
1.65119e-12	0.550151	0.256	0.037	4.51831e-08	1	Glyma.16G213700
0.0154657	0.51715	0.371	0.152	1	5	Glyma.05G237200
8.26258e-11	0.530242	0.286	0.066	2.26097e-06	1	Glyma.11G150452
8.51567e-15	0.604277	0.231	0.011	2.33023e-10	1	Glyma.05G184500
0.0056439	0.574997	0.311	0.091	1	5	Glyma.04G064100
3.53052e-11	0.56193	0.23	0.01	9.66091e-07	2	Glyma.13G033000
0.00705793	0.552341	0.311	0.091	1	5	Glyma.09G246600
2.71438e-06	0.540508	0.32	0.1	0.0742763	3	Glyma.02G268000
5.83972e-08	0.61125	0.322	0.102	0.00159798	2	Glyma.18G244100
0.00209271	0.53157	0.329	0.109	1	6	Glyma.14G016300
0.0156672	0.476329	0.523	0.303	1	5	Glyma.14G219700
5.7298e-11	0.633994	0.236	0.015	1.5679e-06	2	Glyma.13G361900
1.17185e-14	0.582704	0.236	0.015	3.20666e-10	1	Glyma.14G222700
0.00502469	0.593658	0.364	0.143	1	7	Glyma.19G166500
1.41327e-10	0.562145	0.241	0.02	3.86727e-06	2	Glyma.06G259100
1.32402e-08	0.59533	0.293	0.071	0.000362304	2	Glyma.16G177900
1.65653e-10	0.658655	0.247	0.025	4.53293e-06	2	Glyma.08G044400
2.47288e-10	0.554207	0.247	0.025	6.76678e-06	2	Glyma.16G215000
1.83895e-08	0.503683	0.372	0.15	0.000503211	1	Glyma.17G188300
1.42276e-12	0.64122	0.266	0.044	3.89325e-08	1	Glyma.07G089300
0.0133331	0.589091	0.276	0.054	1	9	Glyma.03G029900
0.0158384	0.505695	0.276	0.054	1	9	Glyma.16G006400
0.0133331	0.504128	0.276	0.054	1	9	Glyma.08G104600
0.0149608	0.503607	0.276	0.054	1	9	Glyma.15G196400
0.0149608	0.498273	0.276	0.054	1	9	Glyma.10G181100
0.016761	0.470741	0.276	0.054	1	9	Glyma.01G153400
0.0111848	0.469043	0.276	0.054	1	9	Glyma.06G101800
0.0133331	0.460867	0.276	0.054	1	9	Glyma.14G130700
0.0125796	0.459572	0.276	0.054	1	9	Glyma.16G141500
0.0149608	0.436832	0.276	0.054	1	9	Glyma.10G106900
0.0141263	0.424207	0.276	0.054	1	9	Glyma.11G109800
0.0141263	0.403945	0.276	0.054	1	9	Glyma.20G194100
0.0149608	0.401954	0.276	0.054	1	9	Glyma.15G094800
0.016761	0.400486	0.276	0.054	1	9	Glyma.01G185900
0.0187487	0.400455	0.276	0.054	1	9	Glyma.13G049100
0.0158384	0.396471	0.276	0.054	1	9	Glyma.04G057400
0.016761	0.385531	0.276	0.054	1	9	Glyma.19G173300
0.016761	0.377863	0.276	0.054	1	9	Glyma.16G050500
0.0198177	0.3746	0.276	0.054	1	9	Glyma.17G150300
0.0187487	0.373427	0.276	0.054	1	9	Glyma.05G018800
0.0187487	0.314874	0.276	0.054	1	9	Glyma.15G166600
0.00913564	0.587512	0.344	0.121	1	5	Glyma.01G108700
0.0127111	0.548903	0.344	0.121	1	5	Glyma.03G138200
0.000580495	0.576498	0.259	0.036	1	6	Glyma.10G159700
0.00059459	0.56738	0.259	0.036	1	6	Glyma.14G001500
9.77192e-06	0.53652	0.369	0.146	0.267399	4	Glyma.06G065900
0.00668333	0.568597	0.285	0.061	1	5	Glyma.15G213600
0.0175731	0.489277	0.497	0.273	1	5	Glyma.06G264900
0.00382051	0.482247	0.424	0.2	1	6	Glyma.18G281700
0.000183119	0.631349	0.224	0	1	6	Glyma.13G361900
2.90294e-06	0.564959	0.342	0.118	0.079436	4	Glyma.01G096000
0.0291102	0.429711	0.414	0.189	1	9	Glyma.04G228300
0.00281367	0.610599	0.225	0	1	5	Glyma.10G291400
0.0073855	0.57953	0.377	0.152	1	5	Glyma.17G187600
0.0124573	0.529949	0.377	0.152	1	5	Glyma.07G103000
0.0196451	0.651978	0.333	0.108	1	8	Glyma.09G102400
0.0196451	0.607629	0.333	0.108	1	8	Glyma.01G086201
4.01729e-06	0.566071	0.468	0.243	0.109929	4	Glyma.05G046000
0.02481	0.540028	0.333	0.108	1	8	Glyma.16G145400
0.02481	0.43968	0.333	0.108	1	8	Glyma.09G085300
0.0297517	0.417202	0.333	0.108	1	8	Glyma.08G000100
4.99836e-10	0.729307	0.258	0.032	1.36775e-05	3	Glyma.18G244100
8.88339e-09	0.549032	0.442	0.216	0.000243085	1	Glyma.09G027900
5.80571e-11	0.651416	0.247	0.02	1.58867e-06	2	Glyma.08G201300
3.37523e-10	0.555609	0.322	0.095	9.23598e-06	1	Glyma.05G204600
0.0087781	0.536025	0.318	0.091	1	5	Glyma.13G174600
0.0455251	0.402238	0.53	0.303	1	5	Glyma.05G236300
0.000131446	0.667725	0.242	0.014	1	7	Glyma.04G230000
0.000116874	0.645343	0.242	0.014	1	7	Glyma.09G115100
0.00476329	0.643511	0.485	0.257	1	7	Glyma.20G247850
0.000116874	0.55849	0.242	0.014	1	7	Glyma.17G187600
0.000139359	0.554612	0.242	0.014	1	7	Glyma.16G136600
2.61118e-10	0.528223	0.312	0.084	7.14523e-06	1	Glyma.15G003300
0.00361398	0.609685	0.258	0.03	1	5	Glyma.03G232600
5.05296e-10	0.538884	0.327	0.099	1.38269e-05	1	Glyma.08G339400
0.00495375	0.531374	0.258	0.03	1	5	Glyma.07G043900
1.93738e-10	0.620523	0.342	0.114	5.30145e-06	1	Glyma.14G195200
1.46427e-12	0.601273	0.276	0.048	4.00684e-08	1	Glyma.08G072200
2.9222e-10	0.559469	0.342	0.114	7.99632e-06	1	Glyma.07G267800
0.00950675	0.664284	0.31	0.081	1	9	Glyma.08G260500
4.80361e-08	0.568055	0.351	0.122	0.00131446	2	Glyma.16G049000
0.0118529	0.563277	0.31	0.081	1	9	Glyma.04G076000
0.0234078	0.487278	0.31	0.081	1	9	Glyma.19G196700
0.0172204	0.474028	0.31	0.081	1	9	Glyma.17G135500
0.0201073	0.466539	0.31	0.081	1	9	Glyma.09G095700
0.0132115	0.460696	0.31	0.081	1	9	Glyma.05G220000
0.0172204	0.456976	0.31	0.081	1	9	Glyma.13G130000
0.00865521	0.452746	0.623	0.394	1	5	Glyma.10G169600
0.0191012	0.451235	0.31	0.081	1	9	Glyma.14G223400
0.0181395	0.443977	0.31	0.081	1	9	Glyma.17G104200
0.0222589	0.441995	0.31	0.081	1	9	Glyma.03G232700
0.0234078	0.421503	0.31	0.081	1	9	Glyma.18G236000
0.0191012	0.418079	0.31	0.081	1	9	Glyma.01G118350
0.0234078	0.406872	0.31	0.081	1	9	Glyma.11G056000
0.0211592	0.402572	0.31	0.081	1	9	Glyma.02G282300
0.0234078	0.401483	0.31	0.081	1	9	Glyma.18G109100
0.0234078	0.385919	0.31	0.081	1	9	Glyma.12G190800
0.0246079	0.370654	0.31	0.081	1	9	Glyma.14G142100
0.0271688	0.362508	0.31	0.081	1	9	Glyma.07G125600
0.025861	0.360911	0.31	0.081	1	9	Glyma.17G109500
3.27312e-11	0.669564	0.247	0.018	8.95658e-07	3	Glyma.06G259400
2.60797e-10	0.621475	0.259	0.03	7.13646e-06	2	Glyma.13G033500
3.39349e-06	0.577841	0.333	0.104	0.0928595	4	Glyma.17G187600
0.00408742	0.659262	0.351	0.121	1	5	Glyma.13G265700
0.00308226	0.652226	0.351	0.121	1	5	Glyma.19G261200
7.04524e-08	0.578857	0.362	0.132	0.00192786	2	Glyma.18G281700
0.00640956	0.517143	0.291	0.061	1	5	Glyma.01G086600
0.00563465	0.488842	0.412	0.182	1	6	Glyma.18G043600
1.25922e-12	0.678045	0.23	0	3.44572e-08	2	Glyma.05G237200
2.33049e-07	0.586203	0.279	0.049	0.00637715	4	Glyma.11G252200
0.000629046	0.579162	0.273	0.043	1	7	Glyma.18G096400
0.000629046	0.557618	0.273	0.043	1	7	Glyma.07G077700
0.0011065	0.600095	0.376	0.145	1	6	Glyma.17G188300
0.0012858	0.600029	0.376	0.145	1	6	Glyma.01G025800
0.00260896	0.497204	0.376	0.145	1	6	Glyma.13G235300
6.70149e-07	0.619798	0.315	0.083	0.018338	4	Glyma.03G134200
0.0223088	0.619577	0.367	0.135	1	8	Glyma.04G192300
1.85841e-07	0.587241	0.42	0.188	0.00508535	2	Glyma.15G160700
0.024364	0.570755	0.367	0.135	1	8	Glyma.12G032800
0.0254518	0.514372	0.367	0.135	1	8	Glyma.05G204600
0.0388439	0.449137	0.367	0.135	1	8	Glyma.10G142500
0.00236702	0.641945	0.232	0	1	5	Glyma.09G145600
0.00236702	0.592207	0.232	0	1	5	Glyma.08G044300
0.00236702	0.587809	0.232	0	1	5	Glyma.20G063100
0.00236702	0.559101	0.232	0	1	5	Glyma.01G013500
0.0405853	0.463606	0.448	0.216	1	9	Glyma.10G271600
0.0219834	0.444021	0.444	0.212	1	5	Glyma.07G067900
1.4586e-09	0.747257	0.278	0.046	3.99131e-05	3	Glyma.06G137000
0.0025379	0.500904	0.541	0.309	1	6	Glyma.07G136500
0.00924429	0.416514	0.541	0.309	1	6	Glyma.18G155400
0.00218635	0.571902	0.233	0	1	8	Glyma.02G282300
0.00755119	0.501687	0.536	0.303	1	5	Glyma.12G232300
2.62016e-10	0.600448	0.362	0.128	7.16982e-06	1	Glyma.10G203000
8.43387e-07	0.506059	0.437	0.203	0.0230785	2	Glyma.20G170000
0.00506557	0.629221	0.325	0.091	1	5	Glyma.06G061900
1.08414e-14	0.614428	0.256	0.022	2.96664e-10	1	Glyma.06G293400
9.64126e-08	0.449896	0.538	0.304	0.00263823	1	Glyma.20G187400
0.000116691	0.663896	0.235	0	1	6	Glyma.06G317800
0.000116691	0.653516	0.235	0	1	6	Glyma.10G200700
0.000116691	0.637309	0.235	0	1	6	Glyma.18G067500
0.000116691	0.597365	0.235	0	1	6	Glyma.11G150452
0.000116691	0.592093	0.235	0	1	6	Glyma.17G067200
3.12725e-07	0.57966	0.297	0.062	0.0085574	4	Glyma.09G095700
2.87983e-06	0.574984	0.423	0.188	0.0788038	4	Glyma.01G161500
0.000371487	0.699361	0.271	0.036	1	6	Glyma.12G233400
4.90663e-07	0.651585	0.381	0.146	0.0134265	3	Glyma.05G236300
0.00029069	0.616936	0.271	0.036	1	6	Glyma.12G224000
0.000585742	0.571162	0.271	0.036	1	6	Glyma.20G066100
1.31246e-06	0.571767	0.333	0.097	0.035914	4	Glyma.05G236300
0.00195458	0.547722	0.4	0.164	1	6	Glyma.16G095000
0.00707002	0.51696	0.57	0.333	1	5	Glyma.19G136400
8.44693e-14	0.73495	0.237	0	2.31142e-09	3	Glyma.02G215700
0.0150609	0.592158	0.345	0.108	1	9	Glyma.07G093700
1.12157e-11	0.583135	0.307	0.07	3.06907e-07	1	Glyma.06G260100
0.0183432	0.55776	0.345	0.108	1	9	Glyma.13G235300
0.0183432	0.55091	0.345	0.108	1	9	Glyma.08G363500
0.016631	0.536958	0.345	0.108	1	9	Glyma.10G143900
0.0183432	0.48916	0.345	0.108	1	9	Glyma.05G048000
0.0174687	0.482383	0.345	0.108	1	9	Glyma.13G329600
0.0174687	0.474381	0.345	0.108	1	9	Glyma.03G075300
0.0244378	0.47035	0.345	0.108	1	9	Glyma.08G329200
0.0212004	0.435772	0.345	0.108	1	9	Glyma.08G266300
0.029415	0.350736	0.345	0.108	1	9	Glyma.19G140800
0.00253262	0.643535	0.394	0.157	1	7	Glyma.01G161500
1.02875e-08	0.631163	0.333	0.096	0.000281507	2	Glyma.12G022700
8.94709e-08	0.577778	0.279	0.042	0.00244828	4	Glyma.16G157100
0.00198841	0.677158	0.238	0	1	5	Glyma.11G207500
0.0356221	0.654232	0.238	0	1	10	Glyma.20G209700
0.00198841	0.619062	0.238	0	1	5	Glyma.16G169100
0.00198841	0.610997	0.238	0	1	5	Glyma.09G182600
0.00227492	0.610222	0.424	0.186	1	7	Glyma.17G254900
0.0356221	0.605264	0.238	0	1	10	Glyma.05G209900
0.0356221	0.599092	0.238	0	1	10	Glyma.16G014100
0.0356221	0.5898	0.238	0	1	10	Glyma.08G220500
0.0356221	0.576232	0.238	0	1	10	Glyma.18G219700
0.0356221	0.56795	0.238	0	1	10	Glyma.03G076800
0.0356221	0.536394	0.238	0	1	10	Glyma.07G040600
0.0356221	0.533671	0.238	0	1	10	Glyma.09G062101
0.0356221	0.532541	0.238	0	1	10	Glyma.08G017900
0.0356221	0.520062	0.238	0	1	10	Glyma.06G045400
0.0356221	0.516232	0.238	0	1	10	Glyma.20G207700
0.0356221	0.505742	0.238	0	1	10	Glyma.11G154005
0.0356221	0.491622	0.238	0	1	10	Glyma.06G140600
0.0356221	0.480872	0.238	0	1	10	Glyma.12G229000
0.0104338	0.731141	0.4	0.162	1	8	Glyma.09G240900
0.000975859	0.609807	0.329	0.091	1	6	Glyma.09G095700
0.0322747	0.478991	0.4	0.162	1	8	Glyma.20G135800
0.0378609	0.47153	0.4	0.162	1	8	Glyma.17G044500
2.05286e-07	0.744458	0.315	0.076	0.00561745	4	Glyma.06G137000
0.000510377	0.654036	0.294	0.055	1	6	Glyma.02G114100
6.78918e-10	0.647899	0.305	0.066	1.85779e-05	2	Glyma.09G181600
0.000396452	0.630014	0.294	0.055	1	6	Glyma.02G296600
1.08805e-13	0.597581	0.276	0.037	2.97735e-09	1	Glyma.13G033000
9.63641e-12	0.724808	0.342	0.103	2.63691e-07	1	Glyma.12G233400
0.0381444	0.520859	0.483	0.243	1	9	Glyma.08G142000
0.0322241	0.488378	0.483	0.243	1	9	Glyma.11G117600
0.00515246	0.746795	0.267	0.027	1	8	Glyma.06G090200
0.00422091	0.609536	0.267	0.027	1	8	Glyma.15G021400
0.00451291	0.589659	0.267	0.027	1	8	Glyma.15G051700
3.92118e-07	0.542294	0.448	0.208	0.0107299	2	Glyma.07G065600
0.0153729	0.466668	0.331	0.091	1	5	Glyma.01G096000
0.0195209	0.459564	0.543	0.303	1	5	Glyma.10G169300
0.00181928	0.722519	0.241	0	1	9	Glyma.11G050900
0.00181928	0.68625	0.241	0	1	9	Glyma.07G143900
0.00181928	0.664638	0.241	0	1	9	Glyma.09G218600
0.00181928	0.635235	0.241	0	1	9	Glyma.11G204900
0.00181928	0.591859	0.241	0	1	9	Glyma.13G004400
0.00181928	0.562337	0.241	0	1	9	Glyma.06G259100
0.00181928	0.556811	0.241	0	1	9	Glyma.11G230300
0.00181928	0.553114	0.241	0	1	9	Glyma.20G131500
0.00181928	0.552316	0.241	0	1	9	Glyma.07G080700
0.00181928	0.542162	0.241	0	1	9	Glyma.19G006900
0.00181928	0.541368	0.241	0	1	9	Glyma.09G168700
0.00181928	0.535799	0.241	0	1	9	Glyma.19G166500
0.00181928	0.535357	0.241	0	1	9	Glyma.09G075551
0.00181928	0.527992	0.241	0	1	9	Glyma.20G138500
0.00181928	0.526783	0.241	0	1	9	Glyma.07G143500
0.00181928	0.526174	0.241	0	1	9	Glyma.04G244000
0.00181928	0.518008	0.241	0	1	9	Glyma.04G061400
0.00181928	0.513014	0.241	0	1	9	Glyma.06G116300
0.00181928	0.482979	0.241	0	1	9	Glyma.08G303700
0.00181928	0.472117	0.241	0	1	9	Glyma.13G035800
0.00181928	0.461742	0.241	0	1	9	Glyma.16G027200
0.000224428	0.679767	0.259	0.018	1	6	Glyma.12G022700
0.000186903	0.652789	0.259	0.018	1	6	Glyma.13G033500
0.000155337	0.641545	0.259	0.018	1	6	Glyma.09G053700
0.00287229	0.599927	0.455	0.214	1	7	Glyma.06G142900
1.36674e-06	0.589768	0.387	0.146	0.0373996	4	Glyma.06G293400
2.07826e-05	0.806805	0.242	0	0.568694	7	Glyma.15G062700
2.07826e-05	0.57902	0.242	0	0.568694	7	Glyma.11G148989
0.00238075	0.653624	0.272	0.03	1	5	Glyma.14G222700
0.00390232	0.526213	0.272	0.03	1	5	Glyma.07G039600
1.21295e-08	0.681496	0.385	0.142	0.000331912	2	Glyma.03G053500
1.48256e-11	0.633032	0.342	0.099	4.05688e-07	1	Glyma.08G339500
3.09186e-10	0.595644	0.427	0.183	8.46056e-06	1	Glyma.17G187600
0.0146832	0.58315	0.379	0.135	1	9	Glyma.18G279800
0.000998457	0.575735	0.353	0.109	1	6	Glyma.19G232400
1.9153e-08	0.55619	0.351	0.107	0.000524104	2	Glyma.09G078700
1.80082e-06	0.54495	0.369	0.125	0.0492777	4	Glyma.10G151000
0.0146832	0.510915	0.379	0.135	1	9	Glyma.13G106900
0.0233132	0.452481	0.379	0.135	1	9	Glyma.08G021900
0.0243805	0.451604	0.379	0.135	1	9	Glyma.20G053400
0.0375952	0.415836	0.379	0.135	1	9	Glyma.06G265100
0.0408673	0.401297	0.379	0.135	1	9	Glyma.09G069800
0.0331062	0.399419	0.379	0.135	1	9	Glyma.17G204000
0.0278404	0.378674	0.379	0.135	1	9	Glyma.04G146900
0.0443777	0.378306	0.379	0.135	1	9	Glyma.10G096800
0.000142759	0.718287	0.273	0.029	1	7	Glyma.17G230500
0.000195905	0.656559	0.273	0.029	1	7	Glyma.08G339300
2.1704e-15	0.628821	0.266	0.022	5.93909e-11	1	Glyma.09G062900
0.00191762	0.48709	0.553	0.309	1	6	Glyma.01G214300
0.00166788	0.676951	0.245	0	1	5	Glyma.08G201300
0.00166789	0.639303	0.245	0	1	5	Glyma.13G117700
0.0313804	0.472475	0.759	0.514	1	9	Glyma.13G152780
3.56847e-07	0.651923	0.342	0.097	0.00976476	4	Glyma.06G018700
0.00447046	0.644626	0.397	0.152	1	5	Glyma.16G169500
3.1768e-14	0.697287	0.286	0.04	8.69298e-10	1	Glyma.16G137000
6.51899e-11	0.675239	0.287	0.041	1.78386e-06	2	Glyma.13G032600
0.00488447	0.709342	0.3	0.054	1	8	Glyma.08G339500
0.00699079	0.679186	0.3	0.054	1	8	Glyma.17G138800
0.000593374	0.656155	0.303	0.057	1	7	Glyma.02G028700
0.000593374	0.609427	0.303	0.057	1	7	Glyma.12G112000
7.39801e-05	0.638127	0.247	0	1	6	Glyma.02G028700
7.39801e-05	0.621332	0.247	0	1	6	Glyma.05G197000
0.00121131	0.585624	0.447	0.2	1	6	Glyma.19G166500
0.036697	0.475762	0.517	0.27	1	9	Glyma.11G171355
0.000687629	0.61171	0.333	0.086	1	7	Glyma.07G004300
0.000906843	0.597421	0.333	0.086	1	7	Glyma.17G165200
0.0123409	0.515519	0.338	0.091	1	5	Glyma.08G044400
0.000859588	0.575934	0.412	0.164	1	6	Glyma.18G123800
4.88654e-07	0.637417	0.387	0.139	0.0133715	4	Glyma.14G223400
0.043771	0.595568	0.31	0.062	1	10	Glyma.09G256000
0.0462504	0.592816	0.31	0.062	1	10	Glyma.06G187300
0.039148	0.547116	0.31	0.062	1	10	Glyma.14G119100
0.0462504	0.515584	0.31	0.062	1	10	Glyma.06G001900
0.00197442	0.6626	0.278	0.03	1	5	Glyma.16G210800
0.00345933	0.638805	0.276	0.027	1	9	Glyma.19G201000
0.00345933	0.633881	0.276	0.027	1	9	Glyma.17G039800
0.00322616	0.612337	0.276	0.027	1	9	Glyma.07G095800
0.00397228	0.574851	0.276	0.027	1	9	Glyma.16G210600
0.00487189	0.570316	0.276	0.027	1	9	Glyma.16G033900
0.00425384	0.547042	0.276	0.027	1	9	Glyma.18G000100
0.00370775	0.51625	0.276	0.027	1	9	Glyma.05G101700
0.00397228	0.511475	0.276	0.027	1	9	Glyma.07G066800
0.00370775	0.494295	0.276	0.027	1	9	Glyma.02G263900
0.00397228	0.494203	0.276	0.027	1	9	Glyma.08G181200
0.00521044	0.492416	0.276	0.027	1	9	Glyma.07G126200
0.00455338	0.481203	0.276	0.027	1	9	Glyma.10G171900
0.00487189	0.480618	0.276	0.027	1	9	Glyma.13G371900
0.00397228	0.448826	0.276	0.027	1	9	Glyma.08G283400
0.00425384	0.447945	0.276	0.027	1	9	Glyma.17G214900
1.30773e-07	0.763272	0.486	0.236	0.00357848	4	Glyma.12G233400
4.6385e-17	0.712683	0.261	0.011	1.26928e-12	1	Glyma.13G028100
0.00285953	0.633882	0.311	0.061	1	5	Glyma.15G258400
3.6867e-13	0.597908	0.312	0.062	1.00883e-08	1	Glyma.12G091900
0.000754883	0.559681	0.341	0.091	1	6	Glyma.09G182600
8.33412e-08	0.549023	0.448	0.198	0.00228055	2	Glyma.17G128200
0.0163118	0.51861	0.655	0.405	1	9	Glyma.03G014300
7.9818e-12	0.692674	0.387	0.136	2.18414e-07	1	Glyma.18G195200
0.000211424	0.657656	0.306	0.055	1	6	Glyma.06G127700
0.000486495	0.570369	0.306	0.055	1	6	Glyma.03G131000
0.0279991	0.498226	0.467	0.216	1	8	Glyma.11G256800
2.5302e-11	0.747487	0.293	0.041	6.92365e-07	2	Glyma.16G135200
0.00139694	0.66277	0.252	0	1	5	Glyma.03G054100
5.04501e-10	0.636479	0.328	0.076	1.38052e-05	2	Glyma.09G018900
0.010278	0.558961	0.333	0.081	1	8	Glyma.07G249800
2.93525e-07	0.522342	0.506	0.254	0.00803203	2	Glyma.05G046000
0.029097	0.481985	0.414	0.162	1	9	Glyma.10G086800
0.0279036	0.477383	0.414	0.162	1	9	Glyma.18G096400
0.0279036	0.458289	0.414	0.162	1	9	Glyma.05G082200
0.0256429	0.458163	0.414	0.162	1	9	Glyma.10G174800
0.029097	0.455835	0.414	0.162	1	9	Glyma.15G203900
0.0235424	0.436994	0.414	0.162	1	9	Glyma.11G237700
3.59669e-11	0.685516	0.299	0.046	9.842e-07	2	Glyma.18G067500
0.00178367	0.651249	0.344	0.091	1	5	Glyma.11G206700
0.00240769	0.535442	0.435	0.182	1	6	Glyma.05G079700
1.59513e-10	0.638726	0.305	0.051	4.36492e-06	2	Glyma.12G112000
6.75396e-10	0.550307	0.422	0.168	1.84815e-05	1	Glyma.15G219300
7.57175e-12	0.729439	0.278	0.023	2.07193e-07	3	Glyma.08G339400
0.00158149	0.661973	0.285	0.03	1	5	Glyma.05G197000
0.00212286	0.643432	0.285	0.03	1	5	Glyma.20G058500
0.0056328	0.583142	0.497	0.242	1	5	Glyma.15G160300
0.0307181	0.452931	0.552	0.297	1	9	Glyma.18G281700
0.000217086	0.747157	0.329	0.073	1	6	Glyma.04G236600
1.48797e-12	0.698744	0.337	0.081	4.07169e-08	1	Glyma.09G218600
0.00415558	0.679935	0.31	0.054	1	9	Glyma.11G165710
0.0427027	0.666359	0.381	0.125	1	10	Glyma.18G123800
0.000243263	0.655908	0.329	0.073	1	6	Glyma.18G002800
0.00470896	0.644592	0.31	0.054	1	9	Glyma.20G012900
0.00532823	0.642563	0.31	0.054	1	9	Glyma.10G098400
0.00602013	0.625373	0.31	0.054	1	9	Glyma.04G236600
0.00602013	0.573158	0.31	0.054	1	9	Glyma.17G237900
0.00500995	0.566366	0.31	0.054	1	9	Glyma.16G127900
0.000825706	0.562579	0.365	0.109	1	6	Glyma.14G139800
0.00500995	0.553035	0.31	0.054	1	9	Glyma.18G033500
0.00566466	0.545818	0.31	0.054	1	9	Glyma.20G138800
0.00811697	0.539066	0.31	0.054	1	9	Glyma.09G038600
0.00679197	0.530501	0.31	0.054	1	9	Glyma.09G212900
0.00639558	0.517476	0.31	0.054	1	9	Glyma.14G033600
0.00966879	0.516204	0.31	0.054	1	9	Glyma.17G112500
0.00679197	0.510214	0.31	0.054	1	9	Glyma.07G070700
0.00602013	0.507007	0.31	0.054	1	9	Glyma.15G094700
0.0072103	0.485423	0.31	0.054	1	9	Glyma.09G011200
0.0072103	0.484013	0.31	0.054	1	9	Glyma.13G069800
0.0076516	0.445947	0.31	0.054	1	9	Glyma.13G265800
0.0072103	0.4369	0.31	0.054	1	9	Glyma.16G122200
0.00811697	0.428324	0.31	0.054	1	9	Glyma.13G281400
0.00228072	0.702998	0.318	0.061	1	5	Glyma.17G057800
0.00342617	0.683575	0.318	0.061	1	5	Glyma.06G191300
0.00198507	0.677684	0.318	0.061	1	5	Glyma.19G255300
0.00201606	0.674513	0.318	0.061	1	5	Glyma.04G190400
0.00290776	0.663231	0.318	0.061	1	5	Glyma.16G169200
5.62146e-09	0.612046	0.374	0.117	0.000153826	2	Glyma.05G082200
4.42654e-08	0.605015	0.333	0.076	0.00121128	4	Glyma.02G282300
0.00522035	0.584516	0.318	0.061	1	5	Glyma.16G137200
0.000125361	0.778395	0.294	0.036	1	6	Glyma.06G170700
6.04908e-07	0.618023	0.459	0.201	0.0165527	4	Glyma.08G241200
1.01403e-06	0.585325	0.432	0.174	0.0277478	4	Glyma.04G229900
1.74677e-10	0.536749	0.397	0.139	4.77985e-06	1	Glyma.02G232600
0.00863373	0.694689	0.367	0.108	1	8	Glyma.07G132000
4.66548e-05	0.670323	0.259	0	1	6	Glyma.14G200200
4.66548e-05	0.655882	0.259	0	1	6	Glyma.02G288600
1.65472e-07	0.635407	0.405	0.146	0.00452797	4	Glyma.14G133600
0.00863373	0.617961	0.367	0.108	1	8	Glyma.14G139800
4.01563e-05	0.584832	0.273	0.014	1	7	Glyma.09G062600
0.0179301	0.539369	0.367	0.108	1	8	Glyma.06G259400
0.0179407	0.485652	0.448	0.189	1	9	Glyma.16G101500
0.0436565	0.420983	0.448	0.189	1	9	Glyma.13G072500
0.0346279	0.399631	0.448	0.189	1	9	Glyma.10G048100
2.16198e-09	0.717986	0.288	0.028	5.91603e-05	4	Glyma.15G160300
2.82771e-09	0.621187	0.288	0.028	7.73775e-05	4	Glyma.09G018900
0.000114021	0.742379	0.303	0.043	1	7	Glyma.10G261200
3.85191e-09	0.624722	0.402	0.142	0.000105404	2	Glyma.17G187600
0.000736831	0.608742	0.424	0.164	1	6	Glyma.01G161500
1.75035e-17	0.693366	0.276	0.015	4.78967e-13	1	Glyma.16G215000
0.00141991	0.681106	0.291	0.03	1	5	Glyma.13G361900
0.000514018	0.655606	0.388	0.127	1	6	Glyma.06G147100
0.0192312	0.446481	0.503	0.242	1	5	Glyma.05G204600
0.029425	0.478678	0.586	0.324	1	9	Glyma.09G078700
2.29695e-09	0.747954	0.297	0.035	6.28536e-05	4	Glyma.14G222700
0.0260632	0.733341	0.262	0	1	10	Glyma.15G048500
1.20629e-18	0.725874	0.266	0.004	3.30089e-14	1	Glyma.09G160400
0.000326631	0.718937	0.333	0.071	1	7	Glyma.02G268000
0.0260632	0.71066	0.262	0	1	10	Glyma.18G046300
9.34078e-09	0.671268	0.324	0.062	0.000255601	4	Glyma.01G149000
0.0260632	0.647732	0.262	0	1	10	Glyma.20G189900
0.0260632	0.637108	0.262	0	1	10	Glyma.06G264200
0.0260632	0.625004	0.262	0	1	10	Glyma.18G208800
0.0260632	0.61245	0.262	0	1	10	Glyma.04G141400
0.0260632	0.607538	0.262	0	1	10	Glyma.13G080100
6.70886e-09	0.604668	0.379	0.117	0.000183581	2	Glyma.09G130400
0.0260632	0.601502	0.262	0	1	10	Glyma.14G195000
0.0260632	0.598001	0.262	0	1	10	Glyma.07G045600
0.0260632	0.590597	0.262	0	1	10	Glyma.18G210100
0.0260632	0.570331	0.262	0	1	10	Glyma.17G146600
0.0260632	0.569506	0.262	0	1	10	Glyma.09G062600
0.0260632	0.567236	0.262	0	1	10	Glyma.03G246500
0.0260632	0.56044	0.262	0	1	10	Glyma.05G210300
0.0260632	0.549136	0.262	0	1	10	Glyma.13G222500
0.0260632	0.538374	0.262	0	1	10	Glyma.18G241400
0.0260632	0.533657	0.262	0	1	10	Glyma.12G028700
0.0260632	0.505593	0.262	0	1	10	Glyma.18G269200
0.0260632	0.502415	0.262	0	1	10	Glyma.13G117700
0.00522973	0.584181	0.384	0.121	1	5	Glyma.12G236500
6.43688e-10	0.561743	0.442	0.179	1.76139e-05	1	Glyma.05G236300
5.98798e-05	0.721659	0.282	0.018	1	6	Glyma.08G067600
0.00660117	0.621455	0.345	0.081	1	9	Glyma.03G138200
0.00919568	0.582416	0.345	0.081	1	9	Glyma.12G224000
0.00556896	0.560682	0.345	0.081	1	9	Glyma.05G178200
0.00698168	0.499355	0.345	0.081	1	9	Glyma.08G269700
0.0147995	0.491722	0.345	0.081	1	9	Glyma.12G079500
0.0126647	0.416617	0.345	0.081	1	9	Glyma.10G013700
2.55167e-15	0.683223	0.312	0.048	6.98239e-11	1	Glyma.20G178800
6.60183e-15	0.666779	0.312	0.048	1.80653e-10	1	Glyma.07G015800
4.6609e-09	0.664126	0.306	0.042	0.000127541	4	Glyma.05G098800
4.85255e-12	0.644018	0.367	0.103	1.32785e-07	1	Glyma.16G136600
0.0461192	0.571487	0.452	0.188	1	10	Glyma.11G181200
7.38599e-12	0.738973	0.316	0.051	2.0211e-07	2	Glyma.10G230600
6.37979e-10	0.669478	0.351	0.086	1.74577e-05	2	Glyma.06G147100
0.000737374	0.604021	0.447	0.182	1	6	Glyma.02G268000
9.05869e-08	0.615718	0.342	0.076	0.00247882	4	Glyma.14G016300
4.51503e-10	0.693716	0.288	0.021	1.23549e-05	4	Glyma.20G053400
1.64754e-15	0.694707	0.307	0.04	4.50833e-11	1	Glyma.07G093700
0.000959099	0.593163	0.267	0	1	8	Glyma.09G062600
0.00370594	0.573653	0.358	0.091	1	5	Glyma.12G101400
0.0204623	0.550773	0.483	0.216	1	9	Glyma.04G008300
0.0188461	0.513397	0.483	0.216	1	9	Glyma.11G096400
0.0166311	0.499223	0.483	0.216	1	9	Glyma.15G251500
0.029957	0.423729	0.862	0.595	1	9	Glyma.13G012200
1.24789e-17	0.708235	0.286	0.018	3.41471e-13	1	Glyma.06G317800
1.75414e-13	0.635201	0.352	0.084	4.80002e-09	1	Glyma.15G171000
1.38287e-08	0.693376	0.324	0.056	0.000378409	4	Glyma.16G136600
3.44213e-09	0.620547	0.42	0.152	9.41903e-05	2	Glyma.05G236300
0.0275438	0.551035	0.643	0.375	1	10	Glyma.12G079500
0.00873509	0.508413	0.45	0.182	1	5	Glyma.05G046000
1.14692e-07	0.663821	0.477	0.208	0.00313844	4	Glyma.09G274000
3.10719e-09	0.644674	0.631	0.361	8.50251e-05	4	Glyma.01G214300
0.00256479	0.550579	0.543	0.273	1	5	Glyma.01G061500
0.00641789	0.526333	0.543	0.273	1	5	Glyma.01G086201
0.0142472	0.474766	0.621	0.351	1	9	Glyma.09G054200
0.0275635	0.942352	0.333	0.062	1	10	Glyma.05G059300
0.00772695	0.67128	0.433	0.162	1	8	Glyma.18G291500
0.0345969	0.643654	0.333	0.062	1	10	Glyma.04G075400
0.0345969	0.634393	0.333	0.062	1	10	Glyma.19G006900
0.0309088	0.628074	0.333	0.062	1	10	Glyma.09G181400
0.0275635	0.62138	0.333	0.062	1	10	Glyma.04G228300
0.0365777	0.609645	0.333	0.062	1	10	Glyma.08G297900
0.0309088	0.609332	0.333	0.062	1	10	Glyma.10G291400
0.0386544	0.599506	0.333	0.062	1	10	Glyma.13G303800
3.80997e-08	0.596995	0.489	0.218	0.00104256	2	Glyma.03G134200
0.013985	0.565144	0.433	0.162	1	8	Glyma.01G200800
0.00745761	0.553232	0.379	0.108	1	9	Glyma.07G043900
0.0479909	0.550135	0.333	0.062	1	10	Glyma.02G204300
0.0431094	0.547322	0.333	0.062	1	10	Glyma.12G130000
0.0118272	0.547258	0.379	0.108	1	9	Glyma.18G280500
0.0479909	0.541055	0.333	0.062	1	10	Glyma.07G103000
0.0112492	0.496062	0.379	0.108	1	9	Glyma.02G099500
0.0166641	0.427606	0.379	0.108	1	9	Glyma.08G360000
0.0144112	0.42594	0.379	0.108	1	9	Glyma.17G254900
0.00156285	0.723165	0.3	0.027	1	8	Glyma.06G097800
0.0025246	0.720267	0.3	0.027	1	8	Glyma.01G040700
0.00288532	0.677458	0.3	0.027	1	8	Glyma.14G222700
0.00206033	0.647107	0.3	0.027	1	8	Glyma.18G015500
0.00236016	0.645304	0.3	0.027	1	8	Glyma.12G162999
3.44514e-05	0.718141	0.303	0.029	0.942729	7	Glyma.01G025800
2.06004e-10	0.624857	0.609	0.335	5.63711e-06	2	Glyma.03G136000
0.00202589	0.531065	0.565	0.291	1	6	Glyma.17G104800
0.000216434	0.64978	0.329	0.055	1	6	Glyma.06G263900
0.0483987	0.535976	0.524	0.25	1	10	Glyma.18G045200
0.0226553	0.488862	0.517	0.243	1	9	Glyma.06G202500
2.97102e-11	0.684974	0.351	0.076	8.12989e-07	2	Glyma.08G339500
2.38036e-14	0.828784	0.367	0.092	6.51361e-10	1	Glyma.04G227900
0.00145899	0.731138	0.305	0.03	1	5	Glyma.08G198800
0.00160788	0.686836	0.305	0.03	1	5	Glyma.06G319460
5.67923e-05	0.714434	0.294	0.018	1	6	Glyma.08G339600
0.000775231	0.808083	0.276	0	1	9	Glyma.03G054500
0.000775231	0.766749	0.276	0	1	9	Glyma.09G075500
0.000775231	0.737406	0.276	0	1	9	Glyma.10G229400
0.000775231	0.729155	0.276	0	1	9	Glyma.09G053700
6.46361e-15	0.696407	0.342	0.066	1.7687e-10	1	Glyma.02G284200
2.00021e-15	0.650182	0.327	0.051	5.47339e-11	1	Glyma.07G065600
0.000774925	0.642203	0.276	0	1	9	Glyma.02G024200
0.000775231	0.629219	0.276	0	1	9	Glyma.02G154500
0.000775231	0.62556	0.276	0	1	9	Glyma.06G061900
0.000775231	0.624836	0.276	0	1	9	Glyma.06G095700
0.000775231	0.612436	0.276	0	1	9	Glyma.18G245000
0.000775231	0.605386	0.276	0	1	9	Glyma.12G132000
0.000775231	0.592253	0.276	0	1	9	Glyma.02G136700
0.000775231	0.590733	0.276	0	1	9	Glyma.02G028700
0.000775231	0.588738	0.276	0	1	9	Glyma.09G208300
0.000775231	0.529464	0.276	0	1	9	Glyma.05G228700
0.000775231	0.52465	0.276	0	1	9	Glyma.05G068600
0.000775231	0.521643	0.276	0	1	9	Glyma.19G253000
0.000880798	0.733313	0.338	0.061	1	5	Glyma.08G047300
0.0396043	0.404857	0.655	0.378	1	9	Glyma.17G104800
0.000276747	0.694234	0.364	0.086	1	7	Glyma.19G232400
0.00321305	0.595194	0.43	0.152	1	5	Glyma.09G018900
0.0193923	0.564389	0.467	0.189	1	8	Glyma.13G286300
8.86834e-14	0.740937	0.299	0.02	2.42673e-09	2	Glyma.10G200700
0.016238	0.506486	0.414	0.135	1	9	Glyma.02G268000
0.0134828	0.498098	0.414	0.135	1	9	Glyma.14G219700
0.0111493	0.497853	0.414	0.135	1	9	Glyma.04G068700
0.000431364	0.642217	0.388	0.109	1	6	Glyma.08G339400
2.58011e-10	0.571976	0.528	0.249	7.06022e-06	1	Glyma.09G078700
2.25035e-11	0.695514	0.351	0.071	6.15784e-07	2	Glyma.10G169300
7.77103e-12	0.828101	0.33	0.05	2.12646e-07	3	Glyma.09G248600
0.0325706	0.60439	0.405	0.125	1	10	Glyma.10G179700
0.0487788	0.548182	0.405	0.125	1	10	Glyma.10G142500
0.0487788	0.529427	0.405	0.125	1	10	Glyma.12G132000
2.4038e-15	0.754867	0.347	0.066	6.57776e-11	1	Glyma.10G230600
2.17864e-10	0.57133	0.718	0.437	5.96163e-06	2	Glyma.16G071500
1.82511e-05	0.729988	0.282	0	0.499423	6	Glyma.02G215700
1.82511e-05	0.725908	0.282	0	0.499423	6	Glyma.11G013200
1.82511e-05	0.712612	0.282	0	0.499423	6	Glyma.08G201300
6.17097e-05	0.705503	0.318	0.036	1	6	Glyma.01G096000
0.0165899	0.50197	0.552	0.27	1	9	Glyma.13G027800
0.0330127	0.476772	0.552	0.27	1	9	Glyma.12G073900
0.0274407	0.449746	0.552	0.27	1	9	Glyma.18G129200
0.00139798	0.735982	0.344	0.061	1	5	Glyma.10G229500
0.00153227	0.64617	0.31	0.027	1	9	Glyma.10G230600
0.00153227	0.645611	0.31	0.027	1	9	Glyma.15G076500
0.00164508	0.628228	0.31	0.027	1	9	Glyma.12G194000
0.00164508	0.622654	0.31	0.027	1	9	Glyma.01G040400
0.00217702	0.620462	0.31	0.027	1	9	Glyma.19G263600
0.00142662	0.61763	0.31	0.027	1	9	Glyma.07G266500
0.00132772	0.605041	0.31	0.027	1	9	Glyma.01G096000
0.024269	0.60041	0.595	0.312	1	10	Glyma.13G028100
0.00233263	0.59637	0.31	0.027	1	9	Glyma.16G008600
0.0017655	0.586549	0.31	0.027	1	9	Glyma.16G137200
0.00189397	0.570666	0.31	0.027	1	9	Glyma.14G183000
0.00164508	0.54853	0.31	0.027	1	9	Glyma.10G192400
0.00217702	0.542197	0.31	0.027	1	9	Glyma.12G030100
0.00203097	0.53286	0.31	0.027	1	9	Glyma.13G072800
0.00217702	0.523802	0.31	0.027	1	9	Glyma.02G114100
0.00164508	0.521447	0.31	0.027	1	9	Glyma.19G197500
0.00153227	0.5192	0.31	0.027	1	9	Glyma.16G138300
0.00233263	0.471898	0.31	0.027	1	9	Glyma.13G094800
5.7232e-15	0.865608	0.397	0.114	1.5661e-10	1	Glyma.16G039800
1.08644e-12	0.844905	0.32	0.037	2.97294e-08	3	Glyma.08G339500
0.00144719	0.742861	0.404	0.121	1	5	Glyma.13G032600
0.016501	0.645083	0.5	0.216	1	8	Glyma.17G225700
3.4124e-14	0.761533	0.305	0.02	9.33768e-10	2	Glyma.18G237900
0.000562273	0.75234	0.285	0	1	5	Glyma.02G114100
0.000562273	0.734429	0.285	0	1	5	Glyma.15G059700
0.000178361	0.676851	0.412	0.127	1	6	Glyma.14G074700
6.90114e-05	0.655376	0.612	0.327	1	6	Glyma.08G328800
0.0189367	0.76297	0.286	0	1	10	Glyma.01G019800
0.0189367	0.735655	0.286	0	1	10	Glyma.01G133100
0.0189367	0.702037	0.286	0	1	10	Glyma.09G190300
0.0189367	0.669836	0.286	0	1	10	Glyma.13G033900
0.0189331	0.666963	0.286	0	1	10	Glyma.13G033300
0.0189367	0.653338	0.286	0	1	10	Glyma.02G005600
0.0189367	0.651177	0.286	0	1	10	Glyma.18G182000
0.0189367	0.643755	0.286	0	1	10	Glyma.16G012300
0.00351676	0.604188	0.367	0.081	1	8	Glyma.08G264402
0.0189367	0.603757	0.286	0	1	10	Glyma.18G013700
0.0189367	0.582773	0.286	0	1	10	Glyma.15G000300
2.37286e-13	0.743578	0.322	0.036	6.4931e-09	2	Glyma.08G339600
0.00883459	0.585096	0.448	0.162	1	9	Glyma.03G083100
0.0140196	0.533197	0.448	0.162	1	9	Glyma.10G091000
0.0182856	0.525947	0.448	0.162	1	9	Glyma.04G009400
1.17588e-08	0.722211	0.405	0.118	0.000321768	4	Glyma.08G094500
8.59217e-18	0.715367	0.317	0.029	2.35116e-13	1	Glyma.01G040400
0.0477902	0.570758	0.476	0.188	1	10	Glyma.07G077700
0.000697336	0.780805	0.318	0.03	1	5	Glyma.05G184500
0.000685635	0.735192	0.318	0.03	1	5	Glyma.10G200700
2.68788e-14	0.704961	0.402	0.114	7.35511e-10	1	Glyma.04G228300
8.35403e-06	0.861434	0.303	0.014	0.2286	7	Glyma.08G339600
0.0443576	0.442221	0.586	0.297	1	9	Glyma.14G118100
9.62212e-14	0.643933	0.392	0.103	2.633e-09	1	Glyma.14G008700
0.00399986	0.597465	0.411	0.121	1	5	Glyma.01G040400
4.19637e-09	0.779904	0.387	0.097	0.000114829	4	Glyma.09G248600
0.00312203	0.753298	0.533	0.243	1	8	Glyma.06G172551
3.37834e-05	0.63089	0.635	0.345	0.924448	6	Glyma.10G055300
0.000269411	0.620691	0.435	0.145	1	6	Glyma.07G077700
0.00232917	0.722222	0.345	0.054	1	9	Glyma.20G179600
2.16047e-15	0.664228	0.357	0.066	5.9119e-11	1	Glyma.06G226700
0.00204848	0.659226	0.345	0.054	1	9	Glyma.16G004800
0.0021847	0.574023	0.345	0.054	1	9	Glyma.16G215000
0.00339577	0.555014	0.345	0.054	1	9	Glyma.10G179500
0.00232917	0.55375	0.345	0.054	1	9	Glyma.12G073000
0.0028059	0.492501	0.6	0.309	1	6	Glyma.09G274000
6.01636e-05	0.710764	0.365	0.073	1	6	Glyma.16G157100
0.00362547	0.732831	0.4	0.108	1	8	Glyma.12G234200
0.00112555	0.792238	0.384	0.091	1	5	Glyma.16G176900
0.00081521	0.779405	0.384	0.091	1	5	Glyma.09G181600
3.1138e-05	0.747567	0.329	0.036	0.85206	6	Glyma.04G064100
0.000126723	0.680875	0.529	0.236	1	6	Glyma.20G170000
0.00163609	0.662723	0.384	0.091	1	5	Glyma.06G147100
0.000256296	0.655921	0.494	0.2	1	6	Glyma.08G142000
0.0108357	0.619337	0.483	0.189	1	9	Glyma.12G232300
0.00751747	0.612431	0.483	0.189	1	9	Glyma.09G260600
0.0182565	0.536457	0.483	0.189	1	9	Glyma.17G188300
9.07439e-16	0.765335	0.382	0.088	2.48312e-11	1	Glyma.10G271200
0.00154331	0.686086	0.536	0.242	1	5	Glyma.13G156500
4.43272e-08	0.659896	0.468	0.174	0.00121297	4	Glyma.12G130000
5.0715e-15	0.857461	0.31	0.015	1.38777e-10	2	Glyma.18G216800
0.0256906	0.836646	0.357	0.062	1	10	Glyma.17G222300
0.0216119	0.75803	0.357	0.062	1	10	Glyma.18G067500
0.0203838	0.74728	0.357	0.062	1	10	Glyma.02G195400
0.0256906	0.717873	0.357	0.062	1	10	Glyma.09G115200
0.0358759	0.700169	0.357	0.062	1	10	Glyma.06G137000
0.0242626	0.678671	0.357	0.062	1	10	Glyma.11G050900
0.0242626	0.67547	0.357	0.062	1	10	Glyma.11G163300
0.0378715	0.621527	0.357	0.062	1	10	Glyma.13G272100
0.0321528	0.620935	0.357	0.062	1	10	Glyma.09G191700
0.0287658	0.601582	0.357	0.062	1	10	Glyma.10G048100
0.0421468	0.56376	0.357	0.062	1	10	Glyma.15G115600
0.022904	0.558222	0.357	0.062	1	10	Glyma.19G186900
0.0399606	0.546525	0.357	0.062	1	10	Glyma.20G082450
1.29709e-11	0.745334	0.391	0.096	3.54936e-07	2	Glyma.07G095000
2.68048e-13	0.701934	0.533	0.238	7.33488e-09	1	Glyma.03G053500
2.47206e-11	0.686831	0.397	0.102	6.76455e-07	2	Glyma.05G204600
1.65594e-08	0.668751	0.441	0.146	0.000453132	4	Glyma.12G030100
0.000528373	0.825874	0.417	0.121	1	5	Glyma.09G065300
0.00057282	0.83458	0.358	0.061	1	5	Glyma.09G115200
0.00108703	0.740515	0.358	0.061	1	5	Glyma.16G135200
0.000885571	0.718401	0.358	0.061	1	5	Glyma.13G029200
0.000386207	0.842236	0.298	0	1	5	Glyma.04G017200
0.000386211	0.696272	0.298	0	1	5	Glyma.13G244400
0.00239437	0.68323	0.379	0.081	1	9	Glyma.15G166700
0.00429497	0.663608	0.379	0.081	1	9	Glyma.12G145400
0.00254191	0.66085	0.379	0.081	1	9	Glyma.07G095900
0.00405672	0.623492	0.379	0.081	1	9	Glyma.10G291400
0.00383052	0.594625	0.379	0.081	1	9	Glyma.15G268800
0.00538009	0.567625	0.379	0.081	1	9	Glyma.06G247100
3.30954e-13	0.691416	0.339	0.041	9.05622e-09	2	Glyma.07G015800
0.00140534	0.687122	0.51	0.212	1	5	Glyma.16G136600
0.0263793	0.652354	0.548	0.25	1	10	Glyma.08G222200
0.0290517	0.605887	0.548	0.25	1	10	Glyma.03G109900
0.046174	0.579939	0.548	0.25	1	10	Glyma.16G202400
0.000228226	0.556206	0.815	0.515	1	5	Glyma.09G248600
0.000413603	0.820635	0.3	0	1	8	Glyma.11G048300
1.61786e-05	0.770325	0.318	0.018	0.442712	6	Glyma.08G321400
0.000413603	0.733512	0.3	0	1	8	Glyma.02G215700
0.000413603	0.660696	0.3	0	1	8	Glyma.13G201500
0.000146874	0.647315	0.482	0.182	1	6	Glyma.17G128200
0.0219261	0.520352	0.738	0.438	1	10	Glyma.04G229900
1.60879e-10	0.690453	0.342	0.042	4.40229e-06	4	Glyma.05G101700
2.96783e-13	0.814167	0.362	0.061	8.12118e-09	2	Glyma.06G317800
1.79006e-10	0.674902	0.739	0.438	4.89832e-06	4	Glyma.14G109700
0.00061702	0.696646	0.543	0.242	1	5	Glyma.07G095000
1.97856e-09	0.711242	0.378	0.076	5.41412e-05	4	Glyma.06G127700
0.000261545	0.629208	0.447	0.145	1	6	Glyma.12G130000
0.00038242	0.585507	0.576	0.273	1	6	Glyma.11G148362
0.00076663	0.748066	0.364	0.061	1	5	Glyma.04G230000
1.52291e-06	0.742087	0.303	0	0.041673	7	Glyma.02G215700
6.02138e-05	0.720384	0.412	0.109	1	6	Glyma.05G215900
3.72517e-11	0.70623	0.425	0.122	1.01936e-06	2	Glyma.08G339400
5.53678e-09	0.689483	0.477	0.174	0.000151509	4	Glyma.08G220000
0.0372822	0.596746	0.429	0.125	1	10	Glyma.08G135200
0.0372822	0.555972	0.429	0.125	1	10	Glyma.03G253200
0.00209592	0.530823	0.929	0.625	1	10	Glyma.15G160300
1.96747e-05	0.819776	0.341	0.036	0.538379	6	Glyma.10G291400
2.69172e-05	0.780683	0.341	0.036	0.736562	6	Glyma.08G339500
1.91634e-05	0.724446	0.341	0.036	0.524386	6	Glyma.08G271402
0.00348433	0.714047	0.467	0.162	1	8	Glyma.06G012600
0.00111755	0.673124	0.517	0.212	1	5	Glyma.06G317800
6.97729e-06	0.794699	0.306	0	0.190926	6	Glyma.18G237900
6.97694e-06	0.792236	0.306	0	0.190917	6	Glyma.13G004400
0.000696003	0.768762	0.333	0.027	1	8	Glyma.08G137500
6.8338e-05	0.706957	0.506	0.2	1	6	Glyma.05G236300
0.00612865	0.591114	0.414	0.108	1	9	Glyma.01G093902
0.000501019	0.771116	0.397	0.091	1	5	Glyma.11G215500
0.000753533	0.691557	0.397	0.091	1	5	Glyma.09G274000
2.88418e-15	0.894446	0.33	0.023	7.89227e-11	3	Glyma.05G204600
0.0158427	0.656032	0.619	0.312	1	10	Glyma.16G079200
0.0246142	0.619891	0.619	0.312	1	10	Glyma.08G142400
0.000119041	0.612907	0.762	0.455	1	5	Glyma.03G136000
0.00140592	0.703916	0.55	0.242	1	5	Glyma.06G137000
0.00559402	0.645137	0.552	0.243	1	9	Glyma.09G027900
0.0151031	0.556227	0.552	0.243	1	9	Glyma.12G074100
0.00740038	0.527408	0.583	0.273	1	5	Glyma.05G082200
0.013654	0.824094	0.31	0	1	10	Glyma.20G163900
0.013654	0.775454	0.31	0	1	10	Glyma.07G093700
0.000324355	0.754203	0.31	0	1	9	Glyma.12G233400
4.3305e-05	0.753537	0.365	0.055	1	6	Glyma.17G250800
0.013654	0.751342	0.31	0	1	10	Glyma.03G052800
0.000324355	0.745187	0.31	0	1	9	Glyma.06G260100
0.013654	0.744193	0.31	0	1	10	Glyma.07G094200
0.013654	0.719268	0.31	0	1	10	Glyma.05G220300
0.000802336	0.703104	0.371	0.061	1	5	Glyma.16G109200
0.013654	0.70082	0.31	0	1	10	Glyma.04G076000
0.013654	0.699539	0.31	0	1	10	Glyma.11G229100
0.013654	0.687871	0.31	0	1	10	Glyma.10G165000
0.013654	0.686704	0.31	0	1	10	Glyma.04G139100
0.013654	0.656269	0.31	0	1	10	Glyma.02G024200
0.000324355	0.655441	0.31	0	1	9	Glyma.16G210800
0.013654	0.635114	0.31	0	1	10	Glyma.20G135800
0.000324355	0.620879	0.31	0	1	9	Glyma.06G268700
0.013654	0.615374	0.31	0	1	10	Glyma.09G181960
0.013654	0.593025	0.31	0	1	10	Glyma.18G264600
0.00733439	0.560752	0.81	0.5	1	10	Glyma.06G265000
8.27278e-06	0.785926	0.329	0.018	0.226376	6	Glyma.11G252200
4.49219e-08	0.641461	0.45	0.139	0.00122924	4	Glyma.11G208700
8.48338e-12	0.755683	0.333	0.021	2.32139e-07	4	Glyma.10G159700
0.01949	0.689754	0.5	0.188	1	10	Glyma.08G047300
0.0355164	0.684042	0.5	0.188	1	10	Glyma.09G274000
0.0409515	0.6093	0.5	0.188	1	10	Glyma.11G198300
0.0449538	0.578114	0.5	0.188	1	10	Glyma.05G197000
0.0409515	0.550161	0.5	0.188	1	10	Glyma.01G074000
0.00376061	0.521294	1	0.688	1	10	Glyma.06G259400
0.00122484	0.852666	0.367	0.054	1	8	Glyma.07G139100
3.47421e-16	0.692749	0.397	0.084	9.50683e-12	1	Glyma.14G200200
0.00566048	0.607342	0.448	0.135	1	9	Glyma.15G015100
0.00538097	0.59459	0.448	0.135	1	9	Glyma.04G064100
0.0455757	0.97297	0.467	0.154	1	11	Glyma.02G188300
0.0455757	0.85441	0.467	0.154	1	11	Glyma.14G155900
0.00762468	0.565059	0.586	0.27	1	9	Glyma.14G085800
0.000471023	0.82534	0.377	0.061	1	5	Glyma.09G053700
0.000620051	0.735043	0.377	0.061	1	5	Glyma.14G151100
0.000494621	0.731939	0.377	0.061	1	5	Glyma.02G183400
0.000513722	0.709773	0.437	0.121	1	5	Glyma.10G143900
2.67437e-10	0.751006	0.414	0.097	7.31815e-06	4	Glyma.07G039600
0.0032053	0.681115	0.533	0.216	1	8	Glyma.10G221500
0.000574651	0.797769	0.345	0.027	1	9	Glyma.09G115100
0.000618426	0.780216	0.345	0.027	1	9	Glyma.08G201300
9.48081e-05	0.727747	0.482	0.164	1	6	Glyma.14G118100
0.000715435	0.706864	0.345	0.027	1	9	Glyma.17G163200
0.00102317	0.64654	0.345	0.027	1	9	Glyma.08G067600
4.27546e-06	0.828982	0.318	0	0.116994	6	Glyma.13G265700
2.01763e-14	0.822276	0.374	0.056	5.52105e-10	2	Glyma.06G263900
1.10279e-14	0.924411	0.385	0.066	3.01767e-10	2	Glyma.09G053700
0.00105983	0.889435	0.4	0.081	1	8	Glyma.03G053500
1.4851e-19	0.869969	0.367	0.048	4.06383e-15	1	Glyma.13G032600
0.0132594	0.769542	0.381	0.062	1	10	Glyma.06G292200
3.76584e-06	0.768489	0.333	0.014	0.103049	7	Glyma.17G258200
0.0140847	0.762599	0.381	0.062	1	10	Glyma.03G054600
0.0149551	0.742509	0.381	0.062	1	10	Glyma.18G298500
0.0212406	0.73761	0.381	0.062	1	10	Glyma.10G098400
0.0237953	0.712765	0.381	0.062	1	10	Glyma.03G074000
0.0168391	0.670785	0.381	0.062	1	10	Glyma.02G193200
0.0178569	0.657554	0.381	0.062	1	10	Glyma.02G181500
0.0266124	0.645279	0.381	0.062	1	10	Glyma.17G237900
0.0266124	0.629881	0.381	0.062	1	10	Glyma.12G135600
1.40551e-10	0.81882	0.396	0.076	3.84605e-06	4	Glyma.15G160700
0.000240047	0.776047	0.351	0.03	1	5	Glyma.19G054700
0.0152256	0.663746	0.571	0.25	1	10	Glyma.10G143900
0.00676158	0.641432	0.483	0.162	1	9	Glyma.07G004300
0.00414105	0.624462	0.483	0.162	1	9	Glyma.08G339400
0.02766	0.623348	0.571	0.25	1	10	Glyma.04G121000
0.034999	0.57964	0.571	0.25	1	10	Glyma.12G155900
0.00143927	0.648789	0.503	0.182	1	5	Glyma.19G139800
0.0394812	1.03296	0.4	0.077	1	11	Glyma.02G203200
0.0394812	1.01919	0.4	0.077	1	11	Glyma.18G195200
0.0394812	0.925525	0.4	0.077	1	11	Glyma.15G160300
0.000304148	0.839789	0.444	0.121	1	5	Glyma.20G244900
0.000229977	0.816729	0.384	0.061	1	5	Glyma.10G098400
0.0394812	0.793487	0.4	0.077	1	11	Glyma.04G096100
0.0456546	0.744743	0.4	0.077	1	11	Glyma.20G166200
0.00123217	0.563428	0.656	0.333	1	5	Glyma.08G339500
1.38742e-05	0.785875	0.541	0.218	0.379653	6	Glyma.05G046000
3.05687e-14	0.719355	0.533	0.209	8.36483e-10	1	Glyma.06G259400
8.06226e-13	0.803281	0.477	0.152	2.20616e-08	2	Glyma.16G136600
0.000916223	0.887585	0.433	0.108	1	8	Glyma.12G089100
0.000662356	0.745843	0.379	0.054	1	9	Glyma.11G013200
0.00120683	0.702769	0.379	0.054	1	9	Glyma.07G165300
0.00113047	0.700051	0.379	0.054	1	9	Glyma.04G208300
0.000990979	0.689611	0.379	0.054	1	9	Glyma.05G011200
0.00137403	0.599497	0.379	0.054	1	9	Glyma.09G085300
6.80625e-05	0.914968	0.455	0.129	1	7	Glyma.04G229900
2.67845e-19	0.814347	0.377	0.051	7.32932e-15	1	Glyma.13G033500
4.46786e-24	0.892838	0.327	0	1.22259e-19	1	Glyma.11G204900
2.75929e-05	0.791286	0.4	0.073	0.755053	6	Glyma.06G259400
2.56718e-05	0.767246	0.4	0.073	0.702484	6	Glyma.15G105100
0.0254845	0.711912	0.452	0.125	1	10	Glyma.13G361900
0.0195401	0.671993	0.452	0.125	1	10	Glyma.11G196900
0.0195401	0.65665	0.452	0.125	1	10	Glyma.10G289700
0.000296028	0.783436	0.358	0.03	1	5	Glyma.06G260100
0.00163066	0.633841	0.57	0.242	1	5	Glyma.17G188300
0.00360647	0.732558	0.517	0.189	1	9	Glyma.16G039800
0.00310771	0.689051	0.517	0.189	1	9	Glyma.19G136400
0.0022939	0.685235	0.517	0.189	1	9	Glyma.05G180100
0.00845174	0.575626	0.517	0.189	1	9	Glyma.06G173500
1.73724e-05	0.714532	0.565	0.236	0.475378	6	Glyma.04G229900
1.21154e-05	0.799486	0.365	0.036	0.331526	6	Glyma.04G230000
0.00085264	0.742713	0.45	0.121	1	5	Glyma.13G029300
5.90327e-05	0.787867	0.603	0.273	1	5	Glyma.06G259400
0.000262113	0.896685	0.424	0.091	1	5	Glyma.15G219400
0.000773205	0.847426	0.414	0.081	1	9	Glyma.06G226700
0.00162727	0.760345	0.414	0.081	1	9	Glyma.01G133100
0.00162727	0.712624	0.414	0.081	1	9	Glyma.08G339500
0.00127572	0.665603	0.414	0.081	1	9	Glyma.02G288600
0.00232406	0.646143	0.414	0.081	1	9	Glyma.03G109900
0.0273096	0.984736	0.333	0	1	11	Glyma.16G210800
0.0273096	0.911538	0.333	0	1	11	Glyma.18G067500
0.0273096	0.864228	0.333	0	1	11	Glyma.05G184500
0.0273096	0.813291	0.333	0	1	11	Glyma.09G115100
0.000175017	0.804816	0.333	0	1	8	Glyma.17G258200
0.0273096	0.803034	0.333	0	1	11	Glyma.11G150034
0.00976395	0.800166	0.333	0	1	10	Glyma.08G130800
0.00976395	0.799807	0.333	0	1	10	Glyma.03G001500
0.0273096	0.798959	0.333	0	1	11	Glyma.01G149000
0.00976395	0.785543	0.333	0	1	10	Glyma.01G117900
0.0273096	0.78082	0.333	0	1	11	Glyma.13G072600
0.00976395	0.770672	0.333	0	1	10	Glyma.02G241200
0.0273096	0.764384	0.333	0	1	11	Glyma.09G255400
0.0273096	0.763269	0.333	0	1	11	Glyma.17G174500
0.0273096	0.762308	0.333	0	1	11	Glyma.16G008400
0.00976395	0.748816	0.333	0	1	10	Glyma.18G260700
0.00976395	0.713607	0.333	0	1	10	Glyma.03G015800
3.67143e-18	0.986791	0.339	0.005	1.00465e-13	2	Glyma.05G184500
2.06765e-10	0.794543	0.459	0.125	5.65793e-06	4	Glyma.09G182600
4.65559e-06	0.855516	0.353	0.018	0.127395	6	Glyma.16G177900
2.41117e-05	0.866336	0.518	0.182	0.659792	6	Glyma.06G137000
0.000296444	0.78221	0.457	0.121	1	5	Glyma.16G137000
0.0483658	0.554438	0.524	0.188	1	10	Glyma.11G206700
0.00493094	0.655778	0.552	0.216	1	9	Glyma.16G177900
0.00927942	0.63635	0.552	0.216	1	9	Glyma.16G031600
9.79111e-06	0.809735	0.412	0.073	0.267924	6	Glyma.07G039600
0.000262534	0.847731	0.367	0.027	1	8	Glyma.17G192000
2.81971e-11	0.800409	0.495	0.155	7.71587e-07	3	Glyma.04G229900
4.77613e-19	0.892771	0.457	0.117	1.30694e-14	1	Glyma.08G142000
0.00111128	0.788702	0.448	0.108	1	9	Glyma.10G169300
0.00198382	0.714619	0.448	0.108	1	9	Glyma.07G015800
0.0036403	0.579441	0.448	0.108	1	9	Glyma.10G261200
1.57571e-06	0.873945	0.341	0	0.0431176	6	Glyma.07G095000
1.57571e-06	0.832529	0.341	0	0.0431176	6	Glyma.07G093700
0.000157597	0.70864	0.541	0.2	1	6	Glyma.10G086800
7.17114e-11	0.808205	0.432	0.09	1.96231e-06	4	Glyma.11G061100
0.00513223	0.643088	0.586	0.243	1	9	Glyma.14G074700
0.0130333	0.794688	0.405	0.062	1	10	Glyma.01G108700
4.55397e-10	0.769441	0.468	0.125	1.24615e-05	4	Glyma.18G045200
0.0130333	0.721186	0.405	0.062	1	10	Glyma.11G150452
0.0195795	0.71945	0.405	0.062	1	10	Glyma.18G213200
0.016486	0.697205	0.405	0.062	1	10	Glyma.08G041800
0.0207177	0.687367	0.405	0.062	1	10	Glyma.03G138000
1.53058e-05	0.827091	0.435	0.091	0.418829	6	Glyma.05G204600
0.000132997	0.874828	0.345	0	1	9	Glyma.17G222400
0.000132997	0.843843	0.345	0	1	9	Glyma.16G057600
0.000132997	0.832694	0.345	0	1	9	Glyma.13G361900
0.000132997	0.763923	0.345	0	1	9	Glyma.11G163300
0.000132997	0.729309	0.345	0	1	9	Glyma.08G339300
0.000132997	0.728705	0.345	0	1	9	Glyma.04G230000
0.000132997	0.726359	0.345	0	1	9	Glyma.05G237200
0.000132997	0.701133	0.345	0	1	9	Glyma.06G191300
0.00434592	0.598084	0.724	0.378	1	9	Glyma.15G160700
0.0494155	0.430224	0.724	0.378	1	9	Glyma.11G168010
2.33346e-06	0.85648	0.365	0.018	0.0638529	6	Glyma.09G130400
0.000976431	0.757673	0.483	0.135	1	9	Glyma.12G091900
0.00517104	0.590645	0.483	0.135	1	9	Glyma.15G171000
0.00130642	0.743394	0.786	0.438	1	10	Glyma.07G095000
7.62917e-11	0.835763	0.432	0.083	2.08765e-06	4	Glyma.02G114100
5.4401e-07	0.843193	0.364	0.014	0.0148863	7	Glyma.13G117700
1.05975e-05	0.802042	0.459	0.109	0.289989	6	Glyma.06G293400
7.57657e-06	0.888615	0.424	0.073	0.207325	6	Glyma.12G112000
0.00980533	0.869961	0.476	0.125	1	10	Glyma.17G057800
0.000138551	0.794065	0.563	0.212	1	5	Glyma.12G022700
0.00120092	0.78266	0.567	0.216	1	8	Glyma.07G233100
0.0137795	0.756314	0.476	0.125	1	10	Glyma.09G168700
0.000748848	0.682944	0.563	0.212	1	5	Glyma.13G033000
0.0054515	0.626083	0.621	0.27	1	9	Glyma.11G048300
0.0353795	0.622248	0.476	0.125	1	10	Glyma.08G072200
0.032043	0.598382	0.476	0.125	1	10	Glyma.03G256700
2.17165e-06	0.909764	0.394	0.043	0.059425	7	Glyma.09G248600
0.000304582	0.801642	0.379	0.027	1	9	Glyma.06G293400
0.000225838	0.787083	0.379	0.027	1	9	Glyma.15G105100
0.000262454	0.677201	0.379	0.027	1	9	Glyma.09G194200
0.000439217	0.566973	0.379	0.027	1	9	Glyma.17G197200
9.47453e-07	0.949609	0.353	0	0.0259261	6	Glyma.15G160300
3.57427e-06	0.861849	0.518	0.164	0.0978062	6	Glyma.15G160700
3.93888e-05	0.785239	0.518	0.164	1	6	Glyma.03G134200
0.0002416	0.761468	0.536	0.182	1	5	Glyma.06G173500
2.0432e-06	0.950691	0.482	0.127	0.0559101	6	Glyma.18G195200
0.000204593	0.763851	0.629	0.273	1	5	Glyma.09G168700
0.000367021	0.756315	0.477	0.121	1	5	Glyma.08G339600
0.00692082	0.912081	0.357	0	1	10	Glyma.18G043600
2.79227e-06	0.897708	0.412	0.055	0.0764076	6	Glyma.05G180100
0.00692082	0.890347	0.357	0	1	10	Glyma.04G223300
0.00692082	0.825654	0.357	0	1	10	Glyma.03G054500
0.00692082	0.8172	0.357	0	1	10	Glyma.18G254300
0.00692082	0.758079	0.357	0	1	10	Glyma.10G219600
0.000146606	0.70053	0.722	0.364	1	5	Glyma.03G134200
1.00401e-05	0.883485	0.541	0.182	0.274738	6	Glyma.16G071500
1.23242e-21	0.854131	0.663	0.304	3.3724e-17	1	Glyma.16G071500
0.000470064	0.815099	0.414	0.054	1	9	Glyma.05G055100
0.000614878	0.770716	0.414	0.054	1	9	Glyma.13G033000
0.00103669	0.611366	0.414	0.054	1	9	Glyma.08G339600
0.0171292	0.755254	0.548	0.188	1	10	Glyma.03G053500
0.0131665	0.735449	0.548	0.188	1	10	Glyma.14G074700
0.0124789	0.674241	0.548	0.188	1	10	Glyma.10G251900
3.53844e-06	0.848067	0.471	0.109	0.0968259	6	Glyma.16G049000
2.5224e-13	0.769091	0.575	0.213	6.90228e-09	2	Glyma.09G248600
1.28033e-05	0.870832	0.606	0.243	0.350351	7	Glyma.05G236300
0.000155446	0.852951	0.424	0.061	1	5	Glyma.13G028100
0.0277127	0.642189	0.738	0.375	1	10	Glyma.16G071500
5.65966e-07	0.946279	0.365	0	0.0154871	6	Glyma.18G085400
5.65966e-07	0.934235	0.365	0	0.0154871	6	Glyma.15G021400
0.00553826	0.548639	0.69	0.324	1	9	Glyma.05G046000
0.000109333	0.894036	0.397	0.03	1	5	Glyma.16G218300
0.000375045	0.884417	0.448	0.081	1	9	Glyma.U031414
0.011982	0.809636	0.429	0.062	1	10	Glyma.04G017200
2.55075e-06	0.805632	0.424	0.057	0.0697987	7	Glyma.16G157100
0.0151294	0.740556	0.429	0.062	1	10	Glyma.02G159200
0.0134727	0.715776	0.429	0.062	1	10	Glyma.11G230300
0.011982	0.705719	0.429	0.062	1	10	Glyma.06G165200
0.000667982	0.697873	0.448	0.081	1	9	Glyma.13G117700
0.00139256	0.583957	0.448	0.081	1	9	Glyma.01G214300
1.84125e-11	0.831106	0.514	0.146	5.03839e-07	4	Glyma.19G136400
1.0164e-21	0.898751	0.442	0.073	2.78128e-17	1	Glyma.09G130400
5.4698e-06	0.826598	0.424	0.055	0.149676	6	Glyma.09G018900
0.0123447	0.751391	0.619	0.25	1	10	Glyma.06G264900
0.0136936	0.67984	0.619	0.25	1	10	Glyma.09G151400
0.00160002	0.776508	0.586	0.216	1	9	Glyma.09G248600
0.00319349	0.648793	0.586	0.216	1	9	Glyma.09G130400
4.29668e-05	0.967043	0.371	0	1	5	Glyma.18G237900
8.80025e-14	0.914561	0.414	0.042	2.4081e-09	4	Glyma.17G165200
0.000116106	0.804989	0.556	0.182	1	5	Glyma.13G033500
0.00677102	0.866555	0.5	0.125	1	10	Glyma.19G254800
0.0101685	0.822153	0.5	0.125	1	10	Glyma.07G065600
0.00906927	0.738728	0.5	0.125	1	10	Glyma.19G261200
0.0134519	0.716045	0.5	0.125	1	10	Glyma.05G204600
5.58488e-07	0.905966	0.412	0.036	0.0152825	6	Glyma.19G054700
0.0199063	0.625449	0.69	0.312	1	10	Glyma.08G339500
0.0363051	0.605028	0.69	0.312	1	10	Glyma.17G128200
0.0223779	1.05458	0.533	0.154	1	11	Glyma.07G065600
5.33578e-05	0.937629	0.379	0	1	9	Glyma.04G121000
2.98114e-09	0.849049	0.894	0.515	8.15758e-05	5	Glyma.18G195200
5.33578e-05	0.816517	0.379	0	1	9	Glyma.18G237900
0.0295243	0.7828	0.533	0.154	1	11	Glyma.16G071500
5.33578e-05	0.774973	0.379	0	1	9	Glyma.09G098400
5.33578e-05	0.773126	0.379	0	1	9	Glyma.14G222700
2.29345e-06	0.848365	0.435	0.055	0.062758	6	Glyma.17G165200
0.00485983	0.909076	0.381	0	1	10	Glyma.16G220900
0.00485983	0.861894	0.381	0	1	10	Glyma.08G360000
0.00485983	0.834006	0.381	0	1	10	Glyma.07G143500
0.000950373	0.679976	0.759	0.378	1	9	Glyma.03G136000
0.00427748	0.588479	0.759	0.378	1	9	Glyma.04G229900
0.000161099	0.847884	0.733	0.351	1	8	Glyma.04G012700
0.0013332	0.726249	0.517	0.135	1	9	Glyma.20G001000
0.007925	0.781954	0.571	0.188	1	10	Glyma.10G230000
0.0206089	0.640621	0.571	0.188	1	10	Glyma.12G073900
2.76747e-17	0.976513	0.5	0.117	7.57289e-13	2	Glyma.15G160300
5.09654e-05	0.790196	0.689	0.303	1	5	Glyma.06G263900
0.000126786	0.982192	0.414	0.027	1	9	Glyma.03G054600
0.000126786	0.778546	0.414	0.027	1	9	Glyma.11G020700
0.000171141	0.732262	0.414	0.027	1	9	Glyma.19G254800
2.1099e-16	0.967877	0.494	0.107	5.77353e-12	2	Glyma.06G137000
2.14268e-21	0.98553	0.623	0.234	5.86323e-17	1	Glyma.06G137000
9.4955e-06	0.783522	0.553	0.164	0.259835	6	Glyma.17G187600
0.0178733	0.922636	0.467	0.077	1	11	Glyma.08G072200
0.000363514	0.909267	0.552	0.162	1	9	Glyma.16G136600
0.0052617	0.869758	0.452	0.062	1	10	Glyma.10G271200
0.00635261	0.799452	0.452	0.062	1	10	Glyma.01G013500
2.26534e-05	1.08866	0.391	0	0.619887	5	Glyma.08G197700
1.91266e-25	0.973979	0.442	0.051	5.23381e-21	1	Glyma.16G177900
7.986e-07	0.945843	0.482	0.091	0.0218529	6	Glyma.12G091900
1.11403e-06	0.921063	0.518	0.127	0.0304843	6	Glyma.07G004300
0.000382753	0.882641	0.5	0.108	1	8	Glyma.11G096700
0.000194947	0.882718	0.69	0.297	1	9	Glyma.07G065600
0.000462844	0.785737	0.69	0.297	1	9	Glyma.06G263900
4.81755e-19	1.03112	0.454	0.061	1.31828e-14	2	Glyma.18G195200
0.00486052	0.740029	0.643	0.25	1	10	Glyma.13G033000
0.000107634	0.867109	0.448	0.054	1	9	Glyma.10G200700
0.000143363	0.764348	0.448	0.054	1	9	Glyma.11G034000
3.92642e-13	0.891081	0.486	0.09	1.07442e-08	4	Glyma.02G039000
9.36936e-19	0.868085	0.598	0.201	2.56383e-14	1	Glyma.01G153300
3.36631e-25	0.962775	0.437	0.04	9.21157e-21	1	Glyma.02G024200
4.05896e-05	0.926373	0.609	0.212	1	5	Glyma.10G229400
5.60158e-07	0.948049	0.471	0.073	0.0153282	6	Glyma.09G115100
0.00743526	0.850333	0.524	0.125	1	10	Glyma.13G033500
0.00661503	0.848243	0.524	0.125	1	10	Glyma.16G026400
0.0104705	0.754962	0.524	0.125	1	10	Glyma.15G059700
0.0117036	0.723568	0.524	0.125	1	10	Glyma.18G199000
0.0295786	0.950411	0.6	0.2	1	12	Glyma.04G229900
0.0349831	1.20085	0.4	0	1	12	Glyma.20G027700
0.0349831	1.14563	0.4	0	1	12	Glyma.17G230700
0.0349831	1.09718	0.4	0	1	12	Glyma.10G179500
0.0349831	1.07411	0.4	0	1	12	Glyma.08G359700
0.0349831	1.06038	0.4	0	1	12	Glyma.13G004600
0.0349831	1.04887	0.4	0	1	12	Glyma.08G293900
0.0349831	1.0411	0.4	0	1	12	Glyma.18G000100
0.0349831	1.01546	0.4	0	1	12	Glyma.02G049500
0.0349831	1.01319	0.4	0	1	12	Glyma.16G116300
0.0349831	1.01274	0.4	0	1	12	Glyma.05G232400
0.0134904	1.00853	0.4	0	1	11	Glyma.20G170000
0.0349831	1.00506	0.4	0	1	12	Glyma.09G266200
0.0134904	1.00403	0.4	0	1	11	Glyma.13G361900
0.0349831	0.995394	0.4	0	1	12	Glyma.05G091650
0.0349831	0.991208	0.4	0	1	12	Glyma.13G259100
0.0349831	0.918654	0.4	0	1	12	Glyma.20G229100
0.0134904	0.88458	0.4	0	1	11	Glyma.01G177700
0.00348541	0.871209	1	0.6	1	12	Glyma.20G058901
1.93761e-20	1.01792	0.437	0.036	5.30208e-16	2	Glyma.15G021400
0.000265007	0.878965	0.483	0.081	1	9	Glyma.18G067500
0.00104287	0.862683	0.714	0.312	1	10	Glyma.13G265700
0.00521199	0.7366	0.714	0.312	1	10	Glyma.03G134200
3.46719e-13	0.939973	0.577	0.174	9.48761e-09	4	Glyma.09G115100
3.17069e-17	0.940514	0.546	0.142	8.67629e-13	2	Glyma.06G259400
6.86955e-17	1.16239	0.405	0	1.87978e-12	4	Glyma.19G223000
0.00337902	0.922744	0.405	0	1	10	Glyma.12G224000
0.00337902	0.901339	0.405	0	1	10	Glyma.15G011900
0.00337902	0.873176	0.405	0	1	10	Glyma.04G096300
0.00337902	0.85979	0.405	0	1	10	Glyma.04G230000
0.00778555	0.850996	0.595	0.188	1	10	Glyma.08G328800
0.00554266	0.764745	0.595	0.188	1	10	Glyma.07G095900
0.00696082	0.754591	0.595	0.188	1	10	Glyma.19G255300
0.00554266	0.728706	0.595	0.188	1	10	Glyma.01G000900
0.0148368	0.712133	0.595	0.188	1	10	Glyma.02G183400
0.0182074	0.681548	0.595	0.188	1	10	Glyma.16G210600
4.93493e-14	0.931542	0.477	0.069	1.35039e-09	4	Glyma.04G236600
6.49929e-19	0.994348	0.494	0.086	1.77846e-14	2	Glyma.13G265700
0.000127828	0.941036	0.517	0.108	1	9	Glyma.07G095000
5.00816e-07	0.865085	0.576	0.164	0.0137043	6	Glyma.18G045200
0.0032655	1.0495	0.476	0.062	1	10	Glyma.01G153300
5.59089e-15	0.984651	0.595	0.181	1.52989e-10	4	Glyma.01G025800
2.65033e-31	0.953755	0.824	0.41	7.25236e-27	1	Glyma.15G101800
0.00396513	0.863291	0.476	0.062	1	10	Glyma.16G215000
6.6465e-16	0.99667	0.45	0.035	1.81875e-11	4	Glyma.05G180100
3.37735e-23	1.0101	0.588	0.172	9.24177e-19	1	Glyma.16G135200
3.435e-06	0.854891	0.781	0.364	0.0939954	5	Glyma.03G052800
0.0351719	0.646995	0.667	0.25	1	10	Glyma.15G021400
0.00232868	0.741967	0.857	0.438	1	10	Glyma.03G136000
4.84695e-15	1.00425	0.523	0.104	1.32632e-10	4	Glyma.07G093700
4.77078e-05	1.02247	0.448	0.027	1	9	Glyma.16G135200
3.49011e-05	1.01582	0.448	0.027	0.955035	9	Glyma.13G032600
4.41423e-05	0.865169	0.448	0.027	1	9	Glyma.09G151400
5.5674e-05	0.839652	0.448	0.027	1	9	Glyma.11G206300
5.36722e-25	0.999204	0.558	0.136	1.46869e-20	1	Glyma.10G169300
0.00721495	0.801541	0.548	0.125	1	10	Glyma.01G096000
1.28291e-24	0.986873	0.578	0.154	3.51055e-20	1	Glyma.09G135700
0.000879928	0.7915	0.586	0.162	1	9	Glyma.05G103600
4.74366e-08	1.14376	0.455	0.029	0.00129805	7	Glyma.08G339400
0.000820784	0.984078	0.738	0.312	1	10	Glyma.09G053700
0.00334422	0.768106	0.738	0.312	1	10	Glyma.06G147100
0.00690069	0.686996	0.738	0.312	1	10	Glyma.10G200700
0.0128861	0.620408	0.738	0.312	1	10	Glyma.10G169300
4.09762e-32	1.09774	0.432	0.004	1.12127e-27	1	Glyma.09G062600
4.48125e-05	1.1551	0.483	0.054	1	9	Glyma.03G053500
6.94607e-05	0.839174	0.483	0.054	1	9	Glyma.12G130000
0.00142556	0.923444	0.619	0.188	1	10	Glyma.09G181600
0.000421387	0.785254	0.621	0.189	1	9	Glyma.17G250800
9.77988e-07	1.04564	0.576	0.143	0.0267617	7	Glyma.05G204600
5.99524e-26	1.01143	0.563	0.128	1.64054e-21	1	Glyma.09G248600
0.000173356	0.82861	0.517	0.081	1	9	Glyma.17G215200
3.36696e-08	1.10607	0.494	0.055	0.000921334	6	Glyma.16G136600
4.91645e-08	1.06858	0.494	0.055	0.00134534	6	Glyma.09G248600
0.000995441	0.657745	0.655	0.216	1	9	Glyma.20G170000
0.00145679	0.880446	0.69	0.25	1	10	Glyma.11G148362
0.00122695	1.0156	0.571	0.125	1	10	Glyma.06G259100
0.000623607	0.746515	0.828	0.378	1	9	Glyma.11G148362
0.0014922	0.94808	0.643	0.188	1	10	Glyma.03G138200
1.07851e-05	0.9608	0.483	0.027	0.295124	9	Glyma.11G097000
1.37389e-05	0.910154	0.483	0.027	0.375952	9	Glyma.09G182600
0.00768199	1.26783	0.533	0.077	1	11	Glyma.07G143900
0.010629	1.02983	0.533	0.077	1	11	Glyma.17G187600
1.01048e-33	1.29757	0.472	0.015	2.76507e-29	1	Glyma.12G009200
0.00115062	0.807345	0.833	0.375	1	10	Glyma.05G237200
1.53549e-28	1.06976	0.618	0.158	4.20171e-24	1	Glyma.06G263900
0.00367442	1.03605	0.524	0.062	1	10	Glyma.06G263900
0.00192362	0.977954	0.524	0.062	1	10	Glyma.10G179500
0.000927342	0.944286	0.714	0.25	1	10	Glyma.18G281700
0.00174084	0.868621	0.714	0.25	1	10	Glyma.06G061900
0.00642378	1.13671	0.467	0	1	11	Glyma.07G070700
0.00111411	1.03042	0.595	0.125	1	10	Glyma.13G265800
0.000646797	0.987932	0.595	0.125	1	10	Glyma.07G015800
0.00668799	0.846315	0.595	0.125	1	10	Glyma.07G057400
7.48161e-18	1.10241	0.532	0.062	2.04727e-13	4	Glyma.12G112000
0.00802492	0.777928	0.667	0.188	1	10	Glyma.08G339600
2.59606e-05	1.03926	0.724	0.243	0.710386	9	Glyma.06G137000
1.42943e-05	1.13787	0.567	0.081	0.391149	8	Glyma.09G115100
0.000222581	1.01217	0.738	0.25	1	10	Glyma.16G137200
4.11781e-06	1.12678	0.517	0.027	0.11268	9	Glyma.12G112000
4.47347e-06	0.97765	0.517	0.027	0.122412	9	Glyma.12G132400
9.12278e-08	1.10046	0.735	0.242	0.00249636	5	Glyma.03G054600
7.43659e-08	1.08076	0.735	0.242	0.00203495	5	Glyma.15G021400
0.000383142	1.17215	0.619	0.125	1	10	Glyma.18G085400
5.31571e-07	1.42312	0.497	0	0.0145459	5	Glyma.18G216800
3.7802e-07	1.2009	0.589	0.091	0.0103441	5	Glyma.07G143500
5.69881e-06	1.08196	0.552	0.054	0.155942	9	Glyma.06G317800
0.000651355	0.893478	0.81	0.312	1	10	Glyma.07G067900
0.0149314	1.38443	0.5	0	1	12	Glyma.09G145600
0.0149314	1.15843	0.5	0	1	12	Glyma.08G135200
0.0187472	1.14952	0.6	0.1	1	12	Glyma.10G169600
0.000708297	1.06582	0.5	0	1	10	Glyma.07G132900
0.0459638	0.996425	0.6	0.1	1	12	Glyma.18G165700
0.00262432	0.852316	1	0.5	1	12	Glyma.14G134100
4.03464e-09	1.11121	0.612	0.109	0.000110404	6	Glyma.07G065600
3.25152e-06	1.30899	0.586	0.081	0.0889747	9	Glyma.18G195200
0.00174965	0.966705	0.571	0.062	1	10	Glyma.06G226700
0.000383129	1.02561	0.762	0.25	1	10	Glyma.13G032600
1.0821e-06	1.11491	0.517	0	0.0296105	9	Glyma.13G033500
2.32294e-07	1.04146	0.762	0.242	0.00635649	5	Glyma.07G143900
0.000465261	1.09544	0.524	0	1	10	Glyma.07G095800
0.000873911	1.06342	0.714	0.188	1	10	Glyma.10G169600
4.13422e-34	1.18349	0.704	0.176	1.13129e-29	1	Glyma.08G070800
0.000269934	1.29454	0.595	0.062	1	10	Glyma.08G201300
1.68752e-21	1.2549	0.568	0.035	4.61772e-17	4	Glyma.07G065600
5.81052e-06	1.09673	0.621	0.081	0.158999	9	Glyma.15G021400
0.000751593	1.07549	0.667	0.125	1	10	Glyma.17G250800
0.000751433	1.0585	0.667	0.125	1	10	Glyma.17G224800
0.00119183	0.9849	0.667	0.125	1	10	Glyma.05G055100
1.58937e-06	1.16136	0.655	0.108	0.0434914	9	Glyma.13G265700
0.000301639	1.19827	0.548	0	1	10	Glyma.16G176900
1.65074e-08	1.18046	0.702	0.152	0.000451709	5	Glyma.03G054500
0.000306822	1.05671	0.738	0.188	1	10	Glyma.08G044400
0.000566754	1.00299	0.738	0.188	1	10	Glyma.05G046000
3.81799e-07	1.15097	0.552	0	0.0104475	9	Glyma.06G147100
1.36423e-06	1.19786	0.69	0.135	0.0373307	9	Glyma.06G259400
0.000163075	1.43693	0.619	0.062	1	10	Glyma.18G216800
[truncated: 2,328 more rows]

## Sheet: Supplemental Table S1C
Supplemental Table S1C. List of RLP and NLR receptor genes with different classes expressed in our SnRNA-seq datasets in soybean.
No.		Class	No.		ID
1	RLPs	RLPs	1	RLP	Glyma.18G195200
2			2	RLP	Glyma.16G176900
3			3	RLP	Glyma.07G143500
4			4	RLP	Glyma.07G143900
5			5	RLP	Glyma.07G144100
6			6	RLP	Glyma.03G052800
1	NLRs	TNL	1	TNL	Glyma.01G133100
2			2	TNL	Glyma.03G054600
3			3	TNL	Glyma.06G259100
4			4	TNL	Glyma.06G259400
5			5	TNL	Glyma.06G259800
6			6	TNL	Glyma.06G260100
7			7	TNL	Glyma.06G261500
8			8	TNL	Glyma.06G263900
9			9	TNL	Glyma.06G264100
10			10	TNL	Glyma.06G265000
11			11	TNL	Glyma.06G268700
12			12	TNL	Glyma.07G067900
13			13	TNL	Glyma.12G132400
14			14	TNL	Glyma.12G135600
15			15	TNL	Glyma.13G028100
16			16	TNL	Glyma.14G151100
17			17	TNL	Glyma.16G033900
18			18	TNL	Glyma.16G087100
19			19	TNL	Glyma.16G127900
20			20	TNL	Glyma.16G135200
21			21	TNL	Glyma.16G136600
22			22	TNL	Glyma.16G137200
23			23	TNL	Glyma.16G210600
24			24	TNL	Glyma.16G210800
25			25	TNL	Glyma.16G215000
26			26	TNL	Glyma.19G054700
27			27	TNL	Glyma.20G020200
28		CNL	1	CNL	Glyma.08G328800
29			2	CNL	Glyma.12G236500
30			3	CNL	Glyma.07G065600
31			4	CNL	Glyma.07G077700
32			5	CNL	Glyma.14G008700
33			6	CNL	Glyma.14G204700
34			7	CNL	Glyma.16G031600
35			8	CNL	Glyma.18G226500
36			9	CNL	Glyma.18G281500
37			10	CNL	Glyma.18G082800
38			11	CNL	Glyma.13G184800
39			12	CNL	Glyma.04G137800
40			13	CNL	Glyma.19G085600
41			14	CNL	Glyma.02G184300
42			15	CNL	Glyma.12G011700
43		RNL	1	RNL	Glyma.01G183300
44			2	RNL	Glyma.17G179200
45			3	RNL	Glyma.17G180100
46			4	RNL	Glyma.05G082200

## Sheet: Supplemental Table S1D
Supplemental Table S1D. List of Silicon transporter (Influx and Efflux) genes in soybean.
Influx Si transporters
Names	Gene IDs
GmNIP2-1	Glyma.18G259500
GmNIP2-2	Glyma.09G238200
Efflux Si transporters
Names	Gene IDs
GmHiSil2a	Glyma.16G180700
GmHiSil2b	Glyma.16G180800
GmHiSil2c	Glyma.16G180900
GmHiSil2d	Glyma.09G134800
GmHiSil2e	Glyma.09G134900
GmHiSil2f	Glyma.09G135000

## Sheet: Supplemental Table S1E
Supplemental Table S1E. Primers used in this study.
qRT-PCR
Gene name	Forward primers	Reverse primers
GmElf1b	GTTGAAAAGCCAGGGGACA	TCTTACCCCTTGAGCGTGG
GmHiSil1a	TGCAGGAGGACTCATAGTGACAG	GCGAAACAGCTGGGTTCATGTG
GmHiSil1b	TGCAGGAGGACTCATAGTGACG	GAAACCGCGGGATTCATGTGTG
GmHiSil2c	AGCCTCAGCTGCTACTGTTTCC	CCCAAGCCAAGATTAGCCATGCTC
guide RNAs (gRNA) used in this study
Gene name	gRNA1	gRNA2
GmHiSil2b	ACTGGATCCTCTTCATCCTT	CACTTTCACTTGGAGTTGAT
GmHiSil2c	CTAGCTTCAAGTGCTAATAT	CAACAAATGCATCCAAGATG
Primers used for cloning of gRNAs into B2103 vector
GmHiSil2b gRNA cloning into B2103b
	Forward primers	Reverse primers
Reaction 1	TGCTCTTCTCAGACTGGATCCTCTTCATCCTTGTTTTAGAGCTAGAAATAGC	TCGTCTCCCAAGTGAAAGTGCTGCCTATACGGCAGTGAAC
Reaction 2	TCGTCTCACTTGGAGTTGATGTTTTAGAGCTAGAAATAGC	TGCTCTTCTGACCTGCCTATACGGCAGTGAAC
GmHiSil2c gRNA cloning into B2103b
	Forward primers	Reverse primers
Reaction 1	TGCTCTTCTCAGCTAGCTTCAAGTGCTAATATGTTTTAGAGCTAGAAATAGC	TCGTCTCCATGCATTTGTTGCTGCCTATACGGCAGTGAAC
Reaction 2	TCGTCTCAGCATCCAAGATGGTTTTAGAGCTAGAAATAGC	TGCTCTTCTGACCTGCCTATACGGCAGTGAAC
Genotyping of CRISPR/Cas9 edited roots
Primer Name	Forward primers	Reverse primers
GmHiSil2b-Geno	CCAATGACACTTCTTGCATTGTGTTG	TCCTCCTTTGTATCATTTGTCCCTTCC
GmHiSil2c-Geno	TCACCAATGACACATCTTGTGTTG	CTTGTGAAGAGTGCATAACATGTGC

## Sheet: Supplemental Table S1F
Supplemental Table S1F. The list of gene IDs with their names mentioned in the figures of this study.												Supplemental Table S1F. List of genes with their IDs mentioned in this study.
Fig 2A		Fig 2B		Fig 3C		Fig 3D		Fig 4E		Fig 4F		Fig 5A/B	Fig 5C		Fig 5D		Fig 6A		Fig S7		Fig S9		Fig S10A
Gene ID	Gene Name	Gene ID	Gene Name	Gene ID	Gene Name	Gene ID	Gene Name	Gene ID	Gene Name	Gene ID	Gene Name	Gene ID	Gene ID	Gene Name	Gene ID	Gene Name	Gene ID	Gene Name	Gene ID	Gene Name	Gene ID	Gene Name	Gene ID	Gene Name
Glyma.16G091100	Glyma.16G091100	Glyma.11G111100	GmFBA2	Glyma.05G203000	GmRWP1	Glyma.09G151400	GmCRK10	Glyma.19G261200	GmDCL1	Glyma.09G256000	GmMPK4	Glyma.05G082200	Glyma.07G143500	GmRLP9	Glyma.06G265000	GmTNL1	Glyma.18G259500	GmHiSil1a	Glyma.11G163300	GmWRKY33b	Glyma.08G198800	GmLRR1	Glyma.08G002100	GmPAD4
Glyma.02G001500	GmKCS11	Glyma.04G065600	Glyma.04G065600	Glyma.08G070800	GmABCG11	Glyma.14G200200	GmWRKY33a	Glyma.13G156500	GmDCL4			Glyma.17G180100	Glyma.07G144100	GmRLP13	Glyma.16G136600	GmTNL2	Glyma.09G238200	GmHiSil1b	Glyma.02G232600	GmWRKY33c	Glyma.18G294800	GmPKD1	Glyma.05G237200	GmSARD1a
Glyma.15G101800	GmBAS	Glyma.07G019700	GmPSAH2	Glyma.12G009200	GmSMT1	Glyma.09G258600	GmCRT3a	Glyma.11G190900	GmAGO5			Glyma.17G179200	Glyma.07G143900	GmRLP56	Glyma.06G259400	GmDSC1.1	Glyma.16G180900	GmHiSil2c	Glyma.18G244100	GmCRT3b	Glyma.14G113200	GmPRK5	Glyma.09G182400	GmSARD1b
Glyma.05G163400	Glyma.05G163400	Glyma.05G168400	GmFED-A	Glyma.09G062600	Glyma.09G062600							Glyma.01G183300			Glyma.18G082800	GmRPM1.1					Glyma.08G198000	GmRHS16	Glyma.06G061900	GmWRKY40
Glyma.17G069100	GmCER3	Glyma.18G057900	Glyma.18G057900	Glyma.15G101800	GmBAS							Glyma.12G011700			Glyma.17G180100	GmNRG1.2					Glyma.04G242400	GmPBP1B	Glyma.03G070600	GmICS1
Glyma.16G031600	Glyma.16G031600			Glyma.06G263900	Glyma.06G263900							Glyma.02G184300									Glyma.16G014600	GmL60RF1	Glyma.01G104100	GmICS2
Glyma.15G203900	GmLRL1	Glyma.16G031600	Glyma.16G031600	Glyma.09G248600	GmCRT3							Glyma.19G085600									Glyma.09G210400	GmRPS3/RPM1	Glyma.08G125600	GmPAL1
Glyma.20G247850	Glyma.20G247850	Glyma.15G160300	Glyma.15G160300	Glyma.16G177900	Glyma.16G177900							Glyma.04G137800									Glyma.16G190000	GmLRR2	Glyma.10G209800	GmPAL2
Glyma.16G071500	Glyma.16G071500			Glyma.02G024200	Glyma.02G024200							Glyma.13G184800									Glyma.11G083800	GmAEE1	Glyma.01G182700	GmMES1
Glyma.08G309900	GmGAUT15	Glyma.11G113300	GmMCM4	Glyma.10G169300	GmPP2-B10							Glyma.18G082800											Glyma.15G127200	GMNPR3a
Glyma.08G126800	GmFED A	Glyma.16G091100	Glyma.16G091100	Glyma.09G135700	GmTic32-IVa							Glyma.18G281500											Glyma.09G020800	GMNPR3b
Glyma.20G150600	GmELIP1	Glyma.14G026400	GmCSY3	Glyma.11G204900	GmCRK2							Glyma.18G226500											Glyma.14G031300	GMNPR3c
Glyma.04G020300	GmDRT112			Glyma.09G130400	Glyma.09G130400							Glyma.16G031600											Glyma.20G246400	GmTGA2a
Glyma.18G065900	Glyma.18G065900	Glyma.01G199400	GmALMT12	Glyma.16G071500	Glyma.16G071500							Glyma.14G204700											Glyma.03G127600	GmTGA2b
Glyma.05G092200	Glyma.05G092200	Glyma.07G153900	Glyma.07G153900	Glyma.06G137000	GmDMR6							Glyma.14G008700											Glyma.19G130200	GmTGA2c
Glyma.01G030500	GmCA2	Glyma.06G134900	GmHSP21	Glyma.13G032600	Glyma.13G032600							Glyma.07G077700											Glyma.13G085100	GmTGA3a
Glyma.04G156200	Glyma.04G156200			Glyma.13G033500	Glyma.13G033500							Glyma.07G065600											Glyma.11G236300	GmTGA3b
Glyma.07G091400	GmBBX15			Glyma.08G142000	Glyma.08G142000							Glyma.12G236500											Glyma.18G020900	GmTGA4
Glyma.16G095000	GmWEB1			Glyma.01G153300	GmCYP707A3							Glyma.08G328800											Glyma.15G232000	GmTGA5
Glyma.11G160484	Glyma.11G160484			Glyma.09G160400	GmAGAL2							Glyma.20G020200											Glyma.13G193700	GmTGA6
Glyma.03G052800	Glyma.03G052800			Glyma.06G317800	GmDER1							Glyma.19G054700											Glyma.09G274000	GmWRKY70
Glyma.07G143900	GmRLP15			Glyma.14G200200	GmWRKY33							Glyma.16G215000											Glyma.15G062700	GmPR1a
Glyma.03G053500	Glyma.03G053500			Glyma.10G271200	Glyma.10G271200							Glyma.16G210800											Glyma.15G062300	GmPR1b
Glyma.03G054600	Glyma.03G054600			Glyma.07G093700	GmBTS							Glyma.16G210600											Glyma.15G062500	GmPR1c
Glyma.09G168700	GmCNBT1			Glyma.07G065600	Glyma.07G065600							Glyma.16G137200
Glyma.02G188300	GmABCG22			Glyma.06G226700	Glyma.06G226700							Glyma.16G136600
Glyma.07G149600	GmCAX3			Glyma.09G062900	GmBGAL12							Glyma.16G135200
Glyma.03G057800	Glyma.03G057800			Glyma.20G178800	GmMLO6							Glyma.16G127900
Glyma.19G166500	Glyma.19G166500			Glyma.07G015800	GmPEN3							Glyma.16G087100
Glyma.09G078700	Glyma.09G078700			Glyma.06G293400	GmRMA1							Glyma.16G033900
Glyma.12G219300	GmLHCB3			Glyma.04G228300	GmPRR5							Glyma.14G151100
Glyma.17G212200	Glyma.17G212200			Glyma.06G259400	Glyma.06G259400							Glyma.13G028100
Glyma.17G100700	Glyma.17G100700			Glyma.16G137000	Glyma.16G137000							Glyma.12G135600
Glyma.14G086300	GmASPGB1			Glyma.14G008700	GmRFL1							Glyma.12G132400
Glyma.05G011200	Glyma.05G011200			Glyma.15G171000	Glyma.15G171000							Glyma.07G067900
Glyma.04G075100	GmHA5			Glyma.03G053500	Glyma.03G053500							Glyma.06G268700
Glyma.03G210100	Glyma.03G210100			Glyma.12G091900	Glyma.12G091900							Glyma.06G265000
Glyma.07G222500	GmPP2-A1			Glyma.07G089300	Glyma.07G089300							Glyma.06G264100
Glyma.15G210100	GmTPS1			Glyma.08G072200	GmAOX2							Glyma.06G263900
Glyma.06G242900	Glyma.06G242900			Glyma.18G195200	GmRLP13							Glyma.06G261500
Glyma.13G152780	Glyma.13G152780			Glyma.12G233400	GmTBL41							Glyma.06G260100
Glyma.08G350800	GmCYP93D1			Glyma.16G076300	Glyma.16G076300							Glyma.06G259800
Glyma.08G238100	GmCYP72A15			Glyma.14G195200	Glyma.14G195200							Glyma.06G259400
Glyma.12G096900	GmCSLB03			Glyma.09G078700	Glyma.09G078700							Glyma.06G259100
Glyma.07G006900	GmLOX1			Glyma.10G203000	GmABCG39							Glyma.03G054600
Glyma.17G224800	GmWRKY50			Glyma.07G267800	GmOPT3							Glyma.01G133100
Glyma.11G198300	GmAAE3			Glyma.05G204600	GmOSM34							Glyma.03G052800
Glyma.09G054100	Glyma.09G054100			Glyma.05G236300	GmPCR2							Glyma.07G144100
Glyma.09G151400	GmCRK10			Glyma.15G219300	GmRGLG4							Glyma.07G143900
Glyma.12G079500	Glyma.12G079500			Glyma.19G068300	Glyma.19G068300							Glyma.07G143500
Glyma.02G265800	Glyma.02G265800			Glyma.04G180400	GmRD22							Glyma.16G176900
Glyma.02G265700	Glyma.02G265700			Glyma.19G250233	GmLTL1							Glyma.18G195200
Glyma.08G067741	Glyma.08G067741			Glyma.03G252700	Glyma.03G252700
Glyma.08G068600	Glyma.08G068600			Glyma.13G046200	GmRBCS1B
Glyma.14G052067	Glyma.14G052067			Glyma.08G082900	GmCAB1
Glyma.01G199400	GmALMT12			Glyma.19G105100	GmTT4
Glyma.07G153900	Glyma.07G153900			Glyma.11G221000	GmRCA
Glyma.06G134900	GmHSP21			Glyma.01G152900	Glyma.01G152900
Glyma.02G069100	GmGLC			Glyma.01G132500	GmLTP4
Glyma.19G079600	Glyma.19G079600			Glyma.07G014500	Glyma.07G014500
				Glyma.13G160400	Glyma.13G160400
				Glyma.13G327000	GmBGAL8
				Glyma.14G115500	Glyma.14G115500
				Glyma.16G007700	GmGER1
				Glyma.10G060700	GmSHT
				Glyma.16G038300	GmATMS1
				Glyma.17G259500	Glyma.17G259500
				Glyma.17G069100	GmCER3
				Glyma.19G186100	GmGAMMA-TIP
				Glyma.19G190600	GmATCSLA09
				Glyma.08G126800	GmFED A
				Glyma.12G037400	GmFBA2
				Glyma.14G086300	GmASPGB1
				Glyma.20G150600	GmELIP1
				Glyma.08G108800	GmHOG1
				Glyma.11G189600	GmCSLA02
				Glyma.06G307100	Glyma.06G307100
				Glyma.04G020300	GmDRT112
				Glyma.11G217200	Glyma.11G217200
				Glyma.20G196900	Glyma.20G196900
				Glyma.02G160500	GmCCH
				Glyma.06G105700	GmSAH7
				Glyma.15G005000	Glyma.15G005000
				Glyma.05G216400	GmGH9C2
				Glyma.15G026500	GmLOX1
				Glyma.04G215800	GmPSAN
				Glyma.20G007900	GmLACS2
				Glyma.12G228800	GmTTL1
				Glyma.13G142400	Glyma.13G142400
				Glyma.15G174200	GmPSBX
				Glyma.15G275600	Glyma.15G275600
				Glyma.19G106800	GmGAPA-2
				Glyma.07G014100	Glyma.07G014100
				Glyma.16G044900	GmGAPA
				Glyma.08G165500	Glyma.08G165500
				Glyma.02G103900	GmPAB8
				Glyma.10G238100	Glyma.10G238100
				Glyma.08G175900	Glyma.08G175900
				Glyma.09G193300	Gmemb2726
				Glyma.10G179400	GmKCS11
				Glyma.05G184500	GmWRKY51
				Glyma.18G216800	Glyma.18G216800
				Glyma.18G237900	GmCRK29
				Glyma.16G176900	Glyma.16G176900
				Glyma.08G044400	GmSARD1
				Glyma.18G085400	GmSVL1
				Glyma.07G095800	GmPR5K
				Glyma.07G132900	Glyma.07G132900
				Glyma.17G224800	GmWRKY50
				Glyma.09G053700	Glyma.09G053700
				Glyma.13G265800	Glyma.13G265800
				Glyma.05G055100	Glyma.05G055100
				Glyma.09G181600	Glyma.09G181600
				Glyma.03G138200	GmAGK2
				Glyma.10G179500	GmSAUL1
				Glyma.03G136000	Glyma.03G136000
				Glyma.04G096300	GmZML1
				Glyma.12G224000	Glyma.12G224000
				Glyma.15G011900	GmABCG40
				Glyma.08G360000	Glyma.08G360000
				Glyma.16G220900	Glyma.16G220900
				Glyma.16G026400	GmWRKY46
				Glyma.07G057400	Glyma.07G057400
				Glyma.04G223300	GmWRKY70
				Glyma.10G219600	GmNAC017
				Glyma.18G254300	Glyma.18G254300
				Glyma.19G255300	GmCNGC1
				Glyma.01G096000	Glyma.01G096000
				Glyma.08G328800	GmRPM1
				Glyma.10G230000	GmSGT1B
				Glyma.19G261200	GmDCL1
				Glyma.01G117900	GmRK3
				Glyma.02G241200	GmcICDH
				Glyma.08G130800	Glyma.08G130800
				Glyma.18G260700	Glyma.18G260700
				Glyma.17G057800	GmACA10
				Glyma.15G059700	GmOPT4
				Glyma.04G017200	Glyma.04G017200
				Glyma.01G108700	Glyma.01G108700
				Glyma.06G292200	Glyma.06G292200
				Glyma.05G220300	Glyma.05G220300
				Glyma.20G163900	Glyma.20G163900
				Glyma.09G168700	GmCNBT1
				Glyma.03G054600	Glyma.03G054600
				Glyma.02G159200	Glyma.02G159200
				Glyma.01G019800	Glyma.01G019800
				Glyma.01G133100	Glyma.01G133100
				Glyma.02G195400	GmSYP121
				Glyma.15G048500	Glyma.15G048500
				Glyma.05G059300	GmPGSIP8
				Glyma.09G198300	GmHMGB2
				Glyma.17G100700	Glyma.17G100700
				Glyma.06G204200	Glyma.06G204200
				Glyma.11G098700	GmROC3
				Glyma.16G017400	GmLHY
				Glyma.04G001500	GmHCF244
				Glyma.11G099300	GmRPL12-A
				Glyma.11G192700	GmCSD2
				Glyma.16G146100	Glyma.16G146100
				Glyma.20G207500	Glyma.20G207500
				Glyma.07G262100	Glyma.07G262100
				Glyma.16G127300	GmFNR1
				Glyma.20G064100	Glyma.20G064100
				Glyma.03G176200	GmMOS11
				Glyma.08G362200	Glyma.08G362200
				Glyma.11G037500	Glyma.11G037500
				Glyma.12G046200	GmTic62
				Glyma.07G156100	Glyma.07G156100
				Glyma.01G031400	Glyma.01G031400
				Glyma.14G149700	GmLACS9
				Glyma.06G145700	GmATH13
				Glyma.08G170000	GmLOS1
				Glyma.12G174900	GmLOG1
				Glyma.10G032200	GmPSBW
				Glyma.05G050100	Glyma.05G050100
				Glyma.15G205600	GmFIP1[V]
				Glyma.02G001700	Glyma.02G001700
				Glyma.17G101700	GmRPE
				Glyma.04G188700	GmRABE1b
				Glyma.10G161400	GmNEK1
				Glyma.13G169500	GmCYP38
				Glyma.17G059100	GmCIA2
				Glyma.18G114900	GmPSBP-1
				Glyma.16G158700	Glyma.16G158700
				Glyma.08G226600	GmHCF173
				Glyma.18G241700	GmPSAL
				Glyma.04G002300	Glyma.04G002300
				Glyma.17G244600	Glyma.17G244600
				Glyma.18G222100	Glyma.18G222100
				Glyma.07G028800	Glyma.07G028800
				Glyma.14G213500	Glyma.14G213500
				Glyma.08G173700	GmPSBR
				Glyma.08G145400	Glyma.08G145400
				Glyma.14G222500	GmCDSP32
				Glyma.20G169200	Glyma.20G169200
				Glyma.12G010100	Gmscpl40
				Glyma.07G212800	GmNIR1
				Glyma.11G254100	GmAAE16
				Glyma.11G081100	GmndhF
				Glyma.09G184600	GmBBX15
				Glyma.09G098400	GmBT1
				Glyma.11G020700	GmRBOH F
				Glyma.16G057600	GmCLC-B
				Glyma.17G222400	Glyma.17G222400
				Glyma.11G034000	GmTIP2;3
				Glyma.09G194200	Glyma.09G194200
				Glyma.17G197200	Glyma.17G197200
				Glyma.02G136700	GmMEE14
				Glyma.05G068600	GmLON2
				Glyma.05G228700	Gmckl3
				Glyma.06G095700	GmSVP
				Glyma.09G208300	GmXTH30
				Glyma.18G245000	GmSYN4
				Glyma.07G165300	Glyma.07G165300
				Glyma.20G001000	GmATMAP65-6
				Glyma.07G266500	GmSCL13
				Glyma.12G194000	Glyma.12G194000
				Glyma.14G183000	GmUPL1
				Glyma.13G072800	Glyma.13G072800
				Glyma.20G179600	GmPLP6
				Glyma.19G201000	Glyma.19G201000
				Glyma.02G263900	GmMRH1
				Glyma.08G181200	GmPSD2
				Glyma.12G145400	GmRK1
				Glyma.10G171900	GmPKDM7D
				Glyma.20G012900	Glyma.20G012900
				Glyma.13G371900	Glyma.13G371900
				Glyma.18G033500	GmSBT4.13
				Glyma.07G126200	Glyma.07G126200
				Glyma.15G094700	Glyma.15G094700
				Glyma.14G033600	GmCHR5
				Glyma.08G269700	GmLAG13
				Glyma.09G260600	Glyma.09G260600
				Glyma.09G038600	GmBXL1
				Glyma.03G083100	GmSGT
				Glyma.17G112500	Glyma.17G112500
				Glyma.04G068700	Glyma.04G068700
				Glyma.18G280500	GmLINC1
				Glyma.03G029900	GmCYP83B1
				Glyma.08G104600	Glyma.08G104600
				Glyma.18G279800	GmTBL19
				Glyma.10G181100	GmXBAT35
				Glyma.15G196400	GmSSP4
				Glyma.12G074100	GmPHOT1
				Glyma.05G048000	GmATPD
				Glyma.08G363500	GmpsbZ
				Glyma.11G096400	Glyma.11G096400
				Glyma.04G008300	GmFBA1
				Glyma.19G196700	Glyma.19G196700
				Glyma.13G152780	Glyma.13G152780
				Glyma.08G350800	GmCYP93D1
				Glyma.12G096900	GmCSLB03
				Glyma.15G089000	Glyma.15G089000
				Glyma.07G185500	GmXF1
				Glyma.09G217300	GmROPGEF14
				Glyma.08G049400	Glyma.08G049400
				Glyma.09G131100	Glyma.09G131100
				Glyma.08G334100	GmSR45a
				Glyma.06G324300	GmCSLG1
				Glyma.06G120500	GmACR3
				Glyma.03G121500	GmCAMS1
				Glyma.11G149825	Glyma.11G149825
				Glyma.14G209400	GmPAO4
				Glyma.11G053400	GmUGT73B1
				Glyma.06G084200	Glyma.06G084200
				Glyma.09G015600	GmFPS1
				Glyma.02G296600	GmCZF1
				Glyma.02G155000	Glyma.02G155000
				Glyma.08G216700	Glyma.08G216700
				Glyma.16G018000	GmPRR5
				Glyma.18G143700	Glyma.18G143700
				Glyma.15G221300	GmUGT73B3
				Glyma.01G026700	GmAOAT2
				Glyma.09G151400	GmCRK10
